# Supplementary material for: Comprehensive Characterization of Human Lung Large Cell Carcinoma Identifies Transcriptomic Signatures with Potential Implications in Response to Immunotherapy
Source: MDPI journal article supplement (doi:10.3390/jcm11061500), 2022-03-09
Supplement: s1 [file s1]

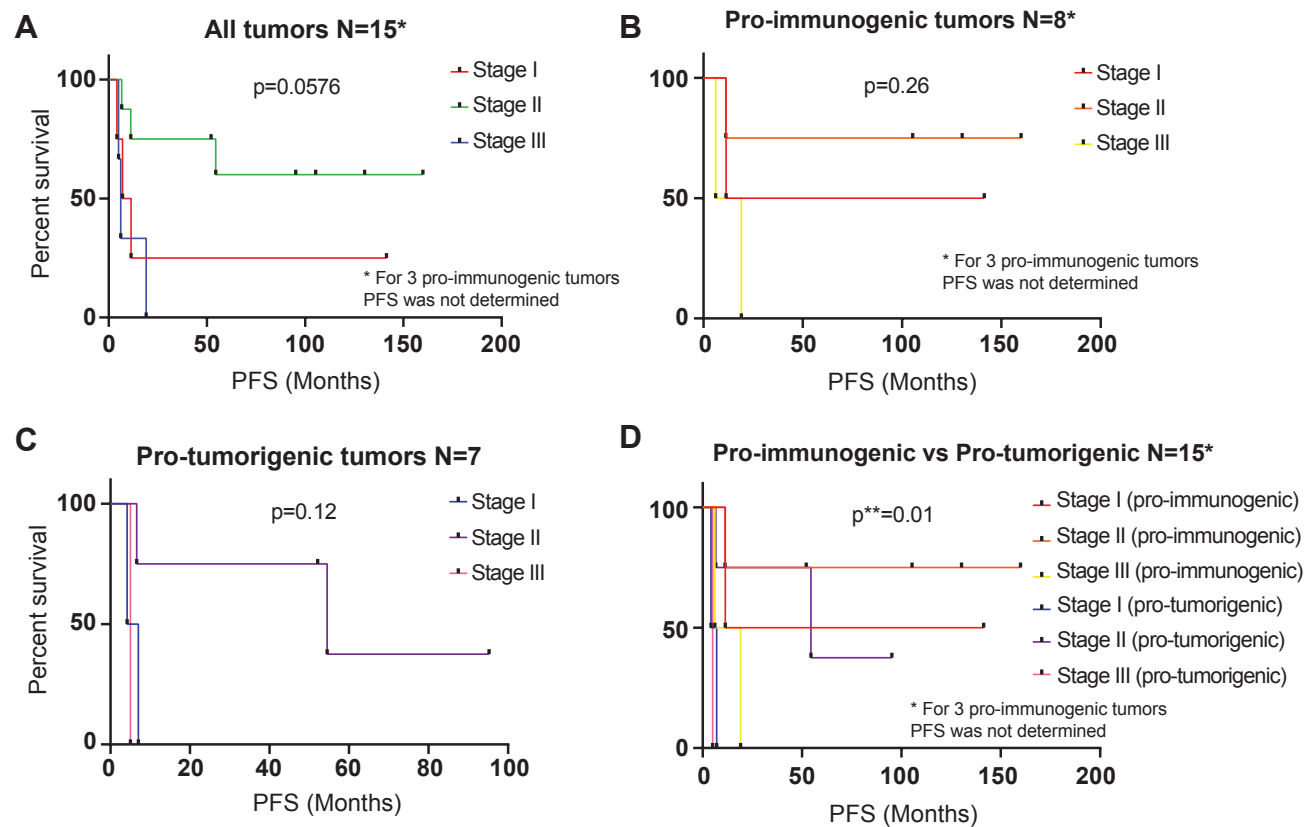

**Figure S3. Progression-free survival analysis of the LCC tumors according to their stage and transcriptomic subgroup.** Kaplan-Meier analysis of progression-free survival (PFS) according to stage in (A) all LCC tumors, (B) the pro-immunogenic tumors, (C), the pro-tumorigenic tumors and (D) all tumors divided by their transcriptomic subgroup.
