# Supplementary material for: Comprehensive Characterization of Human Lung Large Cell Carcinoma Identifies Transcriptomic Signatures with Potential Implications in Response to Immunotherapy
Source: MDPI journal article supplement (doi:10.3390/jcm11061500), 2022-03-09
Supplement: s1 [file s1]

**PD-L1 expression** compared to infiltration of:

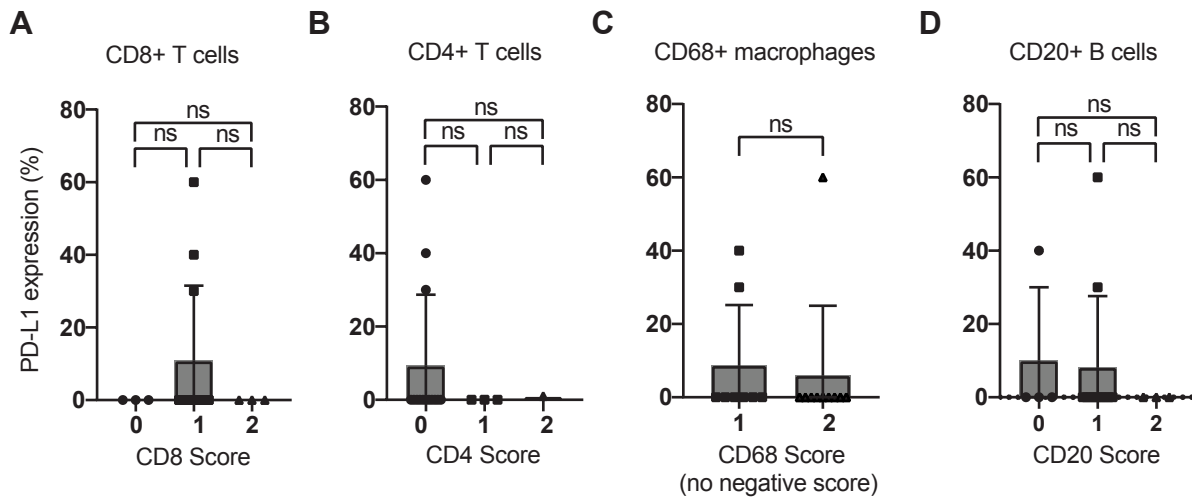

**Figure S1. PD-L1 expression and level of infiltration of the evaluated immune cell populations.**

Correlation between PD-L1 expression and immune infiltration from (A) T CD8+, (B) T CD4+, (C), CD68+ macrophages and (D) CD20+ B cells. Score 0: <1%, negative; Score 1: 1-10%, low expression; Score 2: >10%, high expression. No sample had a Score 0 for CD68+ macrophages. Staining  $\geq 1\%$  was considered to represent positivity for PD-L1.
