# Supplementary material for: Comprehensive Characterization of Human Lung Large Cell Carcinoma Identifies Transcriptomic Signatures with Potential Implications in Response to Immunotherapy
Source: MDPI journal article supplement (doi:10.3390/jcm11061500), 2022-03-09
Supplement: s1 [file s1]

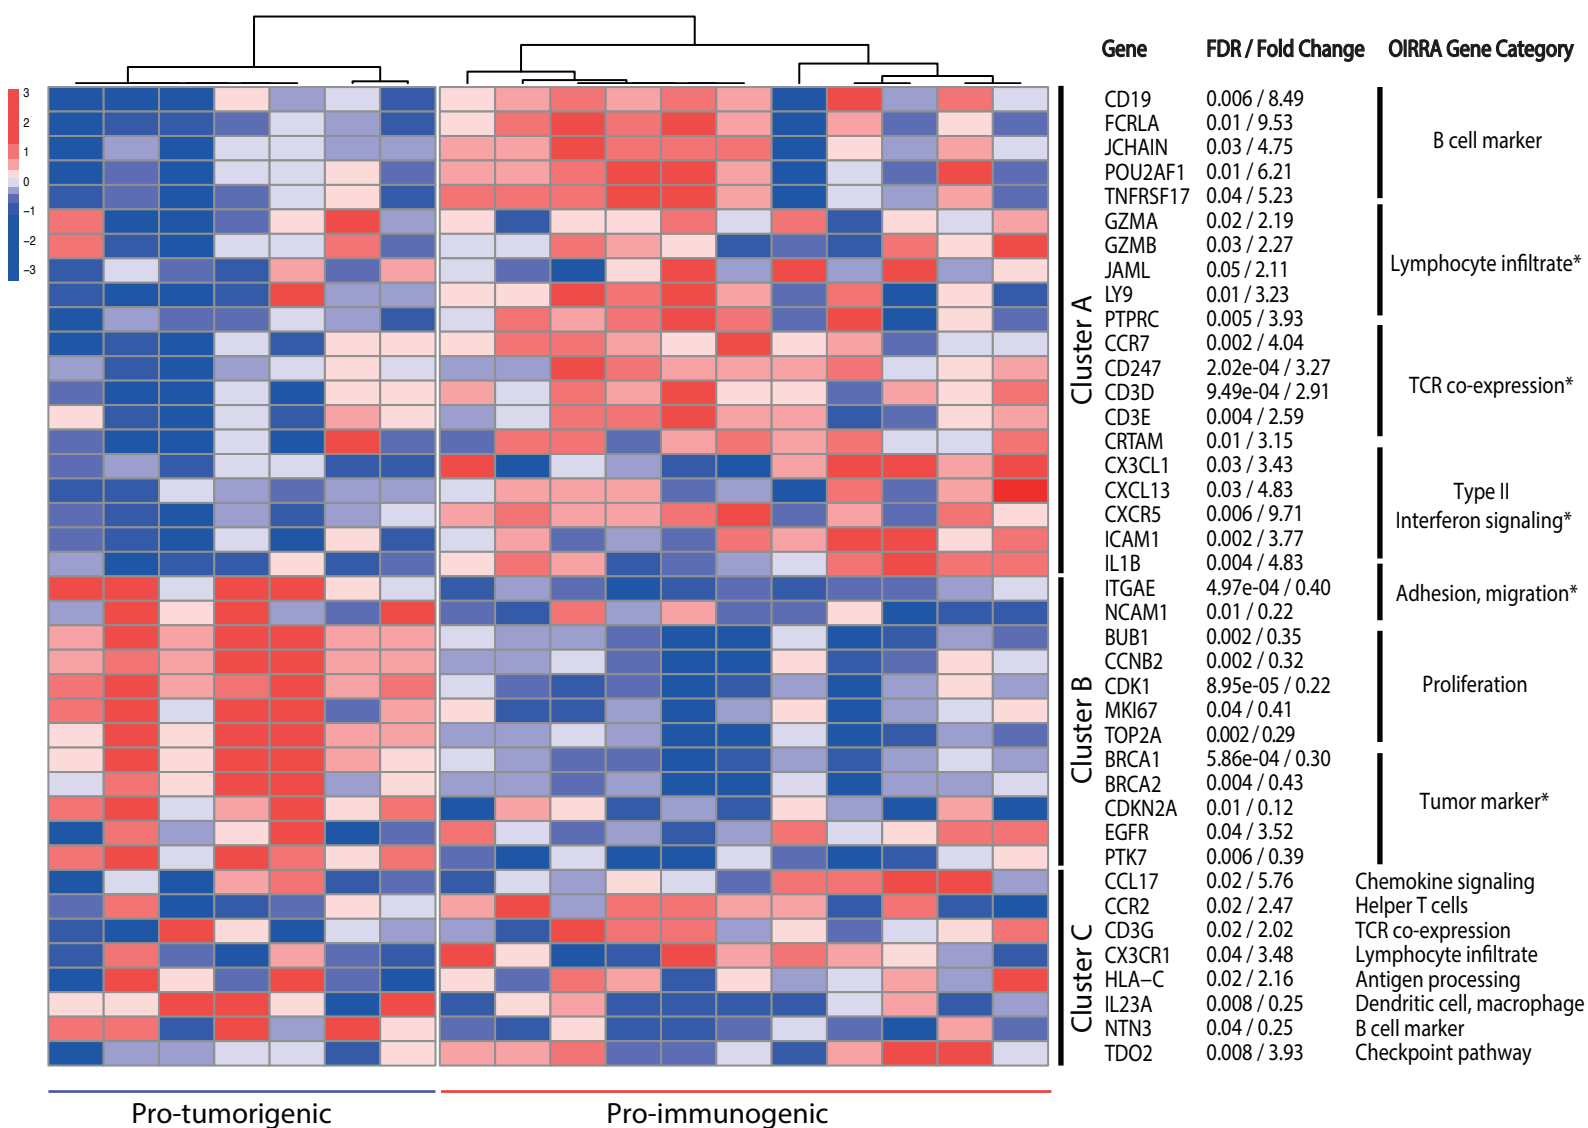

**Figure S2. Representative genes of each cluster and respective OIRRA gene categories.**

Heatmap of expression of representative genes of gene clusters A, B and C. Only differentially expressed genes were selected. Differential expression analysis was performed directionally, comparing pro-immunogenic tumors vs. pro-tumorigenic tumors. For each gene, FDR and Fold Change are provided. Specific OIRRA gene categories are specified. For gene clusters A and B statistically significant (\*) and over-represented OIRRA gene categories were prioritized. For cluster C, all differentially expressed genes were selected.
