# Supplementary material for: Comprehensive Characterization of Human Lung Large Cell Carcinoma Identifies Transcriptomic Signatures with Potential Implications in Response to Immunotherapy
Source: J Clin Med. 2022 Mar 9;11(6):1500. doi: 10.3390/jcm11061500 (PMC8953709; doi:10.3390/jcm11061500)
Supplement: Supplementary file 1 [file jcm-11-01500-s001.zip]

Archive with 8 entries (8 files):
- Figure S1.pdf
- Figure S2.pdf
- Figure S3_reviewed.pdf
- J Ramos-Paradas et al., Table S1.xlsx
- J Ramos-Paradas et al., Table S2.xlsx
- J Ramos-Paradas et al., Table S3.xlsx
- J Ramos-Paradas et al., Table S4.xlsx
- J Ramos-Paradas et al., Table S5_reviewed.xlsx
