# Supplementary material for: Comprehensive Characterization of Human Lung Large Cell Carcinoma Identifies Transcriptomic Signatures with Potential Implications in Response to Immunotherapy
Source: J Clin Med. 2022 Mar 9;11(6):1500. doi: 10.3390/jcm11061500 (PMC8953709; doi:10.3390/jcm11061500)
Supplement: Supplementary file 1 [file jcm-11-01500-s001.zip › J Ramos-Paradas et al., Table S1.xlsx]

## Sheet: DNA QC
SUPPLEMENTARY TABLE S1. Quality control metrics for DNA, RNA and sequencing libraries.
Supplementary Table S1A. Quality control metrics of stock DNA
#ID	DNA Stock concentration (ng/µl)	DNA Amplification cycles compared to quality control
P17011-001-132	198.515	0.491628
P17011-001-07	45.594	0.27191
P17011-001-08	15.276	0.223432
P17011-001-12	35.0866	0.0753547
P17011-001-15	28.6244	-0.198721
P17011-001-16	91.7764	0.151514
P17011-001-19	2.78252	-1.19712
P17011-001-20	3.99538	-1.10874
P17011-001-38	3.32	-1.35733
P17011-001-51	49.0119	-0.114424
P17011-001-101	39.8633	0.528929
P17011-001-113	126.416	0.233693
P17011-001-119	225.156	0.99387
P17011-001-127	58.4004	0.310863
P17011-001-131	160.481	0.582354
P17011-001-145	131.004	0.154183
P17011-001-166	35.3736	-0.0928325
P17011-001-174	100.567	0.446313

## Sheet: RNA QC
Supplementary Table S1B. Quality control metrics of stock RNA
#ID	RNA Stock concentration (ng/µl)	RNA Integrity Number (RIN)
P17011-001-132	159.01	8.1
P17011-001-07	223.926	8.2
P17011-001-08	78.147	7.6
P17011-001-12	192.864	7.8
P17011-001-15	7.8976	1
P17011-001-16	108.838	9
P17011-001-19	14.3384	7.8
P17011-001-20	14.2462	7.9
P17011-001-38	1.3484	N/A
P17011-001-51	146.783	9.1
P17011-001-101	71.0529	9.1
P17011-001-113	129.82	9
P17011-001-119	624.638	7.8
P17011-001-127	202.389	8.2
P17011-001-131	283.291	8
P17011-001-145	81.5571	8.6
P17011-001-166	46.9461	8.6
P17011-001-174	152.454	9

## Sheet: TST170 Libraries
Supplementary Table S1C. Quality control parameters and library generation data with TST170 (N=18)
	DNA LIBRARIES										RNA LIBRARIES
#ID	TST170 DNA input (ng)	Sheared peak size (bp)	DNA Library concentration prior to normalization (ng/µl)	Nº of clusters	Nº of reads	Median insert size	% of chimeric reads	% of exonic bases with coverage ≥ 100X	Median absolute deviations from the median coverage	Median of the raw read counts (normalized by region size)	TST170 RNA input (ng)	RNA Library concentration prior to normalization (ng/µl)	Nº of clusters	Nº of reads	Median insert size	Median CV coverage 1000X	% of chimeric reads	% of reads that aligned to the targeted regions
P17011-001-132	120	152	22.2	45331145	90662290	132	0.23	99.74	0.09	18.29	85	3.06	7296303	14592606	80	1.14	0.13	83.3
P17011-001-07	120	150	23	47690529	95381058	132	0.21	99.79	0.05	15.32	85	10.6	13054289	26108578	111	0.58	0.29	89.32
P17011-001-08	120	150	21	49414801	98829602	132	0.29	99.74	0.08	12.63	85	13.8	11272699	22545398	111	0.57	0.34	88.64
P17011-001-12	120	153	21.2	49962903	99925806	126	0.61	99.64	0.12	9.42	85	2.21	13374927	26749854	107	0.59	0.25	90.03
P17011-001-15	120	145	20.1	49733014	99466028	126	0.85	99.75	0.06	10.13	85	5.88	11444851	22889702	103	0.91	0.35	79.94
P17011-001-16	120	150	21.5	NA	NA	NA	NA	NA	NA	NA	85	17.1	NA	NA	NA	NA	NA	NA
P17011-001-19	120	153	18.5	51070569	102141138	136	0.17	99.8	0.1	37.13	85	12.2	11245194	22490388	115	0.59	0.34	89.03
P17011-001-20	120	140	21.5	45251823	90503646	142	0.14	99.5	0.26	34.83	85	20.4	11439737	22879474	110	0.62	0.44	84.88
P17011-001-38	120	145	23.4	46385723	92771446	140	0.14	99.78	0.09	26.46	85	16.4	8878508	17757016	111	0.58	0.46	80.22
P17011-001-51	120	141	21.7	44039116	88078232	140	0.4	99.78	0.08	20.66	85	14.5	12631613	25263226	114	0.56	0.37	89.46
P17011-001-101	120	139	20.9	48319177	96638354	129	0.29	99.74	0.08	19.56	85	23.3	12193995	24387990	111	0.61	0.31	87.69
P17011-001-113	120	144	23.2	49055357	98110714	125	0.65	99.47	0.16	9.01	85	21.9	12388142	24776284	111	0.6	0.45	84.77
P17011-001-119	120	152	19.9	42499009	84998018	132	0.78	99.68	0.2	10.03	85	21.8	12609645	25219290	113	0.57	0.44	86.71
P17011-001-127	120	157	21.2	46184077	92368154	131	0.69	99.73	0.11	12.56	85	12.9	14020610	28041220	112	0.58	0.29	88.93
P17011-001-131	120	150	23.2	48002961	96005922	126	0.65	99.59	0.13	9.13	85	15	12836244	25672488	112	0.6	0.31	88.46
P17011-001-145	120	140	22	50041352	100082704	130	0.81	99.84	0.21	12.56	85	7.59	12484666	24969332	114	0.56	0.37	87.38
P17011-001-166	120	151	20.5	43722562	87445124	139	0.29	99.83	0.26	23.35	85	17.8	13344140	26688280	116	0.56	0.3	90.12
P17011-001-174	120	147	22.3	46846668	93693336	132	0.86	99.77	0.19	10.32	85	20.8	14760248	29520496	114	0.55	0.44	85.91

## Sheet: OIRRA Libraries
Supplementary Table S1D. Quality control parameters and library generation data with OIRRA (N=18)
#ID	OIRRA RNA input (ng)	Bases	≥ Q20	Reads	Mapped reads	Valid reads (%)	Mean Read Length (bp)	Targets ≥ 1 reads	Targets ≥ 2 reads	Targets ≥ 10 reads
P17011-001-132	10	201791012	189792487	174155	1761912	93.77	114	378	374	351
P17011-001-07	10	218073058	205377451	1942823	1941300	88.98	112	387	380	369
P17011-001-08	10	223574946	207992746	1970768	1967371	92.82	113	384	377	363
P17011-001-12	10	220060408	205032774	1959439	1955736	91.49	112	381	379	363
P17011-001-15	10	254628628	240410395	2288945	2279895	90.98	111	392	391	381
P17011-001-16	10	251790489	237470118	2218924	2215501	91.82	113	380	374	364
P17011-001-19	10	260827468	242919753	2283963	2278323	90.33	114	384	379	364
P17011-001-20	10	230786986	219319065	1991136	1988491	96.28	115	377	372	348
P17011-001-38	10	343928398	324572159	3064674	3057476	93.88	112	380	377	362
P17011-001-51	10	282309092	266615007	2489189	2486055	93.27	113	386	382	369
P17011-001-101	10	328529070	309393517	2961633	2957642	91.67	110	387	384	375
P17011-001-113	10	245078210	232765798	2154821	2152388	93.51	113	385	378	365
P17011-001-119	10	225991580	215243853	1975046	1972898	94.83	114	373	370	348
P17011-001-127	10	237110078	225126489	2117904	2115630	92.59	111	381	376	362
P17011-001-131	10	236689684	223059575	2077527	2075069	95.46	113	380	374	364
P17011-001-145	10	251772261	237474112	2194244	2191367	92.26	114	390	387	367
P17011-001-166	10	250292827	237083262	2197867	2194581	94.08	113	386	381	361
P17011-001-174	10	240695618	228269131	2128718	2126416	92.88	113	381	373	353
