# Supplementary material for: Comprehensive Characterization of Human Lung Large Cell Carcinoma Identifies Transcriptomic Signatures with Potential Implications in Response to Immunotherapy
Source: J Clin Med. 2022 Mar 9;11(6):1500. doi: 10.3390/jcm11061500 (PMC8953709; doi:10.3390/jcm11061500)
Supplement: Supplementary file 1 [file jcm-11-01500-s001.zip › J Ramos-Paradas et al., Table S2.xlsx]

## Sheet: Molecular alterations TST170
SUPPLEMENTARY TABLE S2. Molecular alterations detected with TruSight Tumor 170.
ID	Gene	Variant Class	Variant Type	Additional information
P17011-001-132	AKT1	Small Variant	Missense	D3N
	APC	Small Variant	Stopgain	E1079X
	FGF10	CNV	Gain	2.384
	FGFR1	CNV	Gain	2.593
	IDH2	Small Variant	Missense	R37P
	PIK3CB	CNV	Gain	1.487
	RICTOR	CNV	Gain	2.259
	TFRC	CNV	Gain	1.563
	TP53	Small Variant	Missense	C9W
P17011-001-07	ARID1A	Small Variant	Frameshift	R2236fs
	EGFR	Small Variant	Missense	S790N
	ESR1	Small Variant	Missense	A70S
	FANCI	Small Variant	Inframe	742_743del
	KIT	Small Variant	Missense	I315V
	MET	CNV	Gain	2.232
	MET	RNA Detected	Fusion	CACNA1C
	RB1	Small Variant	Frameshift	N284fs
	TP53	Small Variant	Stopgain	E89X
P17011-001-08	BRAF	Small Variant	Missense	D594N
	BRCA1	Small Variant	Missense	I870M
	CDK6	CNV	Gain	1.907
	CREBBP	Small Variant	Missense	M2144I
	JAK2	Small Variant	Missense	G127A
	MET	CNV	Gain	2.61
P17011-001-12	AR	CNV	Gain	1.367
	BTK	Small Variant	Missense	I453T
	CCNE1	CNV	Gain	5.264
	CDH1	Small Variant	Missense	P534R
	ERBB4	Small Variant	Missense	M343I
	ERBB4	Small Variant	Missense	V732I
	FGF10	CNV	Gain	1.793
	FGF23	CNV	Gain	1.651
	FGF6	CNV	Gain	1.813
	KIT	RNA Detected	Fusion	PDGFRA
	KRAS	CNV	Gain	1.596
	MSH6	Small Variant	Missense	A25P
	MYCN	CNV	Gain	1.495
	NOTCH1	Small Variant	Missense	C1025W
	NOTCH2	RNA Detected	Fusion	PDE4DIP
	PTEN	Small Variant	Frameshift	V317fs
	RB1	Small Variant	Frameshift	I273fs
	TP53	Small Variant	Stopgain	E211X
P17011-001-15	FOXL2	Small Variant	Missense	D364N
	NOTCH1	Small Variant	Missense	R1356G
	SLX4	Small Variant	Missense	A1389E
P17011-001-16	CCND1	CNV	Gain	5.029
	EP300	Small Variant	Missense	R1948I
	ERBB4	Small Variant	Missense	I658T
	FGF19	CNV	Gain	5.094
	FGF3	CNV	Gain	5.014
	FGF4	CNV	Gain	4.868
	FLT3	Small Variant	Missense	E266Q
	KIT	CNV	Gain	1.651
	NRG1	Small Variant	Missense	L175W
	NRG1	Small Variant	Missense	Y110F
	PDGFRA	CNV	Gain	1.654
	PDGFRA	Small Variant	Missense	Y405N
	PIK3CA	CNV	Gain	2.631
	PIK3CB	CNV	Gain	1.946
	TET2	Small Variant	Missense	Q1414E
	TP53	Small Variant	Missense	R150W
P17011-001-19	CCND1	CNV	Gain	4.161
	CCNE1	CNV	Gain	1.391
	DNMT3A	Small Variant	Missense	P59R
	FGF19	CNV	Gain	4.454
	FGF3	CNV	Gain	4.485
	FGF4	CNV	Gain	4.58
	MYC	Small Variant	Inframe	271_272del
	TP53	Small Variant	Missense	C9Y
P17011-001-20	ATR	Small Variant	Missense	T1512I
	CCND1	CNV	Gain	8.804
	CDK4	CNV	Gain	1.56
	CHEK2	CNV	Gain	1.769
	CREBBP	Small Variant	Missense	P504S
	ERBB2	CNV	Gain	1.739
	FGF19	CNV	Gain	6.263
	FGF2	CNV	Loss	0.549
	FGF7	CNV	Loss	0.596
	INPP4B	Small Variant	Missense	R874Q
	NOTCH3	Small Variant	Missense	A564T
	NRAS	CNV	Loss	0.482
	PIK3CA	CNV	Gain	3.846
	PIK3CB	CNV	Gain	1.51
	PIK3CG	Small Variant	Missense	T506N
	PIK3R1	Small Variant	Stopgain	R18X
	RAD51D	Small Variant	Stopgain	D62_I63delinsDX
	TFRC	CNV	Gain	2.076
	TP53	Small Variant	Missense	G113V
	TP53	Small Variant	Missense	K93R
P17011-001-38	CARD11	Small Variant	Missense	R1133C
	FGF19	CNV	Gain	1.574
	FGFR3	Small Variant	Missense	A314G
	MLH1	Small Variant	Inframe	1129_1130GC
	MRE11	Small Variant	Missense	R380H
	NBN	Small Variant	Missense	P498L
	NF1	Small Variant	Missense	P2476L
	PIK3CG	Small Variant	Missense	V162I
	ROS1	Small Variant	Missense	I2154T
	TET2	Small Variant	Missense	S1611F
	TP53	Small Variant	Missense	C3Y
P17011-001-51	ALK	Small Variant	Missense	L1325V
	CDK4	CNV	Gain	2.108
	DNMT3A	Small Variant	Missense	N686D
	DNMT3A	Small Variant	Missense	V223M
	ERCC1	CNV	Gain	1.518
	FGF8	Small Variant	Missense	T55M
	KMT2A	Small Variant	Missense	D2387V
	MTOR	Small Variant	Missense	F63L
	MTOR	Small Variant	Missense	R460Q
	NOTCH3	Small Variant	Missense	D924H
	RAD54L	Small Variant	Missense	E122K
	RAD54L	Small Variant	Missense	G235E
	RB1	Small Variant	Frameshift	E170fs
	STK11	Small Variant	Missense	S216F
	TP53	Small Variant	Missense	Y73C
	XRCC2	Small Variant	Missense	E105K
P17011-001-101	AKT3	Small Variant	Missense	H284Q
	ARID1A	Small Variant	Frameshift	G455fs
	ATM	Small Variant	Missense	V849L
	BRCA2	Small Variant	Missense	V1969F
	FLT3	Small Variant	Missense	R810S
	NRG1	Small Variant	Missense	E417K
	PDGFRB	Small Variant	Missense	S1000Y
	STK11	Small Variant	Missense	R297M
	TP53	Small Variant	Inframe	47_47del
P17011-001-113	ATR	Small Variant	Missense	M197T
	BRCA2	CNV	Loss	0.579
	FGF10	CNV	Gain	1.55
	FGFR2	Small Variant	Missense	E323D
	IDH1	Small Variant	Missense	D43E
	JAK2	CNV	Loss	0.586
	NF1	Small Variant	Missense	D2504Y
	NF1	Small Variant	Missense	T584S
	NOTCH1	Small Variant	Missense	S991Y
	PIK3CB	Small Variant	Missense	H447R
	STK11	Small Variant	Missense	T367M
	TP53	Small Variant	Missense	H47Y
P17011-001-119	AKT3	RNA Detected	Fusion	KIF26B
	ATM	CNV	Gain	1.513
	ATR	Small Variant	Missense	D1559G
	ATR	Small Variant	Missense	R2459H
	CARD11	Small Variant	Missense	R932W
	CCND3	CNV	Gain	1.848
	CCNE1	CNV	Gain	1.493
	CHEK1	CNV	Gain	1.565
	CTNNB1	Small Variant	Missense	S45F
	JAK2	CNV	Gain	1.621
	MYC	CNV	Gain	3.491
	MYCN	CNV	Gain	1.41
	NRAS	CNV	Loss	0.557
	NRG1	Small Variant	Missense	D98E
	PDGFRA	Small Variant	Missense	R115S
	PIK3CD	Small Variant	Missense	W288L
	RET	Small Variant	Missense	V486L
	STK11	Small Variant	Stopgain	E92X
	TET2	Small Variant	Missense	Y60C
P17011-001-127	BRCA1	Small Variant	Missense	T1075A
	CARD11	Small Variant	Missense	I257F
	FGF19	CNV	Gain	1.407
	FGFR2	Small Variant	Inframe	301_302TT
	KRAS	CNV	Gain	1.806
	KRAS	Small Variant	Missense	G12C
	MYC	CNV	Gain	2.084
	NRG1	Small Variant	Missense	R8C
	RAD54L	Small Variant	Missense	C414Y
	ROS1	Small Variant	Missense	R493H
	STK11	Small Variant	Stopgain	E223X
	TP53	Small Variant	Missense	R117S
P17011-001-131	BRIP1	Small Variant	Missense	K703Q
	CCND1	CNV	Gain	6.856
	FGF19	CNV	Gain	7.287
	FGF3	CNV	Gain	7.494
	FGF4	CNV	Gain	7.384
	LAMP1	CNV	Gain	12.459
	SRC	Small Variant	Stopgain	E507X
	TP53	Small Variant	Frameshift	M1fs
P17011-001-145	ALK	CNV	Gain	1.557
	CCNE1	CNV	Gain	2.292
	FGF10	CNV	Gain	1.448
	FGF19	CNV	Gain	1.424
	FGF3	CNV	Gain	1.512
	FGF4	CNV	Gain	1.51
	GNAS	Small Variant	Missense	Q78L
	INPP4B	Small Variant	Missense	V605L
	KDR	Small Variant	Missense	R549W
	LAMP1	CNV	Gain	1.447
	MYCN	CNV	Gain	1.778
	NF1	Small Variant	Missense	G1216V
	NF1	Small Variant	Missense	P1528A
	NOTCH1	RNA Detected	Fusion	DLG2
	NOTCH3	Small Variant	Inframe	M1107delinsPHM
	NOTCH3	Small Variant	Stopgain	Q1256X
	PIK3R1	Small Variant	Stopgain	R162X
	RAD51D	Small Variant	Missense	G160W
	SMO	Small Variant	Missense	S590R
	TP53	Small Variant	Missense	G113V
	TSC2	Small Variant	Missense	E1435K
P17011-001-166	AKT2	CNV	Gain	1.56
	AR	Small Variant	Missense	G470C
	CARD11	Small Variant	Stopgain	E345X
	CCNE1	CNV	Gain	1.646
	CDK4	Small Variant	Missense	R82Q
	ERCC1	CNV	Gain	1.573
	ERCC2	CNV	Gain	1.732
	FGF10	CNV	Gain	2.457
	FGF8	Small Variant	Stopgain	E35X
	KIT	Small Variant	Missense	Q448H
	MPL	Small Variant	Missense	W303L
	NOTCH2	Small Variant	Missense	L2154P
	NOTCH2	Small Variant	Stopgain	E1595X
	PDGFRB	CNV	Loss	0.624
	PIK3CA	CNV	Gain	2.059
	PIK3CG	Small Variant	Missense	K205N
	RICTOR	CNV	Gain	2.175
	TFRC	CNV	Gain	2.126
	TP53	Small Variant	Missense	V140G
	TSC2	Small Variant	Missense	S877C
P17011-001-174	BRCA1	Small Variant	Frameshift	A1159fs
	CHEK1	CNV	Loss	0.451
	CHEK2	Small Variant	Missense	F115I
	CREBBP	Small Variant	Missense	A927P
	CREBBP	Small Variant	Missense	G549C
	EGFR	Small Variant	Missense	A943V
	ERBB2	CNV	Gain	1.557
	ERBB4	Small Variant	Missense	K355N
	FGF10	CNV	Gain	2.297
	FGF14	CNV	Gain	1.614
	FGF23	Small Variant	Missense	P174T
	KDR	Small Variant	Missense	L959P
	KIT	CNV	Gain	7.65
	KIT	Small Variant	Missense	D975Y
	LAMP1	CNV	Gain	1.776
	MSH3	Small Variant	Frameshift	Q949fs
	NOTCH1	Small Variant	Missense	T445M
	NRAS	CNV	Loss	0.645
	PDGFRA	CNV	Gain	7.257
	PIK3CA	CNV	Gain	2.14
	PIK3CA	RNA Detected	Fusion	TBL1XR1
	PIK3CA	Small Variant	Missense	M1I
	RB1	Small Variant	Frameshift	T12fs
	RET	Small Variant	Missense	P766L
	RICTOR	CNV	Gain	1.852
	RPS6KB1	CNV	Gain	1.729
	TP53	Small Variant	Missense	Y31C
