# Supplementary material for: Comprehensive Characterization of Human Lung Large Cell Carcinoma Identifies Transcriptomic Signatures with Potential Implications in Response to Immunotherapy
Source: J Clin Med. 2022 Mar 9;11(6):1500. doi: 10.3390/jcm11061500 (PMC8953709; doi:10.3390/jcm11061500)
Supplement: Supplementary file 1 [file jcm-11-01500-s001.zip › J Ramos-Paradas et al., Table S3.xlsx]

## Sheet: Raw expression data
SUPPLEMENTARY TABLE S3. Expression data evaluated by Oncomine Immune Response Research Assay
Supplementary Table S3A. Raw expression data evaluated by Oncomine Immune Response Research Assay
Gene/ID	P17011-001-07	P17011-001-08	P17011-001-101	P17011-001-113	P17011-001-119	P17011-001-12	P17011-001-127	P17011-001-131	P17011-001-132	P17011-001-145	P17011-001-15	P17011-001-16	P17011-001-166	P17011-001-174	P17011-001-19	P17011-001-20	P17011-001-38	P17011-001-51
PTPRCAP	123	31	114	70	10	125	136	48	80	52	29	73	30	38	40	27	46	60
KIR2DL2	0	0	0	0	0	0	0	2	0	3	2	0	0	0	1	0	0	1
CTAG2	70	0	125	1	2	0	0	3606	11802	46	55	1	12	1	21	399	2124	2703
FAS	782	3561	2455	629	410	1133	817	1717	1199	968	9035	2226	665	420	2763	199	2019	1124
ARG1	2	6	16	0	2	1	4	0	3	155	60	1	4	2	7	10	12	4
BRCA2	309	731	705	921	805	884	990	727	3438	1332	410	921	1659	1655	818	5306	1797	1011
CD3G	1273	867	1784	956	472	2051	1622	801	877	1146	976	868	280	771	1067	79	2839	678
CD40LG	157	23	180	64	49	121	183	44	21	155	188	83	50	111	30	3	49	99
CDKN2A	1170	115	591	4775	11278	5328	487	9169	8479	5032	2013	108	26061	12066	83	11258	3625	8000
GUSB	5416	3529	12177	12130	9717	6193	8696	4797	15183	19757	6401	4731	14655	8229	12535	8576	11137	3820
HMBS	459	960	1481	2197	3629	486	1375	2559	3379	1600	427	562	1131	709	497	1987	2725	933
ICAM1	3924	19067	21711	6912	3229	4627	6127	6186	4769	9319	25668	6142	1746	3274	8624	546	1964	9697
IL2RG	4872	2441	13830	3387	1345	4167	6509	1782	1423	3165	2449	2691	728	2863	1881	291	1262	3380
ITGB2	17713	6942	18954	9749	5071	7926	7071	2736	2881	5778	4002	6985	2156	10335	2355	996	16588	4338
LYZ	47605	25518	33652	34201	30481	72446	49113	21612	21058	28069	34073	31416	5882	34315	20650	3453	24230	34395
CIITA	3827	5336	6213	1630	1169	3943	1819	2150	1482	2041	10216	2843	837	2594	2046	246	2023	2133
MPO	12	23	60	27	61	212	26	29	76	10	125	28	62	35	10	0	241	47
NCF1	8770	1669	5231	3225	2385	4063	3720	3367	2276	1684	4793	2918	883	2823	1389	446	1754	3486
PTEN	2092	4725	5921	3238	8375	2206	3539	4696	11558	6337	4784	5172	2770	5280	2167	8066	7770	3601
RB1	1130	1640	4521	1855	1119	1018	2246	3221	2137	1014	2381	2197	856	6777	2542	7927	3900	920
CSF2RB	3937	2155	7378	2116	1435	2794	3586	2220	1349	1750	7379	2401	860	1976	2453	396	1990	3715
CYBB	23043	12967	21443	10919	7094	9850	12085	5845	4893	8455	7358	9590	3075	10913	3243	1287	4929	10852
EGR2	2538	670	4484	917	1080	1158	1601	804	4644	4665	4092	2839	576	1696	464	782	1401	969
G6PD	3095	2204	4828	17047	27935	1940	4593	22531	9759	2654	2045	5427	6021	2233	2790	73811	5408	15139
IL2RA	539	1846	2631	1474	1100	1127	2551	810	1153	345	1307	1283	258	1397	771	210	643	775
KRT5	128	965	50	32	10	535	100	150832	3360	987	1977	135289	585	23212	251948	153484	15118	340
NOTCH3	4863	8694	18247	9492	7710	9015	6140	13070	16736	4927	5115	25651	7070	40495	7206	15897	21949	18437
PECAM1	142	448	247	151	62	231	134	154	132	334	462	79	143	63	126	51	78	160
TWIST1	195	269	414	181	648	118	115	442	4926	33	92	394	15	91	3098	44	1765	104
C1QB	43673	17765	33634	32660	20999	17780	20873	6742	10692	17626	12663	20598	10873	33587	4314	3048	15063	11942
FCGR1A	4102	704	3822	2090	1731	2153	1316	1289	750	1216	1024	2187	731	2853	372	325	2998	1355
FCGR3A	11182	5815	12150	6798	6182	4715	5717	2113	2881	8319	2921	6413	3611	7478	1432	927	11683	5243
FCGR3B	1082	747	3382	511	400	468	594	203	195	387	510	717	316	670	334	141	250	1320
IL10	193	181	182	66	105	169	132	81	58	111	156	70	47	441	98	28	404	108
IL1A	60	3989	59	8	8	137	16	683	19	140	617	190	7	40	1883	59	119	3498
IL1B	701	10781	2075	686	769	2832	827	3399	514	1597	4127	1641	148	889	2727	390	575	2954
CXCL8	763	11151	22226	1691	5942	1175	7229	14417	5522	2678	31817	10467	701	4245	16291	549	9306	39751
IL15	87	198	129	31	29	129	83	71	51	127	264	79	37	60	101	145	184	45
IL2	4	5	19	2	3	5	6	0	6	5	19	4	3	5	6	0	5	2
IL4	1	1	7	0	0	1	1	0	0	3	4	1	0	0	0	0	0	0
CD14	18780	9271	16611	10187	7361	8862	11593	6591	6566	5777	6991	11727	3360	6338	2512	1418	22485	8558
TAP1	6944	9924	13126	14868	11509	9534	7571	8677	4775	6051	6283	11855	6304	5901	24962	1827	12729	6807
TNF	240	262	353	82	66	202	81	172	50	177	275	168	31	182	758	14	120	391
IL6	397	467	1967	196	839	306	1128	840	489	1304	19187	786	394	144	1182	111	1771	2116
HGF	780	329	1970	878	222	274	611	239	1113	1059	881	474	744	286	283	294	1653	648
CD44	51	634	124	17	74	19	24	5796	296	151	981	1489	48	99	971	3435	525	175
CD4	8554	4058	10365	5311	2781	5154	5788	2439	4438	6147	2665	4953	2445	6042	1596	861	7994	3239
IFNG	37	105	51	98	100	110	46	113	44	33	168	48	18	49	65	3	10	53
NOS2	0	33	0	0	0	14	3	118	16	23	157	0	2	23	93	139	0	0
BCL2	1499	264	1710	338	1244	4905	2132	1501	2585	796	1410	1106	3261	16233	1003	1750	1055	573
FASLG	223	145	261	361	261	324	182	153	179	307	160	127	69	127	110	29	135	137
SELL	195	361	1055	289	95	359	609	230	61	238	648	260	159	160	291	111	449	458
TGFB1	6404	6239	10272	8367	14193	4603	5124	7519	7953	5963	5211	9710	2425	3829	6790	7864	18594	4260
ADORA2A	1192	1743	1364	348	258	719	899	401	678	490	915	475	1263	273	238	217	694	1183
CA4	246	19	47	5289	13	33	26	12	48	311	1540	16	213	5	7	87	8	20
CD3D	1678	1177	2314	1197	583	1947	1646	929	801	1182	1022	1279	265	1075	1399	107	370	987
CD3E	2052	858	2994	1460	889	2216	2540	1046	926	1635	974	1091	404	1179	1250	146	332	1118
IGF1R	2364	2056	5013	3999	17611	6198	5623	18565	47158	10885	4924	15014	5017	20882	3199	17758	3534	5487
IL2RB	2322	1297	4266	1669	1277	3197	2224	2406	953	1540	2153	1896	845	1571	1843	324	1035	1662
IL7	119	377	183	28	75	91	118	87	76	531	276	287	39	76	210	12	190	233
IL12A	43	96	59	25	58	157	99	148	55	334	333	79	123	77	20	81	107	44
ITGAX	4289	1278	4136	1666	897	1596	1297	903	1317	1338	1435	1842	443	2347	604	338	8321	1647
ITGB7	1049	543	2147	778	813	1059	1166	491	712	673	813	999	349	597	473	112	794	1061
POLR2A	7554	5339	21803	27069	32367	13307	11207	8182	37097	18113	11436	8544	56323	15024	11167	21690	20525	16265
PTGS2	325	3237	3115	200	7744	197	10336	2360	2998	6491	14330	963	358	304	25907	222	2640	19257
GATA3	353	196	575	454	675	653	472	118	174	1044	475	280	75	357	331	41	279	293
TARP	570	97	369	200	159	556	369	172	145	289	1033	215	84	231	350	44	59	247
RPS6	31025	44732	131397	86859	120705	49668	76650	59448	125986	69396	70045	55446	81043	139733	40597	305600	101460	67265
MAGEA4	2	99	440	32	18	2	0	559	0	2291	9	847	5902	2	1292	136	2615	1879
AKT1	3197	4798	10379	8576	6201	3339	6728	3866	12466	5917	9705	5077	12106	5220	3104	6224	8769	4229
CD276	1240	2582	3081	2348	3987	1700	1199	2805	6740	1862	1030	3213	1843	2397	2173	1593	6067	2842
ABCF1	4355	4570	12633	25104	30795	9032	7356	8638	31423	14701	12424	5065	21747	9738	10730	12166	17959	9517
CD74	66564	15995	52469	28648	12769	27875	20423	5181	13505	25805	23466	29001	9821	27560	12660	2873	9108	21543
IFIT3	607	2751	1662	1066	1286	1104	1867	1666	963	1126	2540	1267	3857	1502	1542	205	1555	662
CD79B	958	82	1266	245	48	696	804	355	131	51	511	373	35	306	136	21	81	774
CD53	230	6	229	49	3	245	277	143	43	1	224	81	3	22	46	1	1	157
GAGE1,GAGE12I,GAGE12F	1	1	122	28	4	0	0	1	2	2	2	0	7	0	0	3547	14674	49031
NECTIN2	1154	1838	6191	3335	1281	1573	3253	738	3599	1087	822	992	5787	6135	1615	1913	1488	8933
LCK	21	493	14	81	774	206	53	52	2556	0	99	0	144	3505	90	2	81	0
TOP2A	3295	6806	6464	29085	14529	16584	15103	10393	54186	18062	4908	11149	66225	33097	7354	28353	26313	10614
VCAM1	4855	1995	14973	3722	2566	3614	5105	2592	2495	3352	5429	7308	1733	3849	9896	288	4960	4356
ZAP70	651	460	1280	369	213	1248	696	306	320	367	2605	474	135	341	558	49	128	532
LILRB2	1697	867	1512	1065	1093	945	1536	471	353	547	1153	977	384	1254	559	193	1768	951
LILRB1	1081	303	512	409	493	472	583	261	114	220	511	16	216	546	86	103	539	613
XAGE1B	195	12252	66	3	1	98	17762	9	7	4	1188	5	30	0	2	1141	4727	12
ENTPD1	3261	1837	6657	1336	1060	2312	3171	1028	2111	1908	2244	2600	598	1527	2411	531	2368	2563
GPR18	101	56	295	61	38	96	89	80	34	106	140	116	25	184	54	2	13	105
GAGE12J	0	0	1	0	0	0	1	0	0	1	4	0	0	0	0	36	5798	200
GAGE13	0	0	0	0	0	0	0	0	0	0	0	0	0	0	0	5	59	308
GAGE10	0	3	1	0	0	8	1	1	0	1	3	0	1	2	2	0	6	32
HLA-F	655	987	1512	1023	314	692	693	318	371	569	452	827	252	334	1531	134	853	366
JAML	355	264	240	96	62	64	178	90	66	311	162	134	66	178	122	36	118	104
CCR5	1565	924	1955	958	790	1182	1088	419	551	1437	885	868	391	1160	616	61	993	624
LEXM	8	15	14	1	16	16	7	34	3	130	42	26	8	8	12	40	7	75
CCR2	545	483	811	323	121	263	603	128	98	374	172	370	234	270	64	38	110	677
TFRC	6644	8695	20141	57559	21314	17326	21346	35796	103617	80528	15033	28855	179077	28419	35561	167115	16011	15598
EIF2AK2	2390	4476	7078	6587	5042	5585	6608	5923	14724	9850	5709	4993	9161	10187	6808	9638	10211	7484
ALOX15B	852	478	500	326	142	252	412	141	305	230	1730	276	102	716	105	74	102	186
CMKLR1	45	9	240	30	118	15	105	36	26	7	27	35	10	28	13	2	0	30
ITGAM	2834	2053	1298	1255	783	1112	1395	542	950	1244	1692	1193	384	1625	164	174	3381	1024
CD244	191	116	290	142	75	77	140	88	60	268	224	168	55	82	134	33	98	145
VEGFA	2706	22820	35828	2954	12873	5481	10361	4926	25128	12629	62284	5672	11098	6500	4845	5752	9883	14876
ZEB1	845	840	2482	1791	783	1022	1505	949	2159	1903	3093	1009	682	548	1133	1002	1840	825
MX1	2502	8509	4269	2278	1835	8954	10319	5071	1397	3286	7015	3678	21334	6673	3691	1140	8246	5596
CD19	474	92	720	180	17	701	505	444	142	14	1912	262	6	44	126	22	31	415
FCRLA	1403	30	362	68	3	876	602	115	36	13	321	157	13	22	28	22	17	333
TNFRSF17	1445	130	845	296	42	944	1426	313	83	10	244	724	56	71	69	43	32	635
HLA-DQB2	133	90	99	90	33	289	77	9	8	75	79	535	32	85	54	0	34	29
PRDM1	5966	1137	9472	1643	2417	5956	8896	2731	22784	5241	2744	5349	734	1246	3381	1323	2577	3843
PTPN7	1779	801	2759	1110	463	1920	1963	734	637	896	1505	1081	213	4413	495	105	785	1040
CD27	3314	228	1878	563	135	1191	1941	352	366	199	534	1171	57	261	284	62	68	719
CD40	1693	3175	4428	9394	969	1354	1555	1663	15277	2058	3888	3368	1843	1639	2396	245	1974	1933
CD68	29446	14350	24962	25089	18028	13033	14199	10144	14172	30883	10685	14225	6951	23914	4706	3814	70890	13572
CD70	108	760	194	133	77	104	138	67	97	75	115	90	17	2902	134	9	26	96
CCR1	2946	1303	2320	1227	914	852	1254	542	686	1556	1044	1050	560	1210	346	223	3546	1470
CTAG1B	30	0	3	0	0	0	0	0	0	0	17	0	1	0	0	5729	4727	1031
FYB	3180	6623	7180	2067	1432	2805	2773	5673	1548	2435	6738	2664	685	2149	3359	365	3805	2333
GAGE2C,GAGE2A,GAGE2E	3	2	107	24	4	0	0	0	3	4	0	0	8	2	0	388	19380	51057
CXCR3	34	28	29	18	8	28	19	5	9	31	6	19	5	10	7	0	2	19
CXCL1	174	18611	11101	191	638	597	1447	5333	467	1041	9222	7851	1153	474	9602	83	1782	3342
HIF1A	6077	35772	43718	7392	4097	14890	8356	12300	18316	6822	19108	16406	16666	16345	14839	30403	22770	13297
IFIT2	1127	1471	1588	1174	921	1131	2772	1502	561	1120	1716	886	5371	1250	843	342	2030	1058
IFIT1	1204	2808	1108	4099	615	1277	4586	1980	362	1742	2669	944	6458	1124	1213	297	4401	1028
CXCR2	183	145	2233	14	77	149	169	229	15	206	290	75	98	50	183	477	86	330
IL10RA	4729	2520	6927	3298	1960	6022	5198	1820	2685	2385	5387	2861	1142	2367	1594	387	4113	2381
TNFRSF9	347	2391	1046	563	509	629	529	713	501	362	502	530	64	369	917	64	606	442
IL18	1373	3254	2583	2055	622	3814	1210	6189	721	15617	5336	2517	693	2364	846	195	1495	3453
CXCL10	2034	10993	3084	4788	3805	3611	2485	6422	1855	1824	4936	5697	1933	4304	8244	365	869	1909
AIF1	3482	4370	5157	3098	2946	3008	2860	2021	2358	2540	4203	3926	1205	3389	1588	602	8820	2437
BCL6	2180	4277	12463	1136	1702	2821	4674	7135	19108	2927	13134	5253	4681	1934	3940	15832	5821	4544
CEACAM1	238	2829	9594	136	12360	504	926	243	1590	4280	838	222	974	1749	2858	189	368	857
CXCR5	183	31	616	52	30	179	149	150	45	33	165	128	14	71	89	4	0	260
CD1C	53	35	111	22	11	9	28	33	11	117	42	42	12	21	38	2	37	31
CD1D	166	107	508	92	160	104	421	75	104	56	101	169	39	96	57	154	177	170
CD2	2635	1847	3849	2371	1452	4269	4043	1382	1230	3078	2596	2119	650	2899	1979	222	584	1646
CD22	399	109	1049	81	27	343	197	397	128	94	1576	211	54	162	145	16	157	544
CD33	564	229	355	190	136	226	200	87	137	208	349	293	83	233	84	38	708	134
CD37	6719	2164	6393	2167	1218	4656	3087	2254	2187	2172	6498	3252	813	2533	1383	417	3892	3377
CD38	1947	962	3592	2127	795	2566	3431	2547	612	763	796	1394	424	797	653	2469	549	1640
CD47	6117	19817	22687	2909	9690	11588	7638	7952	26376	9091	11898	13191	7306	16836	10686	4964	9316	12245
CD48	1387	540	2350	940	408	1417	983	662	620	445	837	1059	211	770	673	109	1128	1007
CD63	24147	25424	59661	40350	33402	15536	60913	24423	31897	32589	19676	18634	38495	22843	12772	20337	67811	25349
CD69	492	388	1379	318	178	505	737	233	229	883	1718	258	227	327	717	57	175	478
CD79A	12279	483	8610	1939	87	7627	6114	1602	1712	81	2292	3790	169	339	501	175	121	4428
CDK1	831	3886	3603	13254	12823	2381	3550	6605	19995	4835	1448	6663	22720	19015	3145	9589	12759	2786
CD52	12835	2813	8299	5131	2507	4272	3717	2481	1901	7519	12109	3389	1833	4628	1878	685	14885	4148
CEACAM8	1	1	8	0	0	0	0	1	0	3	30	0	0	0	0	1	13	0
CCR7	553	322	3218	563	136	1007	861	355	333	514	864	633	135	524	387	50	81	1075
FOXO1	2014	1879	5594	1044	1501	2061	1910	2622	12019	2781	4661	3083	925	1019	4612	5114	1339	1958
FUT4	164	203	310	191	735	194	174	144	1180	1034	134	166	336	279	133	105	645	479
GBP1	3250	9776	10582	5376	5466	7821	4698	5812	5490	10439	9810	6780	2898	5336	11865	524	4120	4807
GZMK	1280	315	2728	1229	382	1028	852	147	319	1591	613	721	71	529	684	37	87	512
HLA-A	14	47	96247	71451	3359	7	55234	4041	6	70	18308	106111	91038	26	98113	19163	85001	52947
HLA-C	24160	59021	93055	26507	10330	95212	67455	27026	20965	33938	48591	47504	45701	13002	73253	21326	52720	27864
HLA-DMB	104	29	1821	908	28	33	34	18	34	27	389	45	10	2949	21	4	1167	23
HLA-DOA	2718	1240	2995	2135	985	1661	1077	597	754	2078	1264	1304	566	2285	535	152	587	1319
HLA-DOB	1406	570	1180	242	82	1318	1293	377	214	289	1011	456	79	121	776	56	395	501
HLA-DPB1	40758	20725	37440	18141	12233	26342	14947	11099	11131	23237	29741	22204	8450	23766	15399	2654	13005	12970
HLA-DQA1	11568	5502	22426	4955	5027	9116	11256	5059	2512	12638	7007	16137	2248	139	6221	1011	2935	6734
HLA-DRB1	131101	80572	114293	30261	13840	31872	43340	32525	21843	67368	41317	81883	22068	27221	58171	4486	58409	47082
HLA-G	348	175	279	22	6	9	6	15	207	82	49	29	29	3	21	0	278	6
IDO1	471	4685	3416	867	1054	1061	875	2720	1142	760	1805	2692	573	632	7335	299	293	767
ID2	2902	1716	9917	6449	9405	5712	2182	1043	17662	8619	5530	2057	9016	8263	2014	3461	12325	893
ID3	1122	856	8190	9242	8096	619	636	389	32081	790	2251	1887	1062	735	1213	3044	16446	2189
IFNB1	0	8	5	0	0	4	5	4	5	2	14	2	6	7	5	4	3	2
IL3RA	664	1059	1650	677	601	489	1096	507	698	978	3741	380	485	603	833	126	549	809
IL7R	2469	4615	7324	1986	1415	3389	7730	2178	2770	2637	6799	2857	1173	2540	3596	869	1077	3809
IL12B	1	16	21	8	1	10	3	1	1	39	27	9	1	5	3	0	0	6
IL13	1	1	17	0	3	4	5	0	5	30	23	3	0	1	3	0	1	0
IL17A	12	0	3	1	0	14	3	30	0	4	6	22	11	0	5	0	13	2
IRF1	4583	7185	9162	3889	4792	5944	3979	4020	5483	6905	9823	7462	3729	5110	5471	1956	2228	4648
ISG20	3246	1789	5324	1145	1972	3804	5142	1694	5883	677	3828	2061	1703	929	1412	236	2627	3981
ITGAE	505	582	1499	1271	2825	748	407	684	3482	495	899	537	1850	1085	770	1922	1277	888
ITGAL	3149	1275	4799	2004	1035	3126	2575	1022	1081	1996	4107	1731	585	1854	1002	200	739	1280
ITGB1	18390	47039	65084	35018	40182	37018	36837	22395	36085	32839	40838	33957	70765	48579	21526	22603	61505	55912
KLRB1	621	186	1395	116	237	804	949	583	277	846	473	450	131	331	355	66	119	498
KLRD1	299	253	527	426	216	464	348	181	181	313	438	279	116	155	462	804	116	275
LAG3	393	492	1163	1402	473	891	817	299	264	196	578	342	153	227	362	69	169	315
LRP1	27264	11553	53804	22787	13546	11101	19138	17529	24407	34611	9774	29590	11280	15457	15200	15396	58786	15621
LY9	308	34	352	91	36	332	251	110	43	62	312	147	21	79	46	65	36	145
SH2D1A	325	240	1098	355	208	679	541	141	168	358	470	295	99	233	381	23	50	297
M6PR	6851	6283	13751	14286	16779	13940	7550	11532	15023	10106	7180	11369	19703	9945	5895	29402	14116	7101
MAD2L1	537	1994	1526	3690	4879	1448	1337	1104	8233	1602	621	2772	5271	2573	2277	3860	6854	1493
MIF	10239	26116	29307	38519	88410	21464	16651	34364	68905	14121	12793	23352	25632	22423	14249	86560	57424	33888
CXCL9	6166	7778	11920	22138	29453	12653	5977	7689	8299	5276	8854	10453	1121	13794	8273	543	1639	5013
MKI67	1203	6473	15016	6548	17561	4995	9482	9190	42707	13640	2982	14988	24998	16280	10274	16399	12211	3806
MRC1	9320	13076	5602	3514	2838	1970	6279	1094	1924	10050	7866	2363	3175	6066	1268	237	4822	2139
IRF4	5623	519	2452	799	126	2254	5469	1167	281	158	1202	2697	123	203	425	80	109	2370
MYC	2821	6374	9366	3519	51027	2471	9875	17659	56172	3172	13121	14933	586	25555	8356	54659	18626	9108
NT5E	482	20941	1252	375	315	428	746	206	373	739	2143	428	162	446	268	60	1793	465
PGF	632	807	1866	1842	500	669	781	2964	2160	870	420	6332	1794	1314	1170	309	5011	782
SRGN	11439	12976	37951	13807	9918	14237	18602	7109	7884	8512	25991	9073	4302	8643	10634	2531	24653	14871
MAPK1	2876	4915	18086	7678	11614	3111	3727	5269	19396	6914	3434	5934	8606	4385	5198	19675	9598	6636
PSMB9	3309	5218	5383	5570	2062	5945	3592	2879	1798	3548	6503	6418	4018	2205	11453	798	4602	2874
PTK7	3517	5309	22139	15430	26796	14260	4986	9577	51542	6593	4877	8484	21451	29098	11824	7137	12320	3673
PTPN11	3885	8056	12406	14018	15958	4459	8573	8488	38801	8124	8346	8184	22348	11714	8475	14809	20531	7389
PTPRC	1738	196	2784	523	81	1226	1369	669	332	448	3384	601	254	281	339	111	489	1442
PYGL	1603	3697	3132	7077	2893	1208	4564	3686	26392	2667	3939	4209	4086	1213	939	7256	8980	13319
S100A8	1016	9286	5821	791	664	2819	1498	31796	444	18628	7538	1874	581	680	6570	1355	2042	61313
S100A9	3827	63724	38417	2383	2066	7139	3800	138716	1819	104118	19446	5057	1711	2173	9862	2789	8635	200001
CCL2	3463	2203	4204	1692	3469	1922	2308	2096	676	5488	24633	3376	1035	3248	2283	277	15238	1668
CCL3	1471	1310	839	1214	1100	665	850	1263	561	1127	3752	464	185	2595	573	91	1395	1096
CCL4	2056	1739	2708	2606	2042	1274	2496	2280	1085	1821	1845	1220	339	2618	1212	273	792	1835
CCL5	3262	1672	4169	3931	2209	2869	2341	950	1696	1963	2272	1512	745	2122	1548	295	711	1948
CCL17	33	236	44	13	0	31	61	179	50	101	170	9	20	13	24	26	4	44
CCL18	12180	8607	8313	3977	3419	2728	12351	6427	2745	3692	4234	8962	10123	8972	851	1370	5284	10883
CCL21	1862	587	5697	537	1553	1025	1955	1047	501	1302	927	3370	996	1103	744	46	1062	506
CCL22	262	626	559	222	80	335	642	370	258	448	332	334	198	208	554	82	4	2088
CX3CL1	620	3881	995	566	599	1526	1122	1835	974	2133	5834	4711	513	465	3140	273	584	429
SNAI2	945	936	2081	224	1130	818	616	4430	2943	390	751	7381	569	725	3248	4584	10905	840
SSX2	70	2	0	0	0	0	0	0	0	0	0	0	27	0	0	0	1	0
STAT4	125	217	215	170	79	285	285	149	80	148	570	91	140	94	140	17	65	333
STAT5A	1931	1526	3120	965	975	2105	956	838	1367	1479	2332	1565	2380	1931	1323	242	1841	1388
STAT6	4215	6520	14254	7406	1210	5253	5669	7139	8616	9075	7930	8510	12431	6906	6080	16625	7353	7631
TBP	669	806	1683	1187	1705	1856	960	731	5779	1580	1627	977	2222	2374	733	2404	1378	1014
TCF7	595	205	1219	902	1445	781	483	547	3384	544	877	404	644	349	799	88	666	1336
TLR3	306	309	430	110	132	230	181	135	241	519	273	621	378	334	427	210	327	640
TNFSF4	236	98	781	104	238	279	817	125	271	414	96	204	70	332	114	89	49	103
TNFRSF4	249	246	871	273	181	342	595	218	213	225	216	268	111	369	142	62	247	289
CXCR4	7654	3797	38864	5788	4470	31437	13443	4292	26434	16151	21468	8250	23603	25617	7321	3443	12835	10464
IFITM1	17167	28003	206937	26976	13435	31140	61406	16921	17591	8990	32726	35081	12807	15371	21611	6291	26217	18392
TP63	64	263	89	24	0	48	23	17	11	175	120	177	7	11	171	2	0	17
TNFSF14	6	102	210	15	2	11	10	35	19	6	343	8	12	9	14	3	7	50
TNFSF10	3000	10625	21690	2169	1521	10824	4769	5482	27230	7641	14446	35420	8809	3228	19601	33787	3251	2826
TNFSF9	47	173	113	159	127	34	23	204	252	29	76	65	21	310	99	77	65	363
TNFRSF14	2997	2658	5740	1812	2156	2611	2040	1705	2681	2384	3218	3207	1297	2074	1246	281	2775	1407
NRP1	6011	17775	14471	4922	8005	3376	17094	3050	6935	7715	7329	7763	4890	4665	4218	1099	22477	7063
SKAP2	2932	5349	9657	3863	4836	4408	2887	2533	7842	11224	6139	3731	7540	2925	3548	5902	5882	3076
FCGR2B	878	180	656	231	99	441	532	144	262	146	234	321	35	113	80	16	118	359
CTSS	21268	11608	22217	10235	7109	13011	15318	5751	6399	12246	10741	10498	9549	13410	5974	2314	21955	13606
FCER1G	19521	10812	19826	11658	10323	11504	9832	6511	8888	8587	9521	10496	3665	13470	3972	1814	27353	10136
GZMB	1115	1571	1153	1871	1289	2218	1730	914	705	729	819	968	274	700	1848	184	262	1010
SDHA	3611	5098	7479	7370	15981	6445	6150	7153	30566	13335	5682	6196	34906	16526	3706	9292	7593	13712
TNFRSF18	229	345	342	207	307	374	367	812	2303	134	153	1951	1999	477	1714	1171	195	195
CD83	1822	831	2450	2019	584	1708	934	866	2841	3884	2016	930	2722	1964	828	734	2407	754
CD163	9032	9119	13859	7975	4470	3731	8917	2584	2429	4640	2292	5461	5620	5554	1040	708	54577	5563
BST2	7654	15618	20860	11437	5431	8127	26863	5848	5616	4450	10135	20100	6414	8942	16550	1058	15575	5326
BUB1	902	2031	2275	6575	5826	3853	2949	2648	12138	4831	1368	4957	10762	6711	2294	5759	7604	3774
CCR6	170	156	616	49	53	220	227	156	65	309	217	340	108	122	131	28	55	294
EGR3	421	260	3014	174	581	218	593	754	942	1813	1123	418	234	314	621	297	791	445
MMP2	32209	11429	65664	5659	22171	23547	35754	60486	30416	18718	12572	62478	9094	8013	33624	4653	35812	39371
CCL20	88	43215	5765	160	752	564	1375	3623	1578	5009	6608	2709	82	551	6348	170	610	180180
CCNB2	497	2405	1794	7986	7860	5705	2733	4536	16479	7571	1866	3525	9289	8441	3340	7998	8798	3288
GRAP2	744	382	1039	368	523	742	545	399	1527	729	2290	460	336	972	418	77	269	444
NCR1	23	25	86	46	19	44	31	21	16	46	65	20	5	6	62	5	20	26
MTOR	1492	2117	5343	8751	7244	3730	2551	2358	10649	4704	2413	2395	11401	5128	2916	3949	3974	5048
MAGEA1	329	0	273	13	0	4	122	4	761	262	16	4	1	1	6	809	4933	61
MMP9	10752	13356	12747	14128	3608	5678	7593	8262	12741	7929	3653	4596	2422	3280	1439	476	238140	5818
PDCD1	149	103	217	169	126	285	234	139	426	100	185	142	25	102	83	15	30	120
PIK3CD	1331	1115	2965	907	1025	1329	948	1822	504	826	1759	971	312	1022	544	376	1101	1074
PRF1	512	331	1384	815	569	524	630	338	337	362	757	415	133	296	557	118	185	445
RORC	321	1006	2958	78	51	935	2574	83	552	5268	1046	47	2275	753	56	22	111	5332
TNFSF18	156	22	138	56	46	139	175	168	84	568	28	28	65	224	42	783	32	11
ISG15	1461	5673	3165	16072	7034	5315	11645	3688	4650	1435	3313	2521	16534	3961	2192	525	14830	4041
CD80	478	1433	730	510	271	694	534	395	307	499	2445	320	270	552	506	60	835	262
CDKN3	249	1513	1878	3132	3959	792	5739	2688	2231	3787	535	1929	8075	3237	1083	3468	5584	1576
CSF1R	5637	3443	8550	3506	3811	2483	5081	2038	2236	2957	2121	4720	1727	2887	1554	533	9944	3038
CTLA4	384	449	826	412	250	758	853	245	15106	169	364	347	93	307	610	34	371	257
EFNA4	124	510	470	1509	724	1147	268	738	2049	253	387	457	394	1393	1000	634	489	1609
EGFR	1216	5120	4688	121	254	2206	2783	14497	4525	15229	5445	20615	6998	1588	17601	10974	2793	4186
MAGEA3	242	215	202	2228	5	104	59	1163	3926	2006	74	23	2587	2	539	691	1750	1213
MAGEA12	87	115	136	67	0	11	4	122	2	525	10	18	953	1	369	1	753	313
CXCL11	248	7094	408	908	582	1676	706	1591	422	340	1576	655	299	3762	4438	60	279	293
EOMES	276	97	552	306	162	319	185	93	286	334	128	177	45	204	143	49	180	106
CCR4	92	81	466	107	33	125	267	124	70	184	218	67	19	112	178	16	15	90
MLANA	1	0	0	1	0	0	0	0	0	0	0	0	0	0	0	0	0	0
HLA-B	36	3699	8034	171	69	42791	35372	16551	121	194	9354	2643	4409	28322	9069	649	39798	2931
HLA-E	52183	29341	96296	46363	38081	54290	40789	44270	26115	87485	99912	52291	23018	33994	70847	17464	51885	32989
IFI27	3515	12383	9298	2126	1364	7903	9120	2843	6580	1607	10071	10333	20655	14922	3887	341	5434	1254
IFI35	1687	3061	3370	5718	1868	2607	3666	3288	1145	5106	2444	2105	2848	1487	1232	1528	4267	2634
IRS1	515	1556	1690	3295	1644	555	4009	5081	6377	4889	677	2674	407	620	1394	2270	1422	1196
ITK	605	517	2048	710	254	1610	1102	518	356	778	3672	440	168	478	710	55	158	544
KRT7	2377	25788	14894	139	10732	10093	16657	1471	3719	12090	25866	551	11219	35304	2777	332	597	51975
LAMP1	5291	3664	12595	4312	8977	3988	5138	164312	20376	10346	3637	8034	6262	7810	7348	6222	8494	5854
LCN2	259	12833	193558	688	34	7472	11442	32591	676	27617	4790	4906	944	2630	35098	3748	1444	36335
NKG7	1452	776	2806	1917	1143	1400	1068	1056	733	1091	1190	904	345	728	1077	177	533	1035
TDO2	296	1988	1007	184	33	1825	351	1982	357	254	1067	911	224	577	464	110	507	960
EBI3	85	149	219	1797	63	141	118	86	85	240	76	178	39	80	44	37	41	170
KLRG1	279	310	498	576	362	718	383	211	292	609	652	238	120	605	270	183	333	181
IGSF6	4293	1798	2889	1899	783	1922	1464	865	690	1936	1619	1734	526	3176	475	251	825	995
SNAI1	388	870	2034	3952	2920	307	294	199	6219	799	779	513	1784	1001	714	220	3110	816
IKZF1	3644	1475	5268	1543	1164	3454	3715	1557	1391	3256	4472	2087	801	1551	2017	542	1415	2048
IRF9	2503	3780	4862	2126	1835	4571	4765	4393	2647	5004	4285	3974	5584	5018	1920	939	3919	3122
HLA-DMA	10193	5585	9238	3636	2494	4862	3152	2415	2765	3573	8154	4734	1835	3984	3452	622	8021	3187
CD28	701	265	1182	383	192	605	549	214	199	510	353	424	172	319	236	58	666	325
GZMA	1692	1068	2254	2013	1124	1417	1403	746	637	1773	810	1274	223	806	1058	232	372	721
NTN3	5	1	27	854	86	58	8	52	180	33	10	16	78	38	12	4	8	4
OAS3	1465	5084	4169	2587	2471	1948	6475	5386	15649	4431	1900	3102	7597	3138	4390	1447	8364	5437
PIK3CA	1491	1526	4306	1792	2221	2497	2179	2760	9118	3835	2439	8685	9022	10619	3093	16336	2882	3088
POU2AF1	7391	602	6759	1563	166	8098	9178	5947	997	95	1769	3761	306	544	542	285	150	3679
BATF	703	2022	3668	617	567	1614	1548	762	586	344	3491	1359	181	747	820	99	1655	1142
CXCL13	1236	1628	4361	2100	566	6794	8598	5436	1540	621	12452	3014	488	1816	118736	285	3159	5771
GNLY	1112	764	1409	2117	1956	2023	2286	1284	1032	987	2452	847	294	1256	2560	240	815	690
IFITM2	5985	6609	41282	3132	6604	3485	16630	3943	7570	3186	15614	6961	3938	3576	5023	1510	15815	11684
PVR	1435	6680	6806	4505	7203	1112	4539	1677	8208	7328	4612	3049	7271	3256	2243	4110	3244	15092
CXCR6	620	239	903	403	358	507	412	182	172	437	279	270	68	416	264	35	39	231
CD226	315	377	684	517	321	742	485	301	302	502	555	305	205	542	284	212	497	382
TNFSF13B	1560	1696	3188	1883	2228	2402	2283	815	926	1434	1651	2113	890	1796	589	267	1989	1405
CD6	719	171	1244	313	183	722	705	271	401	575	1245	458	251	595	286	132	141	690
LAPTM5	34718	14743	50121	20865	14770	18213	14521	6237	10674	17691	14540	19048	8144	22354	6988	2420	56654	17014
IFI44L	376	9179	991	741	983	2599	2621	902	321	361	3155	691	2572	979	789	109	3165	704
PMEL	229	90	112	777	89	259	94	346	197	1062	98	91	379	1484	116	194	94	98
CD160	34	11	49	26	2	10	14	15	3	20	3	21	18	1	1	4	4	5
CORO1A	4768	2811	9356	4648	2137	3378	6231	2200	2103	3291	2031	3493	5319	2918	2473	418	3283	4173
LST1	1166	646	1316	604	234	463	299	233	317	632	877	679	242	536	263	99	387	226
BRCA1	300	1128	1052	3040	1734	993	1178	1210	6074	1139	675	1516	3755	2232	894	7344	2293	1282
STAT1	12796	20958	23558	33036	45807	36645	24992	20961	20360	23757	16984	21441	31504	26099	22290	7176	20684	21423
DMBT1	3951	1522	24243	83	30	18	178	244	45	1628	6811	842	1289	133	42	11	61	5788
KLRK1	623	679	1127	725	289	1043	495	464	397	548	3184	463	266	397	745	63	298	412
ICOS	219	280	595	201	77	436	306	156	114	295	352	153	34	242	299	13	60	136
TRIM29	15	162	3	21	1225	89	40	86170	49130	566	1006	18811	894	4509	49441	49602	4938	211
IKZF3	757	373	2259	510	194	961	1683	734	252	712	1142	592	1029	491	375	146	78	1207
TBX21	307	91	422	419	134	313	218	91	115	182	655	157	104	144	106	30	30	179
FOXP3	591	529	1456	580	227	913	1041	415	461	371	194	759	147	566	696	85	42	397
CD274	342	4703	947	403	438	476	532	427	351	449	2602	292	361	552	324	735	330	765
KIR2DL1	0	0	1	8	2	0	109	0	9	0	0	1	4	0	0	3	2	0
DDX58	991	3464	2787	1484	659	1888	3062	1105	824	2113	2746	1049	4830	5656	1742	713	2344	1428
TNFAIP8	898	2597	1284	841	451	889	1256	784	579	639	2956	765	356	1146	807	146	1817	1136
LAMP3	3965	1118	10806	386	123	546	2501	1572	904	3605	5717	7942	7106	1668	1983	27152	294	2638
SIT1	664	144	618	285	194	404	533	190	235	262	212	272	88	390	118	26	95	371
KIAA0101	289	2369	2070	9251	4936	1791	2250	3616	8139	7726	853	3001	3719	7078	2645	5184	6473	2536
MELK	219	2028	1471	1997	2001	935	645	1271	3707	1773	487	1300	7595	2695	902	5064	3310	74
ICOSLG	503	800	1109	391	427	619	399	1129	2113	735	860	532	630	699	855	303	863	321
SAMHD1	6598	5811	12077	4646	2622	5042	3265	2013	2759	3617	6256	6295	4097	3884	2757	2855	6896	4477
KIR2DL3	15	4	5	17	18	6	10	8	8	11	12	10	6	6	22	1	2	5
C1QA	19195	9239	15051	12962	8816	9311	10527	4844	7241	7832	6888	10230	3593	12407	2257	1315	9510	6984
MAGEC2	499	3952	140	1	0	29	10	0	0	47	311	0	17360	2	2	2	14508	1813
IKZF2	273	343	457	1164	944	598	768	1187	363	406	422	257	907	2046	658	1452	381	839
KLF2	2241	907	4727	1462	832	1024	1942	613	6730	1191	5589	1169	480	1005	1631	428	2938	2129
KLRF1	17	4	44	24	5	125	24	8	13	26	98	25	76	16	19	4	13	16
TLR7	1934	597	1845	371	270	826	786	361	192	1034	527	1011	438	1182	134	144	739	448
IL23A	35	666	120	24	275	1037	43	45	4655	35	396	61	234	6327	104	100	2705	460
OAS1	2063	4993	1970	2075	2813	2808	7158	3093	30685	3970	2291	1799	7772	3181	1474	808	23820	11373
OAS2	2183	6792	3449	2628	1463	2610	6372	3406	1053	1698	2135	3413	4134	2511	2961	361	6397	2762
TLR9	432	91	370	88	20	846	537	136	87	51	166	217	116	1233	40	19	29	234
HERC6	341	1835	800	723	190	826	1525	650	315	590	1303	349	2037	771	1359	152	1552	578
B3GAT1	33	18	49	8	1471	155	22	17	12	24	76	19	11	6	32	2	0	8
HLA-DRA	163446	94358	129249	85277	49597	116422	63518	41639	38921	108375	102965	77875	31662	116618	66697	9887	57750	58470
CRTAM	171	114	517	258	74	241	106	103	95	175	305	99	34	91	176	11	42	235
HLA-DQA2	3	4	9	9	6	2	0	1	9	5	13	112	4	55	7	0	28	3
SLAMF8	5246	1906	4006	3151	1986	1686	3097	1753	1869	1198	1083	2686	521	3437	645	291	3870	2394
IL22	0	0	0	0	0	0	0	0	0	0	0	0	0	0	0	0	0	1
NFKBIA	2419	10228	14460	2630	1974	3033	9808	6369	3917	7258	36032	5283	2759	2394	4946	8428	6022	20033
MAGEA10	20	0	14	270	0	5	0	14	0	625	18	0	6007	1	1	20	4100	7258
CD209	1301	1038	1551	980	2242	474	1273	397	599	628	439	1003	980	825	441	92	1766	740
SLAMF7	11504	3476	9176	6515	2433	9984	11939	2776	1932	1761	2349	5910	774	4553	1658	438	760	5100
IFNA17	0	0	1	1	0	0	1	0	0	0	15	0	0	0	0	0	0	1
IL21	21	6	49	16	11	28	47	16	11	5	27	41	2	38	4	0	0	18
AXL	2017	2215	2853	1426	534	1105	627	556	2281	822	1735	1910	270	516	1464	230	1290	1115
MS4A1	424	45	1328	144	11	319	549	747	120	85	551	230	12	106	200	7	7	1067
FOXM1	429	3084	2334	4539	8705	5447	2719	5183	15453	4021	2132	6396	10728	6179	4102	12216	5930	2192
C10orf54	4546	1670	6762	1819	1792	2811	4206	2123	2428	1980	2637	4265	1056	1281	2132	590	2636	3235
IFIH1	1329	4213	7712	3346	1063	2870	1574	2150	1949	3009	2504	1665	3742	1145	2375	668	3167	4556
IKZF4	56	62	270	153	184	66	482	75	154	141	103	61	389	220	44	184	44	87
IFI6	4923	17581	8645	22547	6124	23043	54305	6494	4555	16025	11102	5437	52894	9660	7600	818	32220	11812
VTCN1	0	18	26	2	0	320	2	149	57	14	65	215	204	29	258	463	29	79
ZBTB46	163	265	462	396	1134	391	155	137	377	267	547	132	94	69	100	44	330	238
PDCD1LG2	1485	1604	1537	1419	757	1264	1303	506	505	690	1981	900	346	1256	498	90	1197	1212
KREMEN1	557	1353	2506	711	5855	1387	2726	2024	80894	1593	1017	6378	3389	756	7031	14469	22270	1604
DGAT2	148	501	3534	877	3012	355	351	863	1392	17930	295	678	1126	1129	484	1217	397	683
HAVCR2	3117	2662	4414	2937	1661	2480	2083	1036	1403	1913	2267	2303	734	3016	954	366	5679	1408
GZMH	612	288	660	610	252	504	294	240	248	650	492	230	60	147	275	42	79	274
HLA-DPA1	46242	44914	37598	43674	14156	25568	35500	22128	24585	53611	45561	27629	19919	27484	28121	5602	29905	15683
GADD45GIP1	2262	3188	4996	12951	11206	3364	4278	7948	21680	4422	4642	4301	6786	21787	3285	5220	13183	5599
IL17F	1	0	0	2	0	0	0	0	4	2	8	0	0	0	0	0	0	0
LRG1	305	701	9618	296	108	130	715	1827	121	528	581	3111	457	801	843	85	116	5836
SH2D1B	25	17	86	50	10	28	41	26	19	85	105	36	31	3	54	14	27	124
TAGAP	3630	1054	6781	1329	607	3155	3509	1291	844	1496	2940	2189	669	1294	1368	210	788	3003
ADGRE5	4645	4406	7592	7011	6859	2810	6296	1568	8639	4083	8656	2937	1190	7482	1850	609	3221	3566
PTPN6	4414	2385	4489	2446	3621	4281	2559	2766	4305	3005	9032	3041	3228	2515	1383	5834	3936	2639
CLEC4C	43	187	150	43	2	82	68	21	18	85	65	31	77	52	61	10	21	20
MADCAM1	2	1	20	1070	25	0	1	0	41	2	21	4	0	2	23	0	0	26
BCL2L11	707	916	3535	710	3201	4231	1694	1249	5337	4960	1428	1593	3732	3884	1665	2153	1638	926
TLR8	953	348	1471	878	404	629	574	183	309	436	246	561	206	747	183	108	959	390
MAPK14	2734	3213	7749	8263	22688	3369	4515	5482	18849	14717	3979	3125	8363	7095	5003	5184	7851	7037
STAT3	7572	8378	28337	21143	13820	11765	16503	8071	16948	17685	11694	10577	17462	11854	11462	9050	11986	14935
JCHAIN	19415	4822	44632	4580	1109	36774	22047	8783	5515	1109	11090	10998	2336	4441	4764	1470	1032	12236
NCR3	36	6	79	16	2	56	36	34	16	9	27	32	11	17	13	1	6	67
CBLB	897	2275	3260	311	492	2362	617	745	6905	629	5615	1088	633	994	1225	1387	3513	1192
LMNA	12262	29201	38049	37646	14528	11760	18573	23442	66064	30977	86031	19008	19111	23205	36043	33784	54645	31471
CD8A	1365	955	2306	1594	780	1846	1029	549	1535	1073	1037	800	241	832	1525	191	508	723
CD8B	270	204	533	306	4466	531	456	178	43453	314	577	204	233	595	432	34	4591	199
NFATC1	327	338	682	163	110	385	231	913	533	601	359	455	104	689	482	614	350	175
TIGIT	666	560	2765	846	476	1638	1147	671	464	601	666	869	148	630	938	85	133	586
CD86	2431	1391	3416	2187	1446	1747	2361	726	894	1718	1024	1500	818	2118	983	271	2575	1313
TUBB	33900	45341	91882	212420	250481	84238	47599	62455	210598	99415	43455	58895	195937	120988	113142	109427	168604	81872
NCAM1	939	15	180	60	128	1915	145	22	2673	87	570	76	12639	3896	32	38	515	52
ITGA1	2234	4330	9094	5369	5568	1544	2620	1501	5914	4899	11571	3043	4537	1938	2504	1315	17885	2928
BTLA	274	210	729	168	45	735	619	268	145	112	1001	235	114	178	152	86	18	331
BAGE	71	437	0	3	2	2	0	0	357	2	40	0	900	0	1	14	179	0
IDO2	0	9	45	4	0	3	5	5	3	9	16	12	8	1	12	0	0	7
CD247	769	585	1844	675	376	1464	1322	532	416	819	1316	520	197	538	636	114	93	536
TYROBP	29067	8483	17187	12303	9566	8485	10526	4682	6935	8775	12749	10941	4064	12182	2894	1706	35880	8142
HLA-F-AS1	30	49	15	21	4	10	17	14	80	10	58	8	1	3	27	10	40	4
CX3CR1	184	66	165	25	9	10	25	28	5	145	97	213	75	16	15	15	31	67

## Sheet: Normalized expression data
Supplementary Table S3B. Normalized expression data evaluated by Oncomine Immune Response Research Assay
Gene / ID	P17011-001-07	P17011-001-08	P17011-001-101	P17011-001-113	P17011-001-119	P17011-001-12	P17011-001-127	P17011-001-131	P17011-001-132	P17011-001-145	P17011-001-15	P17011-001-16	P17011-001-166	P17011-001-174	P17011-001-19	P17011-001-20	P17011-001-38	P17011-001-51
PTPRCAP	7.17482	5.50796	6.06078	6.38335	4.71821	6.89704	6.96142	6.20739	6.8761	6.00964	5.13799	6.38101	6.18602	5.73119	5.98695	7.20209	5.77012	6.16645
KIR2DL2	2.8861	2.8861	2.8861	2.8861	2.8861	2.8861	2.8861	3.71265	2.8861	3.77747	3.53391	2.8861	2.8861	2.8861	3.47232	2.8861	2.8861	3.40411
CTAG2	6.46265	2.8861	6.16804	3.41133	3.74871	2.8861	2.8861	12.1392	13.8948	5.8708	5.79399	3.40004	5.20202	3.42304	5.29958	10.9496	10.8904	11.3547
FAS	9.71724	11.8461	10.1693	9.31707	9.16195	9.9146	9.40337	11.0739	10.6079	9.89884	12.7445	11.0535	10.3636	8.81293	11.7457	9.95675	10.8178	10.1001
ARG1	3.64888	4.1629	4.27598	2.8861	3.74871	3.36981	3.82503	2.8861	3.90814	7.36597	5.89086	3.40004	4.31263	3.64119	4.38013	5.97995	4.52705	3.9063
BRCA2	8.41539	9.58389	8.41393	9.85668	10.1171	9.56273	9.67501	9.84734	12.1188	10.3533	8.34584	9.79436	11.6728	10.7558	10.0042	14.6728	10.6512	9.94938
CD3G	10.4105	9.82572	9.7156	9.90965	9.36028	10.7609	10.3772	9.98506	10.1617	10.1389	9.55919	9.71031	9.1376	9.6678	10.3828	8.65574	11.3062	9.38342
CD40LG	7.49604	5.20911	6.60841	6.27584	6.33652	6.85567	7.34727	6.10544	5.34028	7.36597	7.29387	6.5375	6.81062	7.01509	5.66776	4.78459	5.83998	6.7769
CDKN2A	10.2901	7.053	8.1712	12.2123	13.9076	12.1306	8.67785	13.4827	13.4182	12.2588	10.5891	6.86687	15.6402	13.6112	6.87075	15.7576	11.6569	12.9147
GUSB	12.4875	11.8331	12.4649	13.5546	13.6929	12.347	12.7867	12.5498	14.2579	14.2287	12.2485	12.1359	14.81	13.0599	13.9225	15.3652	13.2718	11.8513
HMBS	8.96609	9.97046	9.45219	11.0976	12.2747	8.72225	10.1417	11.6463	12.0939	10.615	8.4019	9.09683	11.1232	9.54912	9.29861	13.2571	11.2474	9.83534
ICAM1	12.024	14.2621	13.2975	12.7445	12.1067	11.9278	12.2828	12.9158	12.5895	13.1459	14.2488	12.5113	11.7462	11.734	13.3836	11.3992	10.7783	13.1918
IL2RG	12.3352	11.3039	12.6481	11.7186	10.85	11.7774	12.3698	11.1271	10.8529	11.5925	10.8694	11.3254	10.4928	11.5413	11.1938	10.4982	10.1469	11.6755
ITGB2	14.1944	12.8063	13.1019	13.2398	12.7561	12.7021	12.4889	11.7424	11.8647	12.4577	11.5736	12.6964	12.0494	13.3881	11.5162	12.2629	13.8459	12.0341
LYZ	15.62	14.6823	13.929	15.0489	15.3411	15.8915	15.2819	14.7186	14.7295	14.735	14.6572	14.8631	13.4941	15.118	14.6421	14.0535	14.3921	15.0167
CIITA	11.988	12.4276	11.4977	10.6703	10.6494	11.698	10.5408	11.3963	10.911	10.9633	12.9213	11.4043	10.6922	11.3997	11.3144	10.2586	10.8207	11.0152
MPO	4.66207	5.20911	5.36607	5.32819	6.60382	7.5875	5.099	5.63944	6.81105	4.46026	6.76844	5.3207	7.08584	5.64233	4.64223	2.8861	7.83445	5.88605
NCF1	13.1814	10.7593	11.2509	11.6483	11.6713	11.7411	11.5656	12.0406	11.5261	10.6882	11.8326	11.4416	10.7687	11.5211	10.7596	11.1092	10.6166	11.7198
PTEN	11.121	12.2527	11.4286	11.654	13.4787	10.8652	11.494	12.5191	13.8646	12.5906	11.8299	12.264	12.4098	12.4211	11.3968	15.2768	12.7533	11.7665
RB1	10.2406	10.7343	11.0418	10.8553	10.5869	9.76267	10.8423	11.9769	11.4357	9.96481	10.8291	11.0347	10.7243	12.7803	11.6259	15.2517	11.762	9.81542
CSF2RB	12.0288	11.1253	11.7445	11.0438	10.9427	11.2037	11.513	11.4423	10.7765	10.7432	12.4531	11.1619	10.731	11.0096	11.5748	10.9388	10.7971	11.8112
CYBB	14.5737	13.7064	13.2796	13.403	13.2396	13.015	13.2606	12.8342	12.6265	13.0057	12.449	13.1528	12.5601	13.4665	11.9758	12.6317	12.0985	13.3539
EGR2	11.3982	9.46068	11.03	9.8505	10.5362	9.94562	10.3586	9.99037	12.5513	12.1499	11.6055	11.4022	10.1588	10.7909	9.20186	11.9151	10.2958	9.88909
G6PD	11.683	11.1575	11.1359	14.045	15.2153	10.6813	11.8684	14.7787	13.6208	11.3397	10.6116	12.3333	13.5278	11.1848	11.7596	18.4702	12.2319	13.8336
IL2RA	9.19162	10.9036	10.268	10.5265	10.5624	9.90706	11.0246	10.0009	10.552	8.44966	9.97338	10.2659	9.02273	10.5136	9.92012	10.0333	9.19194	9.57237
KRT5	7.2268	9.97785	5.18736	5.50083	4.71821	8.85628	6.57436	17.521	12.0858	9.92646	10.5633	16.969	10.1809	14.5543	18.2503	19.5263	13.7121	8.41857
NOTCH3	12.3325	13.1304	13.0471	13.2013	13.3595	12.8874	12.2858	13.9936	14.3983	12.2285	11.926	14.5708	13.7592	15.3568	13.1248	16.2553	14.2495	14.1177
PECAM1	7.36308	8.89475	7.00823	7.35797	6.62399	7.7025	6.94246	7.69024	7.52889	8.40488	8.51087	6.47695	8.20336	6.31029	7.4127	8.05249	6.38014	7.39746
TWIST1	7.78637	8.18779	7.68804	7.59857	9.80873	6.82384	6.74853	9.14413	12.6362	5.51193	6.38989	8.60071	5.42284	6.76218	11.9101	7.85185	10.6255	6.83918
C1QB	15.4957	14.1601	13.9282	14.9824	14.8038	13.8659	14.0481	13.0398	13.7524	14.0642	13.2306	14.2545	14.3797	15.0871	12.3862	13.8736	13.7069	13.4918
FCGR1A	12.0878	9.53065	10.8013	11.0261	11.2114	10.8304	10.0792	10.6635	9.93917	10.2234	9.62714	11.0281	10.4987	11.5363	8.89185	10.6561	11.3843	10.3664
FCGR3A	13.5315	12.5514	12.4617	12.7206	13.0414	11.9549	12.1831	11.3714	11.8647	12.9824	11.1219	12.5735	12.7914	12.9221	10.8032	12.1597	13.3407	12.3065
FCGR3B	10.1787	9.61454	10.6264	9.02494	9.12725	8.66971	8.95513	8.06442	8.05527	8.6089	8.64806	9.43989	9.30783	9.46914	8.74141	9.4684	7.88408	10.3291
IL10	7.77247	7.65026	6.62212	6.31259	7.29807	7.28726	6.92324	6.84932	6.47495	6.93215	7.05097	6.33049	6.73267	8.8811	7.08383	7.24962	8.54255	6.88713
IL1A	6.27678	12.0092	5.34923	4.32012	4.54434	7.01441	4.67955	9.75875	5.24177	7.2323	8.91374	7.60475	4.72418	5.78741	11.1954	8.25205	6.90508	11.7248
IL1B	9.56239	13.4404	9.93007	9.43947	10.052	11.223	9.42055	12.0542	9.4039	10.6124	11.6177	10.6172	8.25055	9.86979	11.7268	10.917	9.03493	11.4821
CXCL8	9.68238	13.489	13.3313	10.7228	12.9844	9.96633	12.5207	14.1349	12.8006	11.3527	14.5584	13.2789	10.4389	12.1073	14.3003	11.4071	13.0131	15.2254
IL15	6.73173	7.77094	6.2051	5.46801	5.73435	6.93724	6.34722	6.6834	6.31934	7.10545	7.74558	6.47695	6.43699	6.25213	7.12289	9.50793	7.47277	5.83747
IL2	3.95296	4.05761	4.39081	3.62489	3.93512	3.9486	4.02653	2.8861	4.30413	4.02541	4.76415	3.89853	4.13326	4.06094	4.2774	2.8861	3.97717	3.61484
IL4	3.42857	3.42145	3.82474	2.8861	2.8861	3.36981	3.36174	2.8861	2.8861	3.77747	3.79485	3.40004	2.8861	2.8861	2.8861	2.8861	2.8861	2.8861
CD14	14.2787	13.223	12.9118	13.3031	13.2928	12.8628	13.2007	13.0071	13.0499	12.4574	12.3753	13.4426	12.6877	12.6839	11.6089	12.7713	14.2843	13.0118
TAP1	12.8452	13.321	12.5729	13.8479	13.9368	12.968	12.5872	13.4032	12.5914	12.5241	12.2217	13.4583	13.594	12.5811	14.9156	13.1362	13.4643	12.6822
TNF	8.06825	8.15166	7.47519	6.57668	6.70192	7.52306	6.31794	7.83922	6.29565	7.54194	7.80062	7.44095	6.22471	7.66567	9.89596	6.37509	6.91576	8.61221
IL6	8.76327	8.95288	9.85414	7.70529	10.176	8.0836	9.8601	10.0527	9.33356	10.323	13.8293	9.56977	9.61949	7.3542	10.5289	9.13128	10.6304	11.0037
HGF	9.71361	8.46517	9.85631	9.78881	8.30753	7.93314	8.99466	8.2882	10.5016	10.0266	9.41447	8.85826	10.5239	8.28018	8.51115	10.5129	10.5319	9.31959
CD44	6.08571	9.3827	6.15862	4.8969	6.84608	4.84938	5.02537	12.8221	8.6304	7.33152	9.56642	10.4783	6.75913	6.86877	10.2483	14.0459	8.9075	7.5163
CD4	13.1455	12.0339	12.2331	12.3653	11.892	12.0829	12.2009	11.5773	12.486	12.5468	10.9905	12.2018	12.2303	12.6151	10.9584	12.0535	12.7943	11.6143
IFNG	5.72471	6.93614	5.20634	6.79939	7.23413	6.73533	5.6728	7.27916	6.14452	5.51193	7.14694	5.8918	5.61272	6.01567	6.56446	4.78459	4.39624	6.02244
NOS2	2.8861	5.57343	2.8861	2.8861	2.8861	4.60159	3.70272	7.33605	5.07884	5.1531	7.05921	2.8861	3.91449	5.21487	7.01626	9.44822	2.8861	2.8861
BCL2	10.6439	8.16207	9.65557	8.44909	10.7383	12.0117	10.7678	10.8813	11.7089	9.62138	10.0813	10.0544	12.6446	14.0388	10.2946	13.0742	9.89212	9.14644
FASLG	7.96813	7.35543	7.07933	8.54025	8.53114	8.1618	7.34005	7.68149	7.93871	8.28867	7.08367	7.07462	7.22495	7.18951	7.23408	7.29563	7.06701	7.19371
SELL	7.78637	8.59383	8.97495	8.23322	7.16721	8.30268	8.99006	8.23543	6.53676	7.94053	8.98238	8.02842	8.34924	7.49365	8.54979	9.13128	8.68927	8.83254
TGFB1	12.7287	12.6526	12.2201	13.0196	14.239	11.9204	12.0257	13.1969	13.326	12.503	11.9528	13.1707	12.2184	11.959	13.0392	15.2402	14.0104	12.008
ADORA2A	10.3167	10.8214	9.33604	8.48943	8.51512	9.27107	9.53851	9.00748	9.79585	8.93801	9.46795	8.8612	11.2814	8.21625	8.27209	10.0799	9.2994	10.1729
CA4	8.10198	5.03022	5.12872	12.3594	4.94027	5.36243	5.099	4.79598	6.24704	8.30649	10.2069	4.80757	8.75471	4.06094	4.38013	8.79011	4.24817	5.01632
CD3D	10.8052	10.2606	10.0851	10.2295	9.65885	10.6865	10.3981	10.1961	10.0327	10.183	9.62438	10.2614	9.06028	10.14	10.7699	9.07974	8.42086	9.91524
CD3E	11.0934	9.81091	10.4523	10.5129	10.2585	10.8716	11.0184	10.3652	10.2392	10.646	9.55629	10.035	9.65499	10.2715	10.6088	9.51765	8.27147	10.0925
IGF1R	11.2963	11.0579	11.1898	11.9573	14.5501	12.3482	12.1593	14.4995	15.8922	13.3696	11.8714	13.7987	13.265	14.4018	11.9562	16.415	11.6204	12.372
IL2RB	11.2706	10.399	10.9586	10.7041	10.7757	11.3969	10.8282	11.5578	10.2802	10.5604	10.6852	10.8237	10.7058	10.6814	11.1646	10.6517	9.86494	10.6581
IL7	7.13183	8.65409	6.62892	5.36452	6.86312	6.50012	6.78095	6.94035	6.81105	9.05062	7.80553	8.16346	6.50123	6.53799	8.10046	6.19129	7.51542	7.901
IL12A	5.89094	6.82214	5.34923	5.25244	6.54155	7.19092	6.56195	7.63694	6.41033	8.40488	8.06045	6.47695	7.99741	6.55408	5.25176	8.69052	6.77036	5.81253
ITGAX	12.1519	10.378	10.9143	10.7015	10.2713	10.4025	10.0585	10.1556	10.7421	10.3597	10.1063	10.7824	9.78563	11.2562	9.57396	10.7122	12.852	10.6451
ITGB7	10.1346	9.16445	9.97855	9.61743	10.1312	9.81869	9.90716	9.29208	9.86531	9.38411	9.30117	9.90978	9.44798	9.30634	9.2289	9.14389	9.48938	10.018
POLR2A	12.9665	12.4285	13.3036	14.7117	15.4277	13.4483	13.152	13.3186	15.5461	14.1035	13.0838	12.9865	16.7518	13.9272	13.7559	16.7035	14.1528	13.937
PTGS2	8.48521	11.7091	10.5089	7.73246	13.3659	7.48973	13.0354	11.5301	11.9219	12.6252	13.4088	9.85765	9.48395	8.36426	14.9691	10.1123	11.2019	14.1804
GATA3	8.5998	7.75726	8.13361	8.85937	9.86668	9.1356	8.63434	7.33605	7.90026	10.0063	8.54933	8.12965	7.33431	8.58667	8.72884	7.7565	8.03327	8.21368
TARP	9.27034	6.83527	7.53414	7.73246	7.85173	8.91011	8.29377	7.83922	7.65439	8.20565	9.63954	7.77074	7.48418	7.98789	8.80667	7.85185	6.05045	7.98026
RPS6	15.0026	15.4917	15.8931	16.3932	17.3262	15.347	15.9238	16.1779	17.3097	16.0404	15.6964	15.6824	17.2767	17.1433	15.6169	20.5199	16.4573	15.9841
MAGEA4	3.64888	6.86116	7.77	5.50083	5.24202	3.56703	2.8861	9.47511	2.8861	11.1289	4.22348	9.6756	13.499	3.64119	10.6561	9.41741	11.1883	10.8336
AKT1	11.7296	12.2748	12.235	13.0551	13.0458	11.4593	12.4174	12.2393	13.9737	12.4919	12.8475	12.2374	14.5345	12.4046	11.9129	14.9029	12.9275	11.9975
CD276	10.373	11.3845	10.4932	11.1929	12.41	10.4926	9.94682	11.7781	13.0876	10.8319	9.63542	11.5799	11.8239	11.2864	11.4008	12.9388	12.3973	11.4266
ABCF1	12.1738	12.2047	12.5178	14.603	15.3559	12.8901	12.5458	13.3967	15.3067	13.8027	13.2031	12.234	15.3792	13.3024	13.6984	15.8695	13.9603	13.1648
CD74	16.1035	14.0089	14.5693	14.7934	14.0866	14.5141	14.0167	12.6606	14.089	14.6138	14.1195	14.7478	14.233	14.8019	13.9368	13.7884	12.9821	14.3421
IFIT3	9.35899	11.4755	9.61525	10.0645	10.7858	9.87777	10.578	11.0307	10.295	10.1139	10.9217	10.248	12.8863	10.6171	10.9091	9.99898	10.4446	9.34973
CD79B	10.0055	6.6245	9.231	8.00728	6.3118	9.22529	9.38074	8.83698	7.51876	5.98744	8.65079	8.52472	6.3697	8.37331	7.51402	6.87817	6.42584	9.57054
CD53	8.0102	4.1629	6.91131	5.96474	3.93512	7.78172	7.90185	7.59096	6.11768	3.40614	7.52555	6.50755	4.13326	5.1723	6.14853	4.0326	3.38329	7.37247
GAGE1,GAGE12I,GAGE12F	3.42857	3.42145	6.13958	5.36452	4.08911	2.8861	2.8861	3.4745	3.72623	3.61767	3.53391	2.8861	4.72418	2.8861	2.8861	14.0922	13.6692	15.528
NECTIN2	10.2705	10.8974	11.4926	11.6964	10.7802	10.3818	11.3731	9.86866	12.1846	10.0637	9.31668	9.89979	13.4707	12.6371	10.9754	13.2025	10.3817	13.0736
LCK	5.14784	9.0288	4.19203	6.56153	10.0612	7.54918	5.82777	6.30248	11.6927	2.8861	6.47902	2.8861	8.21292	11.8319	6.97414	4.46978	6.42584	2.8861
TOP2A	11.7729	12.7779	11.5545	14.8152	14.2727	13.7655	13.5818	13.6632	16.0926	14.0994	11.8667	13.3698	16.9854	15.0659	13.1541	17.0899	14.511	13.3219
VCAM1	12.3302	11.0147	12.7624	11.8541	11.7764	11.5729	12.0203	11.6647	11.658	11.6749	12.0117	12.7615	11.7355	11.9665	13.5818	10.4834	12.1075	12.04
ZAP70	9.45778	8.93174	9.24648	8.57065	8.2506	10.052	9.17753	8.63001	8.73891	8.53526	10.9579	8.85826	8.12448	8.52307	9.46196	7.99796	6.99841	9.04219
LILRB2	10.8214	9.82572	9.48146	10.0632	10.5533	9.65719	10.2994	9.23351	8.8759	9.09229	9.79533	9.87815	9.5831	10.3595	9.46449	9.91324	10.628	9.86247
LILRB1	10.1774	8.35146	7.97526	8.71374	9.42171	8.68155	8.92896	8.4096	7.33476	7.83394	8.65079	4.80757	8.77422	9.18062	6.91597	9.02628	8.94433	9.24136
XAGE1B	7.78637	13.6246	5.46294	3.78618	3.50053	6.59135	13.8155	4.56688	4.40852	3.91018	9.83777	4.01257	6.18602	2.8861	3.70963	12.4585	12.0383	4.58951
ENTPD1	11.758	10.8966	11.5968	10.3862	10.5095	10.9323	11.3365	10.3404	11.4181	10.8668	10.7444	11.2761	10.2122	10.6407	11.55	11.3593	11.0461	11.2784
GPR18	6.92065	6.16363	7.23861	6.21886	6.03745	6.56587	6.43159	6.83356	5.84987	6.87339	6.91211	6.95804	5.97485	7.68034	6.3387	4.46978	4.58733	6.85132
GAGE12J	2.8861	2.8861	3.24623	2.8861	2.8861	2.8861	3.36174	2.8861	2.8861	3.40614	3.79485	2.8861	2.8861	2.8861	2.8861	7.58203	12.332	7.69485
GAGE13	2.8861	2.8861	2.8861	2.8861	2.8861	2.8861	2.8861	2.8861	2.8861	2.8861	2.8861	2.8861	2.8861	2.8861	2.8861	5.24579	6.05045	8.28229
GAGE10	2.8861	3.80317	3.24623	2.8861	2.8861	4.21334	3.36174	3.4745	2.8861	3.40614	3.67627	2.8861	3.62081	3.64119	3.70963	2.8861	4.07598	5.47189
HLA-F	9.46643	10.0099	9.48146	10.0059	8.78827	9.21718	9.17145	8.68351	8.94548	9.14769	8.48057	9.64175	8.98974	8.49433	10.8989	9.39649	9.59076	8.52054
JAML	8.60765	8.16207	6.97132	6.77338	6.62399	6.08032	7.31082	6.98378	6.63417	8.30649	7.09975	7.14415	7.16698	7.63589	7.37008	7.58203	6.89433	6.83918
CCR5	10.7055	9.91614	9.84545	9.91262	10.0903	9.97478	9.80885	9.06907	9.50209	10.4616	9.42087	9.71031	9.60867	10.2484	9.6018	8.2979	9.80613	9.26641
LEXM	4.36401	4.82272	4.19203	3.41133	5.12949	4.70676	4.11293	5.81264	3.90814	7.13573	5.50503	5.24788	4.83509	4.34996	4.7897	7.72326	4.1657	6.43305
CCR2	9.20719	9.00007	8.60797	8.38637	7.48542	7.87756	8.97619	7.4435	7.137	8.56146	7.17755	8.51353	8.886	8.20109	6.54536	7.65438	6.80525	9.38133
TFRC	12.7816	13.1306	13.1894	15.7996	14.8252	13.8286	14.0804	15.4463	17.0277	16.255	13.4778	14.7405	18.4205	14.8462	15.4259	19.6491	13.7948	13.8767
EIF2AK2	11.312	12.1748	11.6848	12.6752	12.7479	12.1984	12.3915	12.8533	14.2136	13.2257	12.084	12.2134	14.1327	13.3673	13.043	15.5335	13.1467	12.8187
ALOX15B	9.83886	8.98549	7.94301	8.39914	7.69925	7.81976	8.44584	7.57215	8.67205	7.89413	10.3727	8.10996	7.74389	9.56302	7.17337	8.56491	6.71025	7.5976
CMKLR1	5.94222	4.42708	6.97132	5.43438	7.4521	4.65531	6.63481	5.8763	5.55914	4.22129	5.07136	5.54852	5.03146	5.40954	4.85736	4.46978	2.8861	5.4059
ITGAM	11.5565	11.0558	9.26615	10.297	10.0777	9.88803	10.1622	9.43148	10.2757	10.2558	10.341	10.1622	9.5831	10.7297	7.76477	9.76612	11.5569	9.96754
CD244	7.75843	7.06418	7.21627	7.27717	6.86312	6.29797	6.99861	6.95497	6.51645	8.10232	7.52555	7.44095	6.93178	6.63193	7.49432	7.4662	6.66027	7.2679
VEGFA	11.4901	14.5211	14.0193	11.5222	14.0983	12.1713	13.0389	12.5879	14.9843	13.5837	15.5271	12.3968	14.4092	12.7203	12.5533	14.7892	13.0997	13.8083
ZEB1	9.82715	9.78083	10.1849	10.805	10.0777	9.76823	10.2704	10.2264	11.4504	10.8631	11.2039	9.92393	10.3997	9.18576	10.4685	12.2716	10.685	9.66088
MX1	11.3777	13.0994	10.9596	11.1495	11.2951	12.8776	13.0331	12.6297	10.8265	11.6463	12.3803	11.774	15.3516	12.7581	12.1619	12.4572	12.8389	12.4003
CD19	9.01115	6.76841	8.44303	7.59117	5.18695	9.23536	8.72838	9.15047	7.62639	4.71707	10.5155	8.03887	4.60229	5.89348	7.4127	6.9375	5.3554	8.69506
FCRLA	10.5493	5.47401	7.50864	6.34841	3.93512	9.54987	8.97387	7.30219	5.91396	4.65783	8.01041	7.35146	5.27973	5.1723	5.59407	6.9375	4.80224	8.38984
TNFRSF17	10.5915	7.21216	8.66506	8.26611	6.15366	9.65569	10.1935	8.66146	6.92302	4.46026	7.63977	9.45361	6.95483	6.45467	6.63843	7.82076	5.38732	9.29102
HLA-DQB2	7.27697	6.74076	5.89994	6.69237	5.87722	8.00563	6.25751	4.56688	4.50408	6.44265	6.20787	9.02774	6.26237	6.67668	6.3387	2.8861	5.449	5.37166
PRDM1	12.6267	10.2113	12.1035	10.6817	11.6905	12.2909	12.8194	11.7397	14.8431	12.3174	11.0323	12.3124	10.5046	10.3503	12.0357	12.6714	11.1673	11.8599
PTPN7	10.8889	9.71341	10.3357	10.1221	9.33312	10.6665	10.6497	9.86094	9.70739	9.78911	10.1741	10.0219	8.75471	12.1631	9.29292	9.05326	9.47327	9.98958
CD27	11.7812	7.96196	9.78843	9.16102	7.63144	9.98556	10.6336	8.82513	8.92649	7.69872	8.71206	10.1357	6.97752	8.15462	8.51604	8.32029	6.21621	9.46632
CD40	10.818	11.6813	11.012	13.1863	10.3814	10.1681	10.317	11.0281	14.2668	10.9752	11.5321	11.6475	11.8239	10.7419	11.541	10.2528	10.7856	10.8742
CD68	14.9272	13.8524	13.4985	14.6021	14.5838	13.4183	13.4929	13.6283	14.1585	14.8728	12.986	13.7209	13.7348	14.5973	12.5114	14.1968	15.9402	13.6761
CD70	7.00651	9.63897	6.7017	7.19155	6.8966	6.66515	6.98014	6.61124	7.12369	6.44265	6.66395	6.63763	5.5523	11.5608	7.49432	5.86103	5.18333	6.73818
CCR1	11.6121	10.4056	10.0888	10.2648	10.298	9.51059	10.0106	9.43148	9.8125	10.5752	9.65454	9.98054	10.1187	10.3085	8.79063	10.1187	11.6253	10.4827
CTAG1B	5.50165	2.8861	3.50668	2.8861	2.8861	2.8861	2.8861	2.8861	2.8861	2.8861	4.67404	2.8861	3.62081	2.8861	2.8861	14.7834	12.0383	9.97723
FYB	11.7219	12.7386	11.7054	11.0102	10.9397	11.2093	11.1442	12.7912	10.9734	11.2162	12.3223	11.311	10.4059	11.1299	12.0264	10.8221	11.7265	11.1436
GAGE2C,GAGE2A,GAGE2E	3.81509	3.63898	5.988	5.2129	4.08911	2.8861	2.8861	2.8861	3.90814	3.91018	2.8861	2.8861	4.83509	3.64119	2.8861	10.9096	14.0701	15.5864
CXCR3	5.63349	5.40347	4.70716	4.94702	4.54434	5.20115	4.82056	4.16832	4.59239	5.44738	3.99043	4.95603	4.46656	4.50722	4.38013	2.8861	3.58583	4.9702
CXCL1	7.63321	14.2272	12.3318	7.67059	9.78666	9.00975	10.2144	12.7022	9.26868	10.0022	12.774	12.8647	11.1508	8.9821	13.5383	8.72449	10.6392	11.6593
HIF1A	12.6532	15.1694	14.3062	12.8412	12.4492	13.6102	12.7292	13.906	14.5283	12.6967	13.8234	13.9265	14.9955	14.0487	14.1657	17.1906	14.3025	13.6466
IFIT2	10.2368	10.5788	9.5508	10.2019	10.3089	9.91209	11.1437	10.8823	9.52752	10.1062	10.3611	9.73941	13.3632	10.3549	10.0471	10.729	10.8256	10.014
IFIT1	10.331	11.5049	9.04367	11.9928	9.73458	10.0847	11.8662	11.2782	8.91111	10.7366	10.9926	9.82936	13.6288	10.2034	10.5659	10.5274	11.9356	9.97308
CXCR2	7.70085	7.35543	10.0344	4.73339	6.8966	7.1229	7.24278	8.22944	5.01973	7.74522	7.87244	6.41372	7.69009	6.03888	7.91302	11.2055	6.49888	8.37735
IL10RA	12.2923	11.3496	11.6539	11.6804	11.3896	12.3067	12.0463	11.1574	11.7635	11.1865	12.0005	11.4133	11.137	11.2684	10.9566	10.9059	11.8384	11.1728
TNFRSF9	8.576	11.2743	8.96295	9.16102	9.46682	9.083	8.79312	9.81973	9.36775	8.51625	8.62609	9.01457	7.12698	8.63259	10.1668	8.36406	9.10863	8.7829
IL18	10.5185	11.7166	10.2417	11.0019	9.75063	11.6502	9.9598	12.9165	9.88315	13.8898	11.9868	11.2296	10.4225	11.2666	10.0521	9.92789	10.3884	11.7062
CXCL10	11.0807	13.4684	10.4946	12.2162	12.3428	11.5717	10.9871	12.9697	11.2327	10.8024	11.8749	12.4031	11.8924	12.1271	13.3186	10.8221	9.61706	10.8563
AIF1	11.8522	12.1404	11.2304	11.5906	11.9748	11.3095	11.1885	11.3076	11.577	11.2768	11.6439	11.8677	11.214	11.7836	10.9512	11.5394	12.9358	11.2061
BCL6	11.1801	12.1094	12.4983	10.155	11.1872	11.2174	11.8936	13.1214	14.5894	11.4802	13.2832	12.2864	13.1651	10.9788	12.2558	16.2494	12.3377	12.1008
CEACAM1	8.05682	11.5156	12.1219	7.22066	14.0397	8.77294	9.58038	8.31105	11.0118	12.0261	9.34386	7.81398	10.9091	10.8349	11.7942	9.88349	8.41337	9.71481
CXCR5	7.70085	5.50796	8.22804	6.03269	5.77147	7.36289	7.07893	7.65492	6.17085	5.51193	7.12354	7.08476	5.35318	6.45467	6.95982	5.03553	2.8861	8.05015
CD1C	6.13046	5.63593	6.03005	5.13011	4.79667	4.28819	5.16871	5.77969	4.75164	6.99961	5.50503	5.74383	5.20202	5.12831	5.92868	4.46978	5.53657	5.4393
CD1D	7.57028	6.96029	7.96459	6.71989	7.86021	6.66515	8.47573	6.7521	7.21439	6.09512	6.50349	7.44881	6.50123	6.82972	6.40391	9.59312	7.42136	7.47777
CD2	11.452	10.9043	10.8114	11.2068	10.9596	11.8121	11.6852	10.7631	10.6444	11.5524	10.9529	10.9829	10.3311	11.5593	11.2667	10.1123	9.05672	10.6443
CD22	8.77028	6.98404	8.96696	6.56153	5.657	8.23998	7.44468	8.99343	7.48796	6.72167	10.2398	7.74543	6.90836	7.51016	7.59948	6.5378	7.26346	9.07349
CD33	9.25543	7.96791	7.48269	7.66355	7.64133	7.67312	7.46472	6.94035	7.57846	7.75823	8.12459	8.19182	7.46828	7.99962	6.88598	7.65438	9.32756	7.16486
CD37	12.7978	11.1312	11.5387	11.0779	10.7081	11.9368	11.298	11.4641	11.4689	11.0524	12.2701	11.5972	10.6506	11.3656	10.7534	11.0128	11.759	11.6742
CD38	11.0181	9.97342	10.7125	11.0512	10.0993	11.0816	11.4496	11.6396	9.65066	9.56146	9.27139	10.3842	9.72346	9.7148	9.68441	13.57	8.97007	10.639
CD47	12.6627	14.3177	13.3608	11.5002	13.6889	13.249	12.5999	13.2775	15.0542	13.1102	13.1408	13.6121	13.8065	14.0913	13.6925	14.5767	13.0146	13.5279
CD48	10.533	9.15667	10.1071	9.88567	9.15508	10.2329	9.66495	9.71447	9.66906	8.80335	9.34218	9.99268	8.74156	9.66596	9.72717	9.10574	9.9872	9.94375
CD63	14.6412	14.6769	14.7545	15.2873	15.4731	13.6714	15.5924	14.8949	15.3283	14.9503	13.8656	14.11	16.2029	14.5312	13.9495	16.6106	15.8761	14.5767
CD69	9.06343	8.69411	9.35147	8.36484	8.00498	8.77571	9.25808	8.25323	8.27549	9.76838	10.3628	8.0179	8.84355	8.46502	9.81701	8.20469	7.40633	8.89227
CD79A	13.6663	9.00007	11.9664	10.9187	7.05319	12.6467	12.2797	10.9746	11.1177	6.5368	10.7746	11.8171	8.43344	8.51492	9.3099	9.77425	6.92635	12.0636
CDK1	9.80344	11.9716	10.7169	13.6823	14.0927	10.9745	11.4985	13.0102	14.6548	12.2014	10.1191	12.6285	15.4423	14.2668	11.9317	15.5262	13.4677	11.3981
CD52	13.7301	11.5075	11.9135	12.3157	11.743	11.8131	11.5645	11.6019	11.2678	12.8368	13.1662	11.6564	11.8161	12.2315	11.1915	11.7248	13.6897	11.9697
CEACAM8	3.42857	3.42145	3.88714	2.8861	2.8861	2.8861	2.8861	3.4745	2.8861	3.77747	5.17008	2.8861	2.8861	2.8861	2.8861	4.0326	4.58733	2.8861
CCR7	9.2277	8.43543	10.5554	9.16102	7.64133	9.74726	9.47746	8.83698	8.79444	9.00499	9.38697	9.26414	8.12448	9.12281	8.94716	8.02548	6.42584	10.0367
FOXO1	11.0666	10.9289	11.3471	10.0348	11.0071	10.7679	10.6105	11.6812	13.921	11.4068	11.7925	11.5206	10.8352	10.0638	12.4823	14.6197	10.2313	10.8926
FUT4	7.55411	7.80459	7.30363	7.67059	9.98768	7.46935	7.28097	7.60027	10.5851	9.99258	6.85636	7.42508	9.39438	8.24611	7.48436	9.05326	9.19631	8.89519
GBP1	11.7532	13.2994	12.2629	12.3828	12.8641	12.6829	11.9009	12.826	12.7922	13.3093	12.8629	12.6536	12.4748	12.4363	13.8433	11.3402	11.8408	12.1817
GZMK	10.4183	8.40506	10.3196	10.2672	9.06259	9.77653	9.46261	7.62786	8.73455	10.607	8.90464	9.44774	7.26234	9.13615	9.75016	7.61866	6.51305	8.98846
HLA-A	4.78723	5.96126	15.4442	16.1115	12.1635	4.13272	15.4513	12.303	4.30413	6.35913	13.7618	16.6186	17.4445	5.33501	16.8898	16.5248	16.202	15.6388
HLA-C	14.6419	15.8915	15.3955	14.6814	13.7811	16.2856	15.7395	15.041	14.7231	15.0088	15.169	15.4594	16.4504	13.7189	16.4683	16.6791	15.5131	14.7131
HLA-DMB	6.95808	5.4392	9.74471	9.83649	5.69621	5.36243	5.35833	5.15775	5.84987	5.30827	8.27344	5.81978	5.03146	11.5838	5.29958	5.03553	10.0355	5.14563
HLA-DOA	11.4965	10.3349	10.4528	11.0566	10.4048	10.4595	9.79443	9.5681	9.94673	10.989	9.92584	10.289	10.1339	11.2178	9.40252	9.57462	9.06391	10.328
HLA-DOB	10.5524	9.23272	9.13206	7.9905	6.97704	10.1297	10.0541	8.92104	8.18246	8.20565	9.60905	8.80419	7.40286	7.12657	9.9293	8.18041	8.51133	8.95804
HLA-DPB1	15.3961	14.3823	14.0827	14.1347	14.0248	14.4325	13.5668	13.758	13.8104	14.4626	14.4612	14.3627	14.0162	14.5883	14.2191	13.6742	13.4952	13.6108
HLA-DQA1	13.5804	12.4717	13.3442	12.2655	12.7436	12.9035	13.1582	12.6263	11.6678	13.5848	12.3786	13.9027	12.1095	7.30769	12.9131	12.2844	11.3539	12.6667
HLA-DRB1	17.0812	16.3405	15.692	14.8724	14.2027	14.7073	15.1015	15.3081	14.7823	15.9976	14.9352	16.2447	15.4004	14.7841	16.1357	14.4308	15.6609	15.4695
HLA-G	8.58	7.60513	7.16585	5.13011	4.34021	4.28819	4.02653	4.98948	8.1369	6.5519	5.66808	5.35568	6.14624	3.80583	5.29958	2.8861	8.02838	4.12351
IDO1	9.00225	12.2405	10.6407	9.77093	10.5014	9.82137	9.50025	11.7339	10.5383	9.55588	10.4333	11.326	10.1514	9.38669	13.1504	10.537	8.10012	9.55769
ID2	11.5905	10.7991	12.1695	12.6447	13.6459	12.2307	10.8009	10.3611	14.4759	13.0334	12.0382	10.9404	14.1097	13.0658	11.2918	14.0568	13.4178	9.77316
ID3	10.2304	9.8076	11.8945	13.1628	13.4299	9.06051	9.05089	8.96491	15.3366	9.61067	10.7488	10.8169	11.033	9.60008	10.5659	13.8718	13.8335	11.0523
IFNB1	2.8861	4.34593	3.68328	2.8861	2.8861	3.84055	3.93147	4.04006	4.18863	3.61767	4.52493	3.60918	4.60229	4.26216	4.1638	5.03553	3.73904	3.61484
IL3RA	9.48571	10.1101	9.60499	9.42082	9.70194	8.73082	9.81925	9.33728	9.83711	9.91344	11.4767	8.5505	9.91423	9.32044	10.0301	9.30967	8.97007	9.63314
IL7R	11.3586	12.2188	11.7339	10.953	10.9226	11.4806	12.6172	11.4149	11.8082	11.3305	12.3353	11.4113	11.1754	11.3696	12.1244	12.0668	9.92144	11.8472
IL12B	3.42857	4.87783	4.46129	4.32012	3.50053	4.35819	3.70272	3.4745	3.4843	5.68917	5.07136	4.36984	3.62081	4.06094	3.8882	2.8861	2.8861	4.12351
IL13	3.42857	3.42145	4.3156	2.8861	3.93512	3.84055	3.93147	2.8861	4.18863	5.41392	4.92695	3.76723	2.8861	3.42304	3.8882	2.8861	3.38329	2.8861
IL17A	4.66207	2.8861	3.50668	3.41133	2.8861	4.60159	3.70272	5.67586	2.8861	3.91018	3.99043	5.08912	5.1195	2.8861	4.1638	2.8861	4.58733	3.61484
IRF1	12.2472	12.8559	12.0557	11.9172	12.6747	12.288	11.6623	12.2955	12.7904	12.7141	12.8649	12.7915	12.8377	12.374	12.7282	13.2345	10.9588	12.1333
ISG20	11.7514	10.8587	11.2761	10.1663	11.3984	11.6464	12.0307	11.0545	12.8918	9.39247	11.5097	10.9432	11.7104	9.93231	10.7831	10.1994	11.1949	11.9106
ITGAE	9.10004	9.26206	9.46926	10.3151	11.9146	9.32679	8.42896	9.76082	12.1371	8.95222	9.44303	9.03297	11.8294	10.1531	9.91827	13.2092	10.1638	9.76519
ITGAL	11.7078	10.3746	11.1273	10.9659	10.4754	11.3647	11.038	10.3321	10.4599	10.9314	11.6107	10.6935	10.1809	10.9183	10.2931	9.96387	9.388	10.2852
ITGB1	14.2485	15.5642	14.8799	15.0829	15.7396	14.9231	14.8671	14.7699	15.5062	14.9613	14.9184	14.9753	17.0811	15.6193	14.702	16.763	15.7354	15.7174
KLRB1	9.39116	7.68682	9.36774	7.0144	8.39769	9.42866	9.6151	9.53453	8.53831	9.70768	8.54348	8.7857	8.08335	8.48184	8.82648	8.40653	6.90508	8.94963
KLRD1	8.36997	8.10382	8.01457	8.77049	8.26983	8.65777	8.21324	7.90831	7.9538	8.31532	8.43704	8.12475	7.91776	7.4515	9.19579	11.955	6.87257	8.12679
LAG3	8.74916	9.02596	9.11168	10.455	9.36326	9.57389	9.40337	8.59786	8.47173	7.67832	8.82247	8.40467	8.29625	7.96413	8.85376	8.46798	7.36027	8.31322
LRP1	14.8162	13.54	14.6055	14.4634	14.1717	13.1872	13.923	14.4167	14.9423	15.0371	12.8577	14.7768	14.4326	13.9682	14.2003	16.2091	15.6702	13.8788
LY9	8.41092	5.60503	7.47142	6.70619	5.97554	8.19523	7.76857	7.24391	6.11768	6.21435	7.9717	7.26498	5.77957	6.58573	6.14853	8.38545	5.508	7.2679
SH2D1A	8.48521	8.0318	9.03095	8.51702	8.21798	9.19049	8.82443	7.57215	7.85272	8.50086	8.53466	8.20116	7.70373	7.99962	8.92529	6.99447	5.86251	8.2323
M6PR	12.8258	12.6628	12.6398	13.7903	14.4803	13.5152	12.5832	13.8131	14.2426	13.2626	12.4137	13.398	15.2369	13.3327	12.8356	17.1424	13.6133	12.7431
MAD2L1	9.18639	11.014	9.49449	11.8417	12.7006	10.2637	10.1018	10.4422	13.3758	10.6168	8.92278	11.368	13.3361	11.3881	11.4679	14.2141	12.5728	10.5049
MIF	13.4045	14.7157	13.7297	15.2204	16.8771	14.1373	13.7224	15.3874	16.4392	13.7447	13.2453	14.4354	15.6163	14.5045	14.1072	18.7	15.6363	14.9953
CXCL9	12.6742	12.9701	12.4342	14.4217	15.2917	13.3757	12.2471	13.2291	13.3873	12.3269	12.7153	13.277	11.1104	13.8041	13.3237	11.3913	10.5197	12.242
MKI67	10.3298	12.7056	12.7665	12.6666	14.546	12.0378	12.9113	13.486	15.7492	13.6947	11.1515	13.7962	15.5802	14.0429	13.6358	16.3002	13.4044	11.846
MRC1	13.269	13.7184	11.3491	11.7715	11.9212	10.7033	12.318	10.4292	11.2851	13.2546	12.545	11.1391	12.6062	12.6208	10.6293	10.2054	12.067	11.0192
IRF4	12.5415	9.10093	10.1676	9.65515	7.53929	10.896	12.1194	10.5214	8.55819	7.39127	9.8544	11.3286	7.99741	7.81267	9.07848	8.67324	6.79371	11.1661
MYC	11.5499	12.6835	12.0873	11.7736	16.0843	11.0276	12.9697	14.4274	16.1445	11.5956	13.2818	13.7909	10.1834	14.693	13.3381	18.0368	14.0129	13.1015
NT5E	9.03462	14.3973	9.21535	8.59304	8.79271	8.54561	9.27517	8.08445	8.95301	9.51625	10.6785	8.71583	8.37502	8.89687	8.43579	8.27516	10.648	8.85373
PGF	9.41594	9.72399	9.77933	10.8452	9.44162	9.16963	9.3398	11.8574	11.4511	9.74734	8.37908	12.5552	11.7852	10.4262	10.5143	10.584	12.1222	9.58509
SRGN	13.5642	13.7074	14.1023	13.7412	13.7224	13.5456	13.8821	13.1161	13.3134	13.0154	14.2668	13.073	13.0435	13.1306	13.6854	13.6058	14.417	13.8079
MAPK1	11.5776	12.3094	13.0344	12.8958	13.9499	11.3578	11.5683	12.6848	14.6109	12.716	11.3539	12.4618	14.0426	12.1539	12.6545	16.5629	13.0576	12.6456
PSMB9	11.779	12.3955	11.2919	12.4338	11.4624	12.2882	11.5154	11.8156	11.1879	11.7565	12.2713	12.5746	12.9452	11.1667	13.7924	11.9442	11.9998	11.4427
PTK7	11.8666	12.4203	13.3256	13.9014	15.1553	13.548	11.9864	13.5454	16.0204	12.6476	11.8576	12.9764	15.3595	14.8802	13.8383	15.1003	13.4172	11.7949
PTPN11	12.0096	13.0206	12.4917	13.763	14.408	11.8747	12.7662	13.3715	15.6108	12.9482	12.6303	12.9245	15.4185	13.5686	13.3585	16.1531	14.1532	12.8003
PTPRC	10.8555	7.75726	10.3486	9.0575	6.96131	10.0267	10.1354	9.72938	8.79024	8.81273	11.3328	9.19113	9.00082	8.25593	8.76212	9.13128	8.80823	10.4552
PYGL	10.7398	11.9	10.5167	12.7785	11.9487	10.0057	11.8593	12.1707	15.0551	11.3468	11.5508	11.9678	12.9693	10.3121	10.2006	15.1241	12.9617	13.649
S100A8	10.0891	13.2253	11.4042	9.6409	9.84335	11.2164	10.2637	15.2754	9.19759	14.1439	12.4837	10.807	10.1711	9.49007	12.9917	12.7058	10.834	15.8504
S100A9	11.988	16.0021	14.1199	11.2141	11.4652	12.5515	11.5962	17.4002	11.2046	16.6256	13.8487	12.2317	11.7172	11.1458	13.5768	13.7457	12.9053	17.5559
CCL2	11.8444	11.1568	10.9377	10.7237	12.2098	10.668	10.8813	11.3598	9.79166	12.3836	14.1895	11.6509	10.9961	11.7225	11.4717	10.4278	13.7235	10.6632
CCL3	10.617	10.4133	8.65515	10.2496	10.5624	9.16119	9.45929	10.6344	9.52752	10.1151	11.481	8.82847	8.55871	11.4003	9.49944	8.85288	10.2897	10.0642
CCL4	11.0962	10.8181	10.3091	11.3424	11.4484	10.0814	10.9934	11.4806	10.4652	10.8001	10.4646	10.1941	9.40693	11.4129	10.5647	10.4071	9.48582	10.7997
CCL5	11.7585	10.7619	10.9257	11.9327	11.5612	11.2416	10.9016	10.2279	11.1042	10.9075	10.7621	10.5002	10.5258	11.1117	10.9147	10.5177	9.33352	10.8852
CCL17	5.6017	8.0089	5.06735	4.67374	2.8861	5.30022	5.98607	7.89324	6.29565	6.81212	7.16233	4.36984	5.72615	4.70946	5.43366	7.15294	3.86643	5.81253
CCL18	13.6546	13.1159	11.9159	11.9494	12.1889	11.1694	13.292	12.9709	11.7952	11.8137	11.6545	13.0553	14.2766	13.1844	10.0605	12.7217	12.1985	13.358
CCL21	10.9542	9.27411	11.3733	9.09458	11.0559	9.77239	10.6438	10.3665	9.36775	10.3208	9.48636	11.6484	10.9411	10.1766	9.86948	7.91209	9.90152	8.97195
CCL22	8.18826	9.36479	8.09501	7.87337	6.9454	8.20758	9.06407	8.89482	8.43993	8.81273	8.05635	8.372	8.65303	7.84557	9.45179	8.70761	3.86643	10.9846
CX3CL1	9.38889	11.9698	8.893	9.16849	9.69722	10.3385	9.85253	11.1691	10.3112	11.0265	12.1151	12.1298	9.994	8.95525	11.9295	10.4071	9.05672	8.74127
SNAI2	9.98605	9.93448	9.93417	7.88552	10.6009	9.45304	9.00608	12.4352	11.8953	8.61962	9.18948	12.7758	10.1414	9.58069	11.9781	14.4619	13.2415	9.68641
SSX2	6.46265	3.63898	2.8861	2.8861	2.8861	2.8861	2.8861	2.8861	2.8861	2.8861	2.8861	2.8861	6.06315	2.8861	2.8861	2.8861	3.38329	2.8861
STAT4	7.19584	7.89483	6.83112	7.51496	6.92932	7.98665	7.94049	7.64596	6.8761	7.30513	8.80302	6.65138	8.17428	6.80309	7.55263	6.61268	6.16309	8.38984
STAT5A	11.0063	10.6313	10.5112	9.92296	10.3902	10.7981	9.62551	10.0493	10.7954	10.5027	10.7994	10.5494	12.1915	10.9766	10.69	10.2352	10.6858	10.4008
STAT6	12.1269	12.7161	12.6915	12.8439	10.6986	12.1102	12.171	13.1222	13.4413	13.1076	12.5567	12.9808	14.5727	12.8075	12.8801	16.3199	12.6739	12.8467
TBP	9.49632	9.72223	9.63303	10.2176	11.1897	10.6181	9.63142	9.85513	12.8661	10.5971	10.2852	9.87815	12.0927	11.2726	9.84833	13.5316	10.2722	9.95359
TCF7	9.33083	7.81783	9.17777	9.82708	10.9526	9.38768	8.66637	9.44445	12.096	9.08457	9.40805	8.63553	10.3179	8.55522	9.97082	8.80606	9.2414	10.3463
TLR3	8.40192	8.37851	7.73903	6.94625	7.60137	7.69667	7.3328	7.5142	8.34582	9.01856	7.79077	9.23719	9.56082	8.49433	9.08507	10.0333	8.25061	9.30208
TNFSF4	8.04531	6.84827	8.55565	6.8747	8.4035	7.95771	9.40337	7.4121	8.50796	8.70269	6.4415	7.70005	7.24377	8.48602	7.28086	8.82184	5.83998	6.82694
TNFRSF4	8.11856	8.06549	8.70724	8.1551	8.02775	8.23597	8.95748	8.16192	8.17604	7.86435	7.4772	8.06977	7.85805	8.63259	7.57155	8.32029	7.86773	8.19482
CXCR4	12.9854	11.9383	14.1366	12.4891	12.5746	14.6875	13.414	12.3897	15.0573	13.9382	13.9913	12.9361	15.4973	14.6965	13.1476	14.0493	13.4762	13.3014
IFITM1	14.1493	14.8163	16.5483	14.7067	14.1599	14.6738	15.604	14.3658	14.4701	13.0941	14.5991	15.0222	14.6157	13.9601	14.7077	14.9183	14.5057	14.1142
TP63	6.35407	8.15687	5.78143	5.2129	2.8861	5.75592	4.98694	5.10403	4.75164	7.52681	6.71715	7.51023	4.72418	4.5785	7.82118	4.46978	2.8861	4.87269
TNFSF14	4.17901	6.89914	6.80135	4.79029	3.74871	4.42404	4.33532	5.84483	5.24177	4.12812	8.10087	4.29125	5.20202	4.43131	4.92158	4.78459	4.1657	5.9559
TNFSF10	11.6382	13.4194	13.2961	11.0792	11.026	13.1508	11.9225	12.7419	15.1001	12.86	13.4204	15.0361	14.0762	11.7136	14.5669	17.3429	11.5006	11.4185
TNFSF9	5.9917	7.58977	6.05061	7.42617	7.54982	5.3925	4.98694	8.07113	8.40741	5.37961	6.16232	6.24208	5.77957	8.39123	7.09697	8.62009	6.16309	8.50913
TNFRSF14	11.6368	11.4261	11.384	10.8217	11.5264	11.1066	10.7047	11.0638	11.7613	11.1859	11.2607	11.5772	11.3195	11.0789	10.6043	10.4483	11.2735	10.4202
NRP1	12.6375	14.161	12.7133	12.2559	13.4136	11.4751	13.7602	11.8985	13.1287	12.8738	12.4433	12.8485	13.228	12.2429	12.3539	12.4045	14.2838	12.7354
SKAP2	11.6053	12.4311	12.1313	11.9076	12.6878	11.8581	11.2019	11.6316	13.3057	13.4138	12.1884	11.7945	13.852	11.5721	12.1051	14.8263	12.3527	11.5402
FCGR2B	9.88155	7.64284	8.31456	7.92726	7.22099	8.58712	8.80101	7.60027	8.46121	7.28727	7.58379	8.31727	6.3697	7.03809	6.82404	6.5378	6.89433	8.49379
CTSS	14.4581	13.5468	13.3307	13.3098	13.2426	13.4159	13.6022	12.8108	13.0128	13.5394	12.9935	13.2831	14.1925	13.7634	12.8548	13.4766	14.2499	13.6797
FCER1G	14.3345	13.4445	13.1666	13.4974	13.7801	13.2385	12.9634	12.9896	13.4861	13.028	12.8199	13.2829	12.8128	13.7699	12.2674	13.1259	14.5668	13.2555
GZMB	10.2215	10.6728	9.09955	10.8676	10.7891	10.8729	10.4692	10.1729	9.85128	9.49699	9.31153	9.86501	9.10717	9.53105	11.1685	9.84542	7.9477	9.94798
SDHA	11.9045	12.362	11.764	12.8369	14.41	12.4044	12.2881	13.125	15.2668	13.6621	12.0772	12.5239	16.0617	14.0646	12.1677	15.4808	12.7202	13.6909
TNFRSF18	8.00427	8.53094	7.43321	7.77881	8.75682	8.35909	8.28629	10.0045	11.5431	7.17514	7.02593	10.8646	11.9407	8.99094	11.0606	12.4958	7.55002	7.66087
CD83	10.9231	9.76555	10.1664	10.9766	9.66128	10.4994	9.59255	10.0961	11.8446	11.8865	10.5912	9.80816	12.3846	11.0009	10.0215	11.8241	11.0695	9.53351
CD163	13.2238	13.1992	12.6511	12.9505	12.5746	11.6186	12.8228	11.6603	11.6195	12.1422	10.7746	12.3422	13.4285	12.4939	10.3462	11.7723	15.563	12.3918
BST2	12.9854	13.9745	13.2399	13.4698	12.8549	12.7381	14.4118	12.8349	12.8249	12.0821	12.9099	14.2192	13.6189	13.1795	14.323	12.3498	13.755	12.3291
BUB1	9.91986	11.0404	10.0609	12.6726	12.956	11.6648	11.2324	11.6954	13.9352	12.2002	10.0383	12.203	14.3649	12.7662	11.4786	14.7909	12.7223	11.8339
CCR6	7.60209	7.45209	8.22804	5.96474	6.43131	7.63704	7.63353	7.70757	6.61521	8.29761	7.48333	8.39657	7.82099	7.13725	7.46425	7.24962	5.97001	8.21835
EGR3	8.8452	8.14116	10.4618	7.54593	9.65399	7.62482	8.95277	9.89912	10.2636	10.7938	9.75793	8.68291	8.886	8.40894	9.61324	10.5274	9.48403	8.79234
MMP2	15.0566	13.5245	14.8927	12.4566	14.8821	14.2708	14.8241	16.2029	15.2597	14.1509	13.2202	15.8546	14.1221	13.0216	15.3451	14.4835	14.9554	15.2116
CCL20	6.74609	15.442	11.3903	7.43447	10.0202	8.9301	10.1417	12.146	11.0009	12.2522	12.2943	11.335	7.4522	9.19344	12.9422	9.73314	9.11787	17.4054
CCNB2	9.07762	11.2826	9.72353	12.9525	13.3873	12.2289	11.1234	12.4692	14.376	12.8467	10.4807	11.7129	14.1527	13.0965	12.0182	15.2645	12.9322	11.6359
GRAP2	9.64666	8.67242	8.95355	8.56689	9.50516	9.31544	8.83472	9.00047	10.9539	9.49699	10.7734	8.81638	9.39438	9.99663	9.05517	8.62009	7.98355	8.7892
NCR1	5.2349	5.29025	5.74382	5.89332	5.29492	5.66149	5.26687	5.30701	5.07884	5.8708	5.98146	5.00192	4.46656	4.16649	6.50636	5.24579	4.94214	5.26341
MTOR	10.6372	11.0998	11.2812	13.0842	13.2697	11.6182	11.0246	11.5289	13.7466	12.1619	10.8482	11.1583	14.448	12.3791	11.8231	14.2469	11.789	12.252
MAGEA1	8.50215	2.8861	7.13759	4.67374	2.8861	3.84055	6.82307	4.04006	9.95987	8.07138	4.62636	3.89853	3.62081	3.42304	4.2774	11.9639	12.0997	6.18587
MMP9	13.475	13.749	12.5307	13.7743	12.2663	12.2221	12.5914	13.3326	14.0051	12.9132	11.4426	12.0942	12.2167	11.7366	10.8102	11.2025	17.6881	12.4563
PDCD1	7.42666	6.91158	6.84285	7.50711	7.53929	7.98665	7.67424	7.55309	9.1394	6.79954	7.27277	7.2197	5.97485	6.90677	6.87075	6.45877	5.3227	7.02202
PIK3CD	10.4741	10.1835	10.4385	9.83493	10.4616	10.1416	9.61361	11.1589	9.37617	9.67378	10.3965	9.8694	9.28988	10.068	9.42607	10.8646	9.95276	10.0353
PRF1	9.11938	8.47356	9.35657	9.68324	9.62443	8.82725	9.03759	8.76849	8.8111	8.51625	9.20067	8.67289	8.10406	8.3275	9.45942	9.21728	7.47997	8.79234
RORC	8.46807	10.037	10.4351	6.51511	6.38471	9.64213	11.0375	6.88031	9.50465	12.3247	9.65725	5.86821	12.1266	9.63434	6.3825	6.9375	6.81669	12.3308
TNFSF18	7.48755	5.16661	6.28512	6.11848	6.26102	7.03307	7.28849	7.80742	6.93832	9.14521	5.1051	5.3207	7.14712	7.94604	6.0429	11.917	5.38732	4.524
ISG15	10.6072	12.5158	10.5317	13.9601	13.2273	12.1271	13.2072	12.1715	12.5532	10.4596	11.3024	11.2318	14.984	12.0077	11.4133	11.343	13.6844	11.9321
CD80	9.02293	10.5414	8.4621	9.02219	8.5833	9.22124	8.80625	8.98635	8.68115	8.96349	10.8671	8.31297	9.08652	9.19599	9.3239	8.27516	9.56058	8.0606
CDKN3	8.11856	10.619	9.78843	11.6062	12.3999	9.40742	12.1887	11.7169	11.4975	11.8502	8.71466	10.8484	13.9508	11.7176	10.404	14.0597	12.2779	10.5822
CSF1R	12.5451	11.7977	11.9563	11.7683	12.345	11.0345	12.0136	11.3196	11.5007	11.4949	10.6638	12.1325	11.7305	11.5533	10.9202	11.3647	13.1086	11.5223
CTLA4	8.71687	8.89787	8.63344	8.72392	8.47151	9.34552	9.46427	8.32234	14.2505	7.48042	8.18222	8.42472	7.61988	8.37781	9.58795	7.50585	8.42459	8.03432
EFNA4	7.18537	9.07637	7.8591	10.5601	9.96624	9.93205	7.8571	9.86866	11.3754	8.02369	8.26635	8.80724	9.61949	10.5095	10.2903	11.6137	8.80823	10.6118
EGFR	10.3451	12.3682	11.0938	7.06881	8.49348	10.8652	11.1493	14.1429	12.514	13.8535	12.0159	14.2557	13.7445	10.6967	14.4118	15.7208	11.2827	11.9828
MAGEA3	8.07958	7.88228	6.75239	11.1177	4.22216	6.66515	5.94814	10.5165	12.3097	10.9385	6.13111	5.13063	12.3115	3.64119	9.41303	11.7374	10.6133	10.2086
MAGEA12	6.73173	7.053	6.26772	6.33062	2.8861	4.42404	3.82503	7.38	3.72623	9.03468	4.2907	4.90844	10.8779	3.42304	8.88052	4.0326	9.41449	8.30445
CXCL11	8.11305	12.8375	7.66845	9.83649	9.65642	10.4723	9.19759	10.9647	9.12614	8.42948	10.2398	9.31228	9.22994	11.9336	12.427	8.27516	8.03327	8.21368
EOMES	8.25974	6.83527	8.0778	8.31183	7.87704	8.1405	7.3616	7.02594	8.58267	8.40488	6.79835	7.51023	6.67823	7.81931	7.58092	7.99796	7.44362	6.86336
CCR4	6.8021	6.60928	7.84754	6.91093	5.87722	6.89704	7.85204	7.40148	6.70757	7.5937	7.48944	6.27811	5.6706	7.02664	7.87546	6.5378	4.69949	6.65746
MLANA	3.42857	2.8861	2.8861	3.41133	2.8861	2.8861	2.8861	2.8861	2.8861	2.8861	2.8861	2.8861	2.8861	2.8861	2.8861	2.8861	2.8861	2.8861
HLA-B	5.69497	11.9007	11.8668	7.52276	6.7577	15.1321	14.8086	14.3339	7.4134	7.66456	12.7944	11.2996	13.0789	14.8412	13.4561	11.6473	15.1076	11.4709
HLA-E	15.7524	14.8836	15.4449	15.4877	15.6622	15.4754	15.014	15.7527	15.0398	16.3745	16.2087	15.5979	15.4611	15.1045	16.4201	16.3909	15.4901	14.9565
IFI27	11.8658	13.64	12.0769	11.0505	10.87	12.6979	12.8552	11.7975	13.053	10.6213	12.9008	13.2603	15.3049	13.9174	12.2363	10.7248	12.2388	10.256
IFI35	10.8129	11.6288	10.6213	12.4716	11.3206	11.1044	11.5446	12.0065	10.5421	12.2798	10.8665	10.9734	12.4497	10.6028	10.5881	12.8788	11.8912	11.3176
IRS1	9.12759	10.6591	9.63891	11.6791	11.1375	8.90759	11.6731	12.6325	13.0079	12.2174	9.04376	11.3163	9.66547	9.35964	10.7647	13.449	10.317	10.1885
ITK	9.35433	9.09551	9.91146	9.48805	8.49348	10.415	9.827	9.36756	8.88774	9.589	11.45	8.75436	8.42524	8.99388	9.80308	8.15572	7.27178	9.07349
KRT7	11.3041	14.6974	12.7548	7.24919	13.8361	13.0501	13.7229	10.8524	12.2318	13.5209	14.2599	9.06908	14.4248	15.159	11.7529	10.6866	9.08762	15.6121
LAMP1	12.4539	11.8871	12.5134	12.0656	13.5788	11.7143	12.0296	17.6445	14.682	13.2965	11.4363	12.8979	13.5843	12.9846	13.1529	14.9024	12.8816	12.4651
LCN2	8.17247	13.6914	16.4519	9.44358	5.91077	12.6172	13.1819	15.311	9.79166	14.7116	11.8317	12.1881	10.8643	11.4195	15.407	14.1716	10.3389	15.0958
NKG7	10.5984	9.66848	10.3598	10.9023	10.6172	10.2157	9.78253	10.3787	9.90659	10.0689	9.84015	9.76793	9.4317	9.58654	10.3961	9.79037	8.92866	9.98273
TDO2	8.35607	11.0097	8.90976	7.62056	5.87722	10.594	8.22502	11.2796	8.89166	8.02907	9.68541	9.77887	8.82497	9.25834	9.20186	9.11857	8.85872	9.87584
EBI3	6.70259	7.39134	6.85449	10.8098	6.64387	7.05149	6.78095	6.92557	6.95346	7.9519	6.16232	7.51772	6.50123	6.6013	6.0967	7.61866	5.64527	7.47777
KLRG1	8.27461	8.38297	7.93757	9.19312	8.98718	9.26911	8.34506	8.11724	8.6115	9.24326	8.991	7.90819	7.96382	9.32511	8.44607	9.83768	8.2756	7.56122
IGSF6	12.1532	10.8659	10.4014	10.8888	10.0777	10.668	10.231	10.0944	9.82075	10.8877	10.2782	10.696	10.0296	11.6903	9.23484	10.2872	9.54353	9.92671
SNAI1	8.73131	9.83062	9.90171	11.9403	11.9621	8.08805	7.98276	8.03726	12.9717	9.62671	9.24099	8.96888	11.7772	10.0384	9.81105	10.0994	11.437	9.64534
IKZF1	11.9176	10.5827	11.261	10.5919	10.6432	11.5079	11.5637	10.9338	10.8203	11.6332	11.733	10.9611	10.6294	10.663	11.2939	11.3887	10.31	10.9569
IRF9	11.3782	11.9319	11.146	11.0505	11.2951	11.9103	11.9213	12.4232	11.743	12.2508	11.6717	11.8852	13.4192	12.3479	11.2233	12.1782	11.7689	11.5615
HLA-DMA	13.398	12.4933	12.0676	11.8206	11.7355	11.999	11.3279	11.5631	11.8056	11.7666	12.5968	12.1368	11.8177	12.016	12.0656	11.5863	12.7991	11.5911
CD28	9.56239	8.16725	9.13444	8.62236	8.10831	9.02842	8.84494	8.13655	8.083	8.99404	8.14018	8.70275	8.45777	8.43076	8.26048	8.22856	9.2414	8.35629
GZMA	10.8171	10.1221	10.0477	10.9723	10.5933	10.2329	10.1704	9.88397	9.70739	10.7618	9.29596	10.2558	8.81872	9.73072	10.3707	10.1751	8.42831	9.47024
NTN3	4.07254	3.42145	4.65026	9.7495	7.03828	5.96729	4.19243	6.30248	7.94628	5.51193	4.2907	4.80757	7.38602	5.73119	4.7897	5.03553	4.24817	3.9063
OAS3	10.6111	12.358	10.9257	11.3319	11.7222	10.6872	12.3622	12.7164	14.3015	12.0759	10.5065	11.5294	13.8628	11.673	12.4114	12.8004	12.8594	12.3588
PIK3CA	10.6363	10.6313	10.972	10.8058	11.569	11.0426	10.799	11.7549	13.5229	11.8683	10.8636	13.0101	14.1106	13.4272	11.9078	16.2946	11.3277	11.5458
POU2AF1	12.935	9.30966	11.6186	10.6103	7.9101	12.733	12.8643	12.8591	10.3445	6.73495	10.4045	11.806	9.26252	9.17546	9.42087	10.4685	7.20382	11.7973
BATF	9.56642	11.034	10.7425	9.28993	9.61944	10.4185	10.3105	9.91412	9.5892	8.44565	11.3775	10.3479	8.5284	9.62301	10.0077	8.97076	10.5336	10.1227
CXCL13	10.3684	10.7238	10.9902	11.0329	9.61695	12.4803	12.7703	12.7297	10.966	9.27074	13.2064	11.4881	9.92299	10.8887	17.165	10.4685	11.4594	12.4446
GNLY	10.2177	9.6464	9.38183	11.0444	11.3867	10.7413	10.8676	10.6579	10.3937	9.92646	10.8712	9.6756	9.20621	10.3617	11.6361	10.2234	9.52629	9.40818
IFITM2	12.6313	12.7356	14.2236	11.6062	13.1365	11.5207	13.7206	12.2677	13.2549	11.6019	13.5324	12.6915	12.9162	11.8607	12.6052	12.8618	13.7771	13.4603
PVR	10.5816	12.751	11.6286	12.1286	13.2615	9.88803	11.8514	11.0401	13.3714	12.7997	11.7773	11.5047	13.7996	11.7261	11.4463	14.3046	11.4975	13.8291
CXCR6	9.38889	8.02611	8.75752	8.69316	8.97161	8.78122	8.44584	7.91578	7.88458	8.77804	7.82013	8.07992	7.20588	8.79958	8.41501	7.54445	5.592	7.88931
CD226	8.44197	8.65409	8.37218	9.04131	8.81904	9.31544	8.67212	8.60712	8.6583	8.97189	8.76581	8.24693	8.70138	9.17028	8.51604	10.0467	8.83089	8.57988
TNFSF13B	10.7009	10.7823	10.542	10.8767	11.5735	10.987	10.8657	10.0097	10.2392	10.4586	10.3061	10.9788	10.78	10.8728	9.53838	10.3754	10.7964	10.4181
CD6	9.59827	7.57424	9.20633	8.34299	8.04274	9.27693	9.1956	8.46158	9.05447	9.16243	9.90432	8.8103	8.98417	9.30161	8.52577	9.37527	7.12331	9.40818
LAPTM5	15.1647	13.8914	14.5033	14.3363	14.2964	13.9006	13.5252	12.9277	13.75	14.0695	13.4297	14.1417	13.9631	14.5	13.0806	13.5412	15.6169	14.0019
IFI44L	8.68756	13.2086	8.88736	9.54848	10.4019	11.1	11.0634	10.154	8.74326	8.51242	11.2323	9.38774	12.3031	10.0068	9.95291	9.10574	11.4621	9.43654
PMEL	8.00427	6.74076	6.04036	9.61561	7.08256	7.85681	6.49826	8.80112	8.0692	10.0306	6.46662	6.65138	9.56456	10.5999	7.30369	9.92058	6.60848	6.76411
CD160	5.63349	4.57395	5.1681	5.29085	3.74871	4.35819	4.57564	4.98948	3.90814	5.02348	3.67627	5.04625	5.61272	3.42304	3.47232	5.03553	3.86643	4.02114
CORO1A	12.3042	11.5064	12.0858	12.1735	11.5137	11.4759	12.307	11.4293	11.4127	11.6485	10.6018	11.6998	13.3492	11.5687	11.5864	11.0163	11.5147	11.9783
LST1	10.2853	9.40917	9.28555	9.25993	8.3801	8.65477	8.00572	8.25323	8.72578	9.29548	9.40805	9.36302	8.93303	9.15463	8.40976	8.97076	8.48299	7.85967
BRCA1	8.37458	10.2	8.97097	11.5634	11.2139	9.72741	9.92171	10.5731	12.9378	10.1302	9.03961	10.504	12.8477	11.1842	10.1307	15.1415	11	10.2875
STAT1	13.7257	14.3984	13.4151	14.9989	15.9286	14.9085	14.3077	14.6745	14.6809	14.4945	13.6536	14.3123	15.9138	14.7234	14.7523	15.1081	14.1639	14.3341
DMBT1	12.0339	10.6275	13.4564	6.59166	5.77147	4.80363	7.31082	8.3167	6.17085	10.6398	12.3378	9.66721	11.3106	7.24982	6.0429	6.08958	6.089	12.4488
KLRK1	9.3957	9.47953	9.06753	9.51761	8.67267	9.79708	8.70053	9.21244	9.04041	9.09486	11.2455	8.82545	9.06556	8.73438	9.87139	8.34234	8.12326	8.68496
ICOS	7.94353	8.2428	8.18045	7.73917	6.8966	8.5713	8.03726	7.70757	7.33476	8.23386	8.1363	7.31749	6.33482	8.05128	8.58743	6.28617	6.06986	7.18416
TRIM29	4.84539	7.5022	3.50668	5.08669	10.7163	6.47294	5.52457	16.7134	15.9513	9.14026	9.60204	14.1237	10.7864	12.194	15.9012	17.8968	12.1011	7.76689
IKZF3	9.6712	8.63926	10.0509	9.02219	8.12248	9.68098	10.4298	9.86094	8.40741	9.46365	9.78173	9.16991	10.9877	9.0315	8.90308	9.51765	6.38014	10.2015
TBX21	8.40642	6.75465	7.71376	8.74739	7.62149	8.11451	7.57943	6.99797	7.34626	7.5791	8.99743	7.35146	7.77005	7.3542	7.18572	7.3402	5.3227	7.5464
FOXP3	9.32132	9.12774	9.42815	9.20286	8.33822	9.60841	9.74621	9.05561	9.25047	8.55029	7.33517	9.52033	8.24124	9.23124	9.77483	8.75768	5.67116	8.63338
CD274	8.55586	12.246	8.8239	8.69316	9.25491	8.6933	8.80101	9.09562	8.86796	8.81585	10.9562	8.18714	9.49575	9.19599	8.69907	11.8261	8.26316	9.55399
KIR2DL1	2.8861	2.8861	3.24623	4.32012	3.74871	2.8861	6.68139	2.8861	4.59239	2.8861	2.8861	3.40004	4.31263	2.8861	2.8861	4.78459	3.58583	2.8861
DDX58	10.0536	11.8064	10.3501	10.5362	9.83262	10.6425	11.2863	10.4435	10.073	11.013	11.0334	9.97919	13.2103	12.5201	11.0838	11.7824	11.0315	10.4413
TNFAIP8	9.91354	11.3928	9.25088	9.72775	9.29611	9.57071	10.0128	9.95456	9.57219	9.311	11.1389	9.53146	9.47604	10.2311	9.98498	9.51765	10.6671	10.1152
LAMP3	12.0389	10.1873	12.293	8.63321	7.50721	8.88473	10.9963	10.9475	10.2049	11.7794	12.086	12.8813	13.7665	10.767	11.2696	17.0275	8.10478	11.3197
SIT1	9.48571	7.34631	8.23249	8.21408	8.12248	8.46567	8.80364	7.97423	8.31109	8.07138	7.4524	8.09001	7.54608	8.7096	7.32616	7.15294	6.6216	8.53934
KIAA0101	8.32308	11.261	9.92664	13.1642	12.7173	10.5671	10.8448	12.1432	13.3593	12.8759	9.36889	11.4819	12.8338	12.8429	11.683	14.6393	12.4905	11.2632
MELK	7.94353	11.0382	9.44262	10.9609	11.4193	9.64213	9.07061	10.6434	12.2271	10.7618	8.58395	10.2846	13.8625	11.4545	10.1433	14.6055	11.5264	6.41675
ICOSLG	9.09447	9.71164	9.04493	8.6511	9.2191	9.06051	8.40153	10.4741	11.4195	9.50858	9.38042	9.01985	10.2865	9.52903	10.0672	10.556	9.60725	8.33922
SAMHD1	12.7716	12.5504	12.453	12.1729	11.8074	12.0513	11.3784	11.3019	11.8025	11.7842	12.2156	12.5467	12.9732	11.9795	11.7425	13.7794	12.5816	12.0794
KIR2DL3	4.84539	3.93941	3.68328	4.8969	5.24202	4.04508	4.33532	4.47965	4.50408	4.52986	4.41387	4.44325	4.60229	4.16649	5.34577	4.0326	3.58583	4.02114
C1QA	14.3103	13.218	12.7698	13.6502	13.5527	12.9339	13.0618	12.5638	13.1909	12.8955	12.354	13.2459	12.7842	13.6514	11.4552	12.6627	13.0443	12.7192
MAGEC2	9.08326	11.9958	6.3023	3.41133	2.8861	5.23499	4.33532	2.8861	2.8861	5.89492	7.96733	2.8861	15.0543	3.64119	3.70963	4.46978	13.6528	10.7825
IKZF2	8.24472	8.52288	7.82117	10.1897	10.3441	9.0121	9.31613	10.5457	8.91497	8.67553	8.38564	8.01261	10.8071	11.0595	9.69522	12.8054	8.46137	9.68472
KLF2	11.2197	9.88976	11.1056	10.5149	10.1641	9.771	10.6343	9.60553	13.0855	10.1938	12.0534	10.1333	9.89951	10.0441	10.9895	11.0501	11.3553	11.0125
KLRF1	4.95426	3.93941	5.06735	5.2129	4.22216	6.89704	5.02537	4.47965	4.89272	5.27113	6.46662	5.20994	7.35176	4.883	5.20216	5.03553	4.58733	4.82098
TLR7	11.0085	9.29791	9.76328	8.57815	8.57817	9.46679	9.3488	8.86039	8.03412	9.99258	8.69368	9.92675	9.76952	10.2751	7.49432	9.49815	9.388	8.80171
IL23A	5.66457	9.45222	6.12029	5.2129	8.60364	9.7889	5.60068	6.13162	12.5547	5.57358	8.29798	6.16715	8.886	12.6814	7.16092	8.98485	11.2368	8.83862
OAS1	11.101	12.3321	9.85631	11.0157	11.9084	11.2108	12.5065	11.9186	15.2724	11.918	10.774	10.7486	13.8957	11.6926	10.8446	11.9621	14.3675	13.4214
OAS2	11.1821	12.7749	10.6544	11.3544	10.9704	11.106	12.3392	12.0571	10.4225	10.7	10.6732	11.6666	12.9861	11.3531	11.8451	10.8064	12.4735	11.3856
TLR9	8.88125	6.75465	7.53774	6.66431	5.34581	9.5006	8.81407	7.52402	6.98327	5.98744	7.13138	7.78323	7.91776	10.3354	5.98695	6.75158	5.2892	7.9068
HERC6	8.5518	10.895	8.58901	9.5137	8.09399	9.46679	10.2892	9.68854	8.71697	9.19865	9.96903	8.43267	11.9678	9.6678	10.7284	9.57462	10.4418	9.15865
B3GAT1	5.6017	4.9814	5.1681	4.32012	10.9782	7.17421	4.94732	5.10403	4.82416	5.19362	6.16232	4.95603	5.1195	4.16649	5.73772	4.46978	2.8861	4.30167
HLA-DRA	17.3993	16.5683	15.8694	16.3666	16.0433	16.5757	15.6528	15.6643	15.6153	16.6834	16.2521	16.1723	15.921	16.8825	16.333	15.5703	15.6445	15.7819
CRTAM	7.60993	7.04173	7.98848	8.0778	6.84608	7.75953	6.6466	7.15813	7.09668	7.52681	7.94085	6.75684	6.33482	6.76218	7.86016	6.08958	5.67116	7.91259
HLA-DQA2	3.81509	3.93941	3.94534	4.40007	4.34021	3.56703	2.8861	3.4745	4.59239	4.02541	4.47073	6.91318	4.31263	6.14953	4.38013	2.8861	5.25483	3.77406
SLAMF8	12.4416	10.9494	10.8686	11.6149	11.4085	10.4808	11.3026	11.1036	11.2435	10.2021	9.7065	11.3228	10.016	11.8038	9.66695	10.4982	11.7509	11.1806
IL22	2.8861	2.8861	2.8861	2.8861	2.8861	2.8861	2.8861	2.8861	2.8861	2.8861	2.8861	2.8861	2.8861	2.8861	2.8861	2.8861	2.8861	3.40411
NFKBIA	11.3293	13.3645	12.7122	11.3555	11.3998	11.3214	12.9599	12.9578	12.3064	12.7859	14.7378	12.2946	12.4041	11.2846	12.583	15.3401	12.3866	14.2374
MAGEA10	5.10206	2.8861	4.19203	8.13996	2.8861	3.9486	2.8861	4.92818	2.8861	9.27978	4.71992	2.8861	13.5244	3.42304	3.47232	6.81628	11.8338	12.7746
CD209	10.4416	10.0816	9.51746	9.94488	11.5825	8.68744	10.032	8.99343	9.62026	9.28653	8.44019	9.91546	10.9179	9.76376	9.13038	8.86815	10.6264	9.50701
SLAMF7	13.5724	11.8114	12.0579	12.6594	11.6999	13.0344	13.2431	11.7632	11.291	10.7521	10.8098	12.4559	10.5803	12.208	11.013	11.0832	9.42756	12.2668
IFNA17	2.8861	2.8861	3.24623	3.41133	2.8861	2.8861	3.36174	2.8861	2.8861	2.8861	4.57673	2.8861	2.8861	2.8861	2.8861	2.8861	2.8861	3.40411
IL21	5.14784	4.1629	5.1681	4.84472	4.79667	5.20115	5.69603	5.04801	4.75164	4.02541	5.07136	5.71756	3.91449	5.73119	4.03595	2.8861	2.8861	4.92237
AXL	11.0687	11.1646	10.3835	10.4793	9.53459	9.87906	9.0309	9.46751	11.5293	9.6669	10.3768	10.8342	9.08652	9.1012	10.8348	10.1627	10.1782	10.0886
MS4A1	8.85512	5.91204	9.29834	7.29552	4.79667	8.1405	8.84494	9.88587	7.40243	6.59628	8.75573	7.86185	5.20202	6.95593	8.03385	5.58757	4.1657	10.026
FOXM1	8.87151	11.6395	10.0973	12.1394	13.5344	12.1624	11.116	12.6611	14.2833	11.9363	10.6711	12.5696	14.3603	12.6474	12.3137	15.8754	12.3644	11.0542
C10orf54	12.2356	10.7602	11.6192	10.8272	11.2611	11.2124	11.742	11.3782	11.619	10.9199	10.9753	11.9868	11.0248	10.3899	11.3735	11.5105	11.1998	11.6125
IFIH1	10.472	12.0878	11.8081	11.7012	10.5135	11.2421	10.3343	11.3963	11.3036	11.5199	10.9012	10.6379	12.8427	10.2298	11.5284	11.6888	11.463	12.1046
IKZF4	6.19503	6.28403	7.12324	7.37533	8.05017	6.11606	8.66349	6.7521	7.73528	7.24161	6.52755	6.16715	9.60141	7.92157	6.0967	9.84542	5.72152	6.61531
IFI6	12.3502	14.1451	11.9722	14.4481	13.0278	14.2396	15.4268	12.9858	12.5235	13.927	13.0411	12.3359	16.6612	13.2908	13.2015	11.9798	14.803	13.476
VTCN1	2.8861	4.9814	4.62077	3.62489	2.8861	8.14478	3.55578	7.64596	6.45374	4.71707	5.98146	7.77074	8.69457	5.44532	8.38326	11.1628	5.2892	6.49643
ZBTB46	7.54596	8.16725	7.83588	8.66877	10.6059	8.42045	7.13008	7.53378	8.96795	8.09721	8.74557	7.12463	7.6342	6.41993	7.10999	7.85185	8.26316	7.92981
PDCD1LG2	10.6305	10.7025	9.50464	10.4722	10.0296	10.0702	10.0651	9.3345	9.37897	9.41932	10.5662	9.76164	9.43579	10.3617	9.30144	8.83744	10.0717	10.2074
KREMEN1	9.23785	10.4594	10.1986	9.49004	12.9631	10.2024	11.1197	11.3097	16.6706	10.6088	9.61743	12.5656	12.7	9.63997	13.0894	16.1196	14.2705	10.6073
DGAT2	7.41775	9.05138	10.6893	9.7872	12.0067	8.28726	8.22502	10.0911	10.8214	14.0889	7.89561	9.36094	11.1168	10.2098	9.26127	12.5512	8.51832	9.39379
HAVCR2	11.6932	11.4283	11.0075	11.514	11.1522	11.0328	10.7345	10.3515	10.8326	10.8706	10.7589	11.1022	10.5046	11.6161	10.2232	10.8261	12.3022	10.4212
GZMH	9.37056	8.28153	8.32294	9.27385	8.48253	8.77294	7.98276	8.29394	8.38532	9.33506	8.59813	7.86185	7.04349	7.38139	8.47145	7.78899	6.39553	8.1218
HLA-DPA1	15.5781	15.4976	14.0888	15.4015	14.2352	14.3895	14.8138	14.7526	14.9528	15.6682	15.0762	14.6779	15.2526	14.7979	15.0874	14.7511	14.6955	13.8845
GADD45GIP1	11.233	11.6871	11.185	13.649	13.8984	11.47	11.7664	13.2768	14.7715	12.073	11.7866	11.9989	13.7001	14.463	11.9943	14.6492	13.5148	12.4011
IL17F	3.42857	2.8861	2.8861	3.62489	2.8861	2.8861	2.8861	2.8861	4.05856	3.61767	4.15166	2.8861	2.8861	2.8861	2.8861	2.8861	2.8861	2.8861
LRG1	8.3974	9.52461	12.1255	8.26611	7.33511	6.94712	9.21542	11.1629	7.4134	9.04267	8.8297	11.5335	9.82978	9.72189	10.0471	8.75768	6.87257	12.4607
SH2D1B	5.31664	4.93066	5.74382	5.98776	4.71821	5.20115	5.55041	5.52405	5.24177	6.59628	6.55121	5.57817	6.22471	3.80583	6.3387	6.37509	5.21956	7.06431
TAGAP	11.9121	10.1033	11.6233	10.3787	9.71602	11.3779	11.4818	10.6657	10.1071	10.519	11.1312	11.0295	10.3722	10.4043	10.7378	10.0333	9.47866	11.5057
ADGRE5	12.2666	12.1522	11.7855	12.765	13.1911	11.2118	12.3219	10.9438	13.4452	11.9583	12.6828	11.4509	11.196	12.9228	11.17	11.556	11.4873	11.7524
PTPN6	12.1932	11.2707	11.0316	11.2515	12.2715	11.8161	11.0291	11.758	12.4422	11.518	12.744	11.5009	12.63	11.3554	10.7534	14.8096	11.7752	11.3203
CLEC4C	5.89094	7.69402	6.38523	5.81805	3.74871	6.37351	6.1113	5.30701	5.18965	6.59628	5.98146	5.42304	7.36899	6.08419	6.48645	5.97995	4.98557	5.01632
MADCAM1	3.64888	3.42145	4.42659	10.0698	5.57506	2.8861	3.36174	2.8861	6.06242	3.61767	4.84817	3.89853	2.8861	3.64119	5.39043	2.8861	2.8861	5.26341
BCL2L11	9.57445	9.90379	10.6897	9.48805	12.0942	11.7993	10.4391	10.6184	12.7515	12.2381	10.0993	10.5747	12.8388	11.9795	11.019	13.3727	10.5189	9.82465
TLR8	9.99803	8.54294	9.44262	9.78881	9.14123	9.083	8.90719	7.92322	8.69019	8.77485	7.65071	9.09433	8.70815	9.62301	7.91302	9.0928	9.75671	8.60866
MAPK14	11.5049	11.6984	11.8149	13.0016	14.9153	11.4721	11.8438	12.7419	14.5697	13.8042	11.5653	11.54	14.0013	12.8464	12.5994	14.6393	12.7683	12.73
STAT3	12.9699	13.0771	13.6812	14.3554	14.2006	13.2709	13.7095	13.2989	14.4164	14.069	13.1159	13.2939	15.0627	13.5857	13.7935	15.4428	13.3776	13.814
JCHAIN	14.3267	12.2819	14.336	12.1523	10.5741	14.9136	14.127	13.4207	12.7988	10.0922	13.0395	13.3502	12.1647	12.1722	12.529	12.8231	9.86082	13.5268
NCR3	5.69497	4.1629	5.65188	4.84472	3.74871	5.92749	5.41603	5.81264	5.07884	4.38618	5.07136	5.45551	5.1195	4.93593	4.85736	4.0326	4.07598	6.29712
CBLB	9.91196	11.2029	10.5739	8.33416	9.41884	10.963	9.00836	9.88207	13.1224	9.28877	12.0601	10.0311	10.2933	10.0285	10.58	12.7395	11.6119	10.1837
LMNA	13.6643	14.8767	14.106	15.1873	14.2726	13.2702	13.8798	14.8358	16.3784	14.8772	15.9929	14.1387	15.1929	14.5539	15.4453	17.3428	15.5648	14.8886
CD8A	10.5101	9.96304	10.0802	10.6384	10.0722	10.6103	9.72977	9.44961	10.9614	10.0452	9.64501	9.59475	8.92724	9.77574	10.8933	9.89844	8.86147	9.47416
CD8B	8.22954	7.81123	8.03	8.31183	12.5733	8.84579	8.58643	7.88565	15.7742	8.31971	8.82006	7.70005	8.88001	9.30161	9.10142	7.50585	11.9964	7.68811
NFATC1	8.4937	8.50253	8.36814	7.45909	7.35928	8.39909	7.65693	10.1713	9.45516	9.22464	8.16327	8.80112	7.77005	9.50866	9.25543	11.5677	8.34417	7.5163
TIGIT	9.48996	9.20781	10.3388	9.73615	9.37218	10.4396	9.88382	9.73361	9.25961	9.22464	9.02078	9.71194	8.25055	9.38222	10.1991	8.75768	7.04774	9.17798
CD86	11.3364	10.4989	10.6407	11.0911	10.9536	10.5316	10.9138	9.84538	10.1891	10.7168	9.62714	10.4888	10.6594	11.109	10.2659	10.3966	11.1662	10.3215
TUBB	15.1304	15.5112	15.3772	17.6832	18.3794	16.109	15.2367	16.2491	18.0508	16.5589	15.0079	15.7694	18.5503	16.9355	17.0954	19.0382	17.19	16.2675
NCAM1	9.97699	4.82272	6.60841	6.19935	7.56028	10.6628	7.04379	5.35328	11.757	6.62511	8.80302	6.42979	14.5967	11.9839	5.73772	7.65438	8.8806	6.00061
ITGA1	11.2152	12.1272	12.045	12.381	12.8907	10.3553	11.0628	10.8813	12.8993	12.2203	13.1007	11.5018	13.1201	10.9818	11.6043	12.6627	13.9544	11.4694
BTLA	8.24974	7.85042	8.46021	7.49922	6.23493	9.30208	9.01289	8.44618	7.65439	6.94361	9.59498	7.89099	7.89417	7.63589	7.6626	8.77399	4.85061	8.38153
BAGE	6.47996	8.86	2.8861	3.78618	3.74871	3.56703	2.8861	2.8861	8.89166	3.61767	5.45465	2.8861	10.796	2.8861	3.47232	6.37509	7.43624	2.8861
IDO2	2.8861	4.42708	5.08813	3.92009	2.8861	3.71633	3.93147	4.16832	3.90814	4.38618	4.62636	4.57736	4.83509	3.42304	4.7897	2.8861	2.8861	4.21637
CD247	9.69348	9.2693	9.76251	9.41665	9.04038	10.2794	10.0857	9.40519	9.10603	9.66172	9.98314	8.98787	8.64599	9.15986	9.64704	9.16877	6.59523	9.0527
TYROBP	14.9086	13.095	12.9609	13.575	13.6703	12.8002	13.0617	12.5148	13.1287	13.0592	13.2403	13.3427	12.9616	13.625	11.8122	13.0375	14.9581	12.94
HLA-F-AS1	5.50165	6.00881	4.23484	5.08669	4.08911	4.35819	4.72836	4.92818	6.8761	4.46026	5.85292	4.29125	3.62081	3.80583	5.55569	5.97995	5.61889	3.9063
CX3CR1	7.70818	6.35896	6.50119	5.25244	4.6344	4.35819	5.0627	5.60204	4.18863	7.27825	6.45412	7.75814	7.33431	4.883	4.98274	6.45877	5.3554	6.29712
