# Supplementary material for: Comprehensive Characterization of Human Lung Large Cell Carcinoma Identifies Transcriptomic Signatures with Potential Implications in Response to Immunotherapy
Source: J Clin Med. 2022 Mar 9;11(6):1500. doi: 10.3390/jcm11061500 (PMC8953709; doi:10.3390/jcm11061500)
Supplement: Supplementary file 1 [file jcm-11-01500-s001.zip › J Ramos-Paradas et al., Table S4.xlsx]

## Sheet: Immunohistochemistry data
SUPPLEMENTARY TABLE S4. Level of infiltration of several immune cell populations, PD-L1 expression and histological markers evaluated by immunohistochemistry.
#ID	CD8 Score	CD4 Score	CD68 Score	CD20 Score	PD-L1 expression (%) *	TTF-1 score	p40 score
P17011-001-07	1	0	2	1	Negative	2	0
P17011-001-08	1	0	1	0	40	2	0
P17011-001-101	1	0	1	1	Negative	0	0
P17011-001-113	1	1	1	1	Negative	0	0
P17011-001-119	1	0	2	0	Negative	0	0
P17011-001-12	2	1	2	2	Negative	0	0
P17011-001-127	1	1	2	2	Negative	2	0
P17011-001-131	1	2	2	2	Negative	0	2
P17011-001-132	0	0	2	0	Negative	0	0
P17011-001-145	0	0	1	0	Negative	0	0
P17011-001-15	1	0	1	1	Negative	0	2
P17011-001-16	1	0	2	1	Negative	0	2
P17011-001-166	0	0	1	1	Negative	1	0
P17011-001-174	1	0	2	1	Negative	0	0
P17011-001-19	2	0	1	1	Negative	0	2
P17011-001-20	1	0	1	1	30	0	2
P17011-001-38	2	0	2	1	Negative	2	0
P17011-001-51	1	0	2	1	60	0	0
Note
Score	% of expression
0	< 1
1	1 to 10
2	> 10
* The considered PD-L1 expression cut-off for positivity was 1%
