# Supplementary material for: Comprehensive Characterization of Human Lung Large Cell Carcinoma Identifies Transcriptomic Signatures with Potential Implications in Response to Immunotherapy
Source: J Clin Med. 2022 Mar 9;11(6):1500. doi: 10.3390/jcm11061500 (PMC8953709; doi:10.3390/jcm11061500)
Supplement: Supplementary file 1 [file jcm-11-01500-s001.zip › J Ramos-Paradas et al., Table S5_reviewed.xlsx]

## Sheet: All OIRRA genes
SUPPLEMENTARY TABLE S5. Analysis of differential expression profiles between the pro-immunogenic and pro-tumorigenic LCC tumors.
Supplementary Table S5A. Complete data for the analysis of differential expression between the pro-immunogenic and pro-tumorigenic LCC tumors.
Genes	log2FC	Fold Change	FDR	OIRRA Gene Category (Figure 3B)	Gene Cluster (Figure 3A)
ABCF1	-1.17365	0.443299	0.000949422	Housekeeping	B
ADGRE5	0.179895	1.1328	0.678291	Adhesion, migration	A		Note: The Limma Voom analysis was performed directionally by comparing the pro-immunogenic tumors vs the pro-tumorigenic tumors. Therefore, fold changes in this table should be interpreted as genes upregulated and downregulated in the pro-immunogenic tumors when compared to the pro-tumorigenic tumors.
ADORA2A	0.824258	1.77062	0.0400287	Checkpoint pathway	C
AIF1	0.394185	1.3142	0.242581	Macrophage	C
AKT1	-0.625121	0.648366	0.0630864	Tumor marker	B
ALOX15B	0.915576	1.88632	0.383599	Macrophage	A
ARG1	0.861707	1.81719	0.522156	Myeloid marker	B
AXL	0.988149	1.98364	0.0535737	Innate immune response	C
B3GAT1	1.6132	3.05929	0.132963	NK activation	C
BAGE	-2.9316	0.131069	0.0707308	Tumor antigen	C
BATF	1.52063	2.86915	0.00195479	Helper T cells	A
BCL2	-0.63443	0.644195	0.325424	Apoptosis	B
BCL2L11	-0.490645	0.711707	0.197101	Apoptosis	B
BCL6	0.220556	1.16518	0.641605	Type II interferon signaling	B
BRCA1	-1.72904	0.301653	0.000586309	Tumor marker	B
BRCA2	-1.22881	0.42667	0.0038571	Tumor marker	B
BST2	0.881577	1.84239	0.101303	Type I interferon signaling	A
BTLA	2.06756	4.19178	0.00143266	Checkpoint pathway	A
BUB1	-1.49594	0.354549	0.00206566	Proliferation	B
C10orf54	1.07057	2.10026	0.00144451	Checkpoint pathway	A
C1QA	0.40196	1.3213	0.376966	Innate immune response	C
C1QB	0.205475	1.15307	0.681525	Innate immune response	C
CA4	-0.251471	0.840039	0.874713	Neutrophil	C
CBLB	0.271507	1.20707	0.691368	T cell receptor signaling	B
CCL17	2.52512	5.75622	0.0224187	Chemokine signaling	C
CCL18	0.509515	1.42357	0.542981	Lymphocyte infiltrate	C
CCL2	0.937667	1.91543	0.23797	Lymphocyte infiltrate	C
CCL20	3.556	11.7615	0.00228478	Chemokine signaling	A
CCL21	1.24078	2.36326	0.197101	Lymphocyte infiltrate	A
CCL22	2.4981	5.64941	0.00218648	Chemokine signaling	A
CCL3	0.7236	1.6513	0.194292	Lymphocyte infiltrate	C
CCL4	0.892704	1.85665	0.0682758	Lymphocyte infiltrate	A
CCL5	0.790426	1.72958	0.139785	Lymphocyte infiltrate	A
CCNB2	-1.66557	0.31522	0.00183577	Proliferation	B
CCR1	0.424058	1.3417	0.339527	Cytokine signaling	C
CCR2	1.30449	2.46996	0.0184265	Helper T cells	C
CCR4	1.99189	3.97759	0.0038571	Chemokine signaling	A
CCR5	0.914414	1.8848	0.0257561	Lymphocyte infiltrate	A
CCR6	1.98841	3.968	0.00265754	Chemokine signaling	A
CCR7	2.015	4.04179	0.00228478	TCR coexpression	A
CD14	0.543357	1.45736	0.170228	Dendridic cell, macrophage	C
CD160	1.19768	2.2937	0.197101	Checkpoint pathway	C
CD163	-0.0589699	0.959949	0.927178	Macrophage	C
CD19	3.08609	8.4919	0.00566812	B cell marker	A
CD1C	1.67032	3.18285	0.0461582	Antigen presentation	A
CD1D	0.421142	1.33899	0.415428	Antigen presentation	C
CD2	1.38528	2.61223	0.00101278	Lymphocyte infiltrate	A
CD209	0.00981518	1.00683	0.989176	Dendridic cell, macrophage	C
CD22	2.26396	4.80307	0.00956462	B cell marker	A
CD226	0.357386	1.2811	0.310337	Adhesion, migration	B
CD244	1.1778	2.26232	0.00915303	Checkpoint pathway	A
CD247	1.70798	3.26703	0.000202031	TCR coexpression	A
CD27	2.33562	5.04767	0.00568953	Drug target	A
CD274	0.703643	1.62861	0.307829	Checkpoint pathway	B
CD276	-0.569023	0.674073	0.119258	Checkpoint pathway	B
CD28	0.963305	1.94977	0.0375954	Checkpoint pathway	C
CD33	0.51614	1.43012	0.42415	Myeloid marker	C
CD37	1.18709	2.27694	0.0122419	Lymphocyte infiltrate	A
CD38	0.87744	1.83711	0.155533	Adhesion, migration	B
CD3D	1.54182	2.91162	0.000949422	TCR coexpression	A
CD3E	1.3705	2.5856	0.00436274	TCR coexpression	A
CD3G	1.01452	2.02023	0.0180218	TCR coexpression	C
CD4	0.364415	1.28736	0.327536	Helper T cells	C
CD40	0.158339	1.116	0.721037	Drug target	C
CD40LG	1.48096	2.79134	0.0383548	T cell receptor signaling	A
CD44	0.705143	1.63031	0.599529	Adhesion, migration	B
CD47	0.403405	1.32263	0.287662	Adhesion, migration	B
CD48	1.04494	2.06327	0.0362379	Checkpoint pathway	A
CD52	0.722498	1.65004	0.14902	Lymphocyte infiltrate	C
CD53	3.46001	11.0044	0.00568953	Adhesion, migration	A
CD6	1.20041	2.29805	0.0184265	TCR coexpression	A
CD63	-0.3417	0.789111	0.326029	Lymphocyte infiltrate	B
CD68	-0.110984	0.925956	0.801823	Macrophage	C
CD69	1.6892	3.22477	0.00233781	Checkpoint pathway	A
CD70	0.864165	1.82029	0.310337	Drug target	A
CD74	0.982664	1.97611	0.0640396	Antigen processing	A
CD79A	2.8333	7.12701	0.0133475	B cell receptor signaling	A
CD79B	2.22193	4.66518	0.0145857	B cell receptor signaling	A
CD80	0.964091	1.95083	0.0545992	Checkpoint pathway	A
CD83	-0.254011	0.838562	0.5548	Antigen presentation	B
CD86	0.426661	1.34412	0.247634	Checkpoint pathway	C
CD8A	0.882316	1.84333	0.058764	TCR coexpression	A
CD8B	-1.6886	0.310227	0.0185265	TCR coexpression	C
CDK1	-2.21749	0.215016	8.93833e-05	Proliferation	B
CDKN2A	-3.10999	0.115825	0.0138134	Tumor marker	B
CDKN3	-1.37204	0.386345	0.025603	Proliferation	B
CEACAM1	0.391043	1.31134	0.641605	Checkpoint pathway	B
CEACAM8	0.746033	1.67717	0.582492	Myeloid marker	C
CIITA	1.5429	2.91381	0.00617343	Type II interferon signaling	A
CLEC4C	1.55544	2.93924	0.14072	Dendridic cell	C
CMKLR1	1.46429	2.75927	0.0979805	Dendridic cell, macrophage	A
CORO1A	0.657742	1.57761	0.0917018	Lymphocyte infiltrate	C
CRTAM	1.65323	3.14537	0.0107908	TCR coexpression	A
CSF1R	0.419467	1.33743	0.344721	Cytokine signaling	C
CSF2RB	1.39771	2.63483	0.00233781	Cytokine signaling	A
CTAG1B	-1.74535	0.298261	0.466773	Tumor antigen	B
CTAG2	-1.16388	0.44631	0.558849	Tumor antigen	B
CTLA4	0.300763	1.2318	0.592304	Drug target	C
CTSS	0.556685	1.47089	0.0902492	Lymphocyte infiltrate	C
CX3CL1	1.77886	3.43154	0.0303757	Type II interferon signaling	A
CX3CR1	1.79813	3.47768	0.035694	Lymphocyte infiltrate	C
CXCL1	2.85761	7.24813	0.0038571	Chemokine signaling	A
CXCL10	1.1111	2.1601	0.120148	Type II interferon signaling	A
CXCL11	1.10398	2.14947	0.171008	Type II interferon signaling	A
CXCL13	2.27343	4.83472	0.0283805	Type II interferon signaling	A
CXCL8	1.72676	3.30983	0.0960053	Cytokine signaling	A
CXCL9	0.718714	1.64571	0.419595	Type II interferon signaling	A
CXCR2	2.02182	4.06095	0.0303757	Chemokine signaling	B
CXCR3	1.81342	3.51473	0.00775778	Chemokine signaling	A
CXCR4	0.132191	1.09596	0.814858	Lymphocyte infiltrate	B
CXCR5	3.27883	9.70565	0.0056739	Type II interferon signaling	A
CXCR6	1.43887	2.71108	0.00705196	Lymphocyte infiltrate	A
CYBB	1.04471	2.06296	0.00915536	Type II interferon signaling	A
DDX58	0.213839	1.15977	0.665502	Interferon signaling	C
DGAT2	-0.506678	0.703841	0.424263	Neutrophil	B
DMBT1	3.67994	12.8165	0.10257	Innate immune response	C
EBI3	0.541306	1.45529	0.325424	T cell regulation	C
EFNA4	-0.739393	0.598991	0.153046	Tumor marker	B
EGFR	1.8175	3.52469	0.0362379	Tumor marker	B
EGR2	0.462201	1.37764	0.451474	T cell differentiation	B
EGR3	0.747882	1.67933	0.337891	Tumor marker	B
EIF2AK2	-0.570254	0.673498	0.0960053	Type II interferon signaling	B
ENTPD1	1.09859	2.14146	0.00617343	Checkpoint pathway	A
EOMES	0.44725	1.36344	0.468659	Checkpoint pathway	C
FAS	1.58029	2.99031	0.00101278	B cell receptor signaling	A
FASLG	0.547678	1.46173	0.337891	Type II interferon signaling	C
FCER1G	0.335962	1.26222	0.385343	Lymphocyte infiltrate	C
FCGR1A	0.233307	1.17553	0.611657	B cell marker	C
FCGR2B	1.7156	3.28432	0.00806589	B cell marker	A
FCGR3A	0.230154	1.17296	0.662831	Macrophage	C
FCGR3B	1.15874	2.23263	0.0732803	NK activation	C
FCRLA	3.25209	9.52744	0.0123493	B cell marker	A
FOXM1	-1.47961	0.358586	0.0144179	Proliferation	B
FOXO1	0.544465	1.45848	0.211926	PD-1 signaling, tumor marker	B
FOXP3	1.56424	2.95722	0.00763961	T cell regulation	A
FUT4	-0.695496	0.617497	0.132963	Myeloid marker, stem cell	B
FYB	1.50505	2.83834	0.00137291	Lymphocyte infiltrate	A
G6PD	-1.34527	0.393581	0.0306674	Housekeeping	B
GADD45GIP1	-1.44303	0.367794	8.93833e-05	Apoptosis	B
GAGE1,GAGE12I,GAGE12F	-2.97873	0.126857	0.235468	Tumor antigen	B
GAGE10	1.17253	2.25407	0.308174	Tumor antigen	A
GAGE12J	-1.30316	0.405238	0.543834	Tumor antigen	B
GAGE13	-0.602643	0.658546	0.589091	Tumor antigen	B
GAGE2C,GAGE2A,GAGE2E	-3.10977	0.115842	0.177329	Tumor antigen	B
GATA3	0.910884	1.8802	0.167704	Helper T cells	C
GBP1	1.14029	2.20426	0.0084781	Type II interferon signaling	A
GNLY	0.721949	1.64941	0.279962	NK activation	A
GPR18	1.95781	3.88471	0.0023872	TCR coexpression	A
GRAP2	0.679312	1.60138	0.147463	TCR coexpression	A
GUSB	-0.621147	0.650154	0.0398359	Housekeeping	B
GZMA	1.12936	2.18761	0.0196617	Lymphocyte infiltrate	A
GZMB	1.18025	2.26617	0.0303757	Lymphocyte infiltrate	A
GZMH	1.48716	2.80336	0.00502665	Lymphocyte infiltrate	A
GZMK	1.89573	3.72111	0.00470418	Lymphocyte infiltrate	A
HAVCR2	0.365232	1.28809	0.307829	Checkpoint pathway	C
HERC6	0.572068	1.48665	0.277044	Dendridic cell	C
HGF	-0.0064545	0.995536	0.9896	Cytokine signaling	B
HIF1A	0.116969	1.08445	0.780755	PD-1 signaling, tumor marker	B
HLA-A	-0.177243	0.884391	0.955505	Antigen processing	B
HLA-B	1.69271	3.23264	0.419969	Antigen processing	C
HLA-C	1.11209	2.16158	0.0175511	Antigen processing	C
HLA-DMA	0.8995	1.86542	0.0283805	Antigen processing	A
HLA-DMB	-0.749416	0.594844	0.592304	Antigen processing	C
HLA-DOA	0.844815	1.79603	0.128493	Antigen processing	A
HLA-DOB	2.43639	5.41285	0.00130376	Antigen processing	A
HLA-DPA1	0.743306	1.67401	0.539012	Antigen processing	A
HLA-DPB1	1.04147	2.05832	0.0118364	Antigen processing	A
HLA-DQA1	2.4343	5.40502	0.0413388	Antigen processing	A
HLA-DQA2	-0.597774	0.660773	0.710312	Antigen processing	C
HLA-DQB2	2.10169	4.29211	0.131014	Antigen processing	A
HLA-DRA	1.01788	2.02494	0.00736773	Antigen processing	A
HLA-DRB1	1.60018	3.03181	0.172889	Antigen processing	A
HLA-E	0.86491	1.82123	0.0019736	Antigen processing	B
HLA-F	0.917629	1.88901	0.0235726	Antigen processing	A
HLA-F-AS1	0.683445	1.60597	0.402024	Antigen processing	C
HLA-G	1.17286	2.25458	0.461596	Antigen processing	A
HMBS	-1.13472	0.455423	0.0125609	Housekeeping	B
ICAM1	1.91275	3.76525	0.00155846	Type II interferon signaling	A
ICOS	1.91578	3.77316	0.000540994	Checkpoint pathway	A
ICOSLG	0.117112	1.08456	0.78074	Checkpoint pathway	B
ID2	-1.51703	0.349404	0.000496584	T cell regulation	B
ID3	-1.96815	0.25558	0.000764282	T cell regulation	B
IDO1	1.55827	2.94501	0.0303757	Drug target	A
IDO2	2.33489	5.04511	0.009388	Checkpoint pathway	A
IFI27	0.498128	1.41238	0.543834	Type I interferon signaling	C
IFI35	0.269213	1.20515	0.463846	Interferon signaling	B
IFI44L	0.650853	1.5701	0.38239	Interferon signaling	C
IFI6	0.295706	1.22749	0.67746	Interferon signaling	C
IFIH1	0.639873	1.55819	0.0740172	Innate immune response	B
IFIT1	0.311603	1.24109	0.641605	Type I interferon signaling	C
IFIT2	0.224122	1.16807	0.634313	Cytokine signaling	C
IFIT3	0.334699	1.26111	0.547015	Type I interferon signaling	C
IFITM1	0.990723	1.98718	0.0125019	Type I interferon signaling	A
IFITM2	0.807218	1.74983	0.0602888	Type I interferon signaling	A
IFNA17	0.725677	1.65368	0.446697	T cell receptor signaling	A
IFNB1	0.582793	1.49775	0.516882	Type II interferon signaling	B
IFNG	1.28985	2.44503	0.115634	Type II interferon signaling	A
IGF1R	-0.897583	0.536785	0.14902	Adhesion, migration	B
IGSF6	0.919723	1.89175	0.045766	Lymphocyte infiltrate	A
IKZF1	1.34444	2.53931	0.00227675	Lymphocyte development	A
IKZF2	-0.713238	0.60995	0.116664	Lymphocyte development	B
IKZF3	1.68562	3.21678	0.00455226	TCR coexpression	A
IKZF4	-0.619964	0.650687	0.23436	Lymphocyte development	B
IL10	0.392896	1.31303	0.481912	Drug target	C
IL10RA	0.913114	1.88311	0.0221641	Lymphocyte infiltrate	A
IL12A	0.483174	1.39782	0.463846	Drug target	B
IL12B	2.30305	4.93499	0.0224187	Drug target	A
IL13	1.62646	3.08755	0.165977	Cytokine signaling	A
IL15	0.859573	1.8145	0.063964	T cell regulation	B
IL17A	2.03353	4.09405	0.111593	Helper T cells	C
IL17F	-0.0171727	0.988167	0.986675	Dendridic cell, macrophage	A
IL18	1.82426	3.54125	0.000949422	T cell regulation	A
IL1A	3.79416	13.8726	0.00473254	Cytokine signaling	A
IL1B	2.27166	4.82878	0.0040328	Type II interferon signaling	A
IL2	0.770419	1.70576	0.409773	Drug target	A
IL21	2.05198	4.14673	0.0289666	Cytokine signaling	A
IL22	0.19858	1.14757	0.785776	T cell regulation	A
IL23A	-1.99739	0.250453	0.00775778	Dendridic cell, macrophage	C
IL2RA	0.657331	1.57716	0.181919	Cytokine signaling	A
IL2RB	1.17898	2.26417	0.00470418	TCR coexpression	A
IL2RG	1.55439	2.9371	0.000647867	Lymphocyte infiltrate	A
IL3RA	0.963381	1.94987	0.0332821	Dendridic cell	A
IL4	1.68841	3.22302	0.049217	Cytokine signaling	A
IL6	1.71339	3.27932	0.112366	Cytokine signaling	A
IL7	1.90817	3.75333	0.00137291	Cytokine signaling	A
IL7R	1.40072	2.64033	0.00850314	TCR coexpression	A
IRF1	0.785221	1.72336	0.0251209	Type II interferon signaling	B
IRF4	3.05362	8.30292	0.00133007	Interferon signaling	A
IRF9	0.536756	1.45071	0.125529	Type II interferon signaling	C
IRS1	0.0729212	1.05184	0.918382	Tumor marker	B
ISG15	-0.771467	0.585821	0.211926	Type I interferon signaling	C
ISG20	0.861089	1.81641	0.066767	Type I interferon signaling	A
ITGA1	-0.347937	0.785707	0.518652	Adhesion, migration	B
ITGAE	-1.32976	0.397835	0.000496584	Adhesion, migration	B
ITGAL	1.31791	2.49306	0.010947	Leukocyte migration	A
ITGAM	0.378877	1.30033	0.463846	Leukocyte migration	C
ITGAX	0.329376	1.25647	0.490434	Dendridic cell	C
ITGB1	-0.214752	0.861694	0.5548	Adhesion, migration	B
ITGB2	0.467339	1.38256	0.308174	Lymphocyte infiltrate	C
ITGB7	0.836261	1.78542	0.0383548	Leukocyte migration	A
ITK	1.96862	3.91394	0.000496584	TCR coexpression	A
JAML	1.07529	2.10715	0.0475935	Lymphocyte infiltrate	A
JCHAIN	2.24779	4.74954	0.0303757	B cell marker	A
KIAA0101	-1.51917	0.348886	0.00568953	Proliferation	B
KIR2DL1	-1.6601	0.316417	0.0270828	Drug target	C
KIR2DL2	1.01598	2.02227	0.284433	NK cell marker	A
KIR2DL3	0.590248	1.50551	0.569186	NK cell marker	A
KLF2	0.462935	1.37834	0.463846	T cell regulation, trafficking	C
KLRB1	1.92045	3.78541	0.000985554	NK activation	A
KLRD1	0.663034	1.58341	0.197101	Drug target	B
KLRF1	0.814082	1.75818	0.317393	NK activation	C
KLRG1	0.262972	1.19995	0.680186	NK activation	B
KLRK1	1.38075	2.60405	0.0138134	NK activation	A
KREMEN1	-1.55704	0.339848	0.0138134	Neutrophil	B
KRT5	0.166944	1.12268	0.934341	Tumor marker	B
KRT7	1.77105	3.41301	0.0863655	Tumor marker	A
LAG3	0.938503	1.91654	0.0691795	Drug target	A
LAMP1	0.0908115	1.06497	0.843841	Lymphocyte infiltrate	B
LAMP3	1.30518	2.47114	0.147463	TCR coexpression	B
LAPTM5	0.340673	1.26635	0.461596	Lymphocyte infiltrate	C
LCK	-3.4658	0.0905087	0.0107117	TCR coexpression	C
LCN2	4.07987	16.9108	0.00228478	Innate immune response	A
LEXM	1.63391	3.10352	0.0587097	T cell differentiation	B
LILRB1	0.0841332	1.06005	0.903677	Leukocyte inhibition	C
LILRB2	0.518214	1.43218	0.263364	Lymphocyte infiltrate	C
LMNA	-0.203451	0.868471	0.645073	Housekeeping	B
LRG1	2.49527	5.63834	0.00915536	Neutrophil	A
LRP1	0.0291635	1.02042	0.955505	Housekeeping	B
LST1	0.841613	1.79205	0.14072	Leukocyte inhibition	A
LY9	1.68994	3.22644	0.0107117	Lymphocyte infiltrate	A
LYZ	1.06504	2.09223	0.0383548	Innate immune response	A
M6PR	-0.814507	0.568603	0.00143266	T cell regulation	B
MAD2L1	-1.73322	0.30078	0.000586309	Proliferation	B
MADCAM1	-0.516324	0.699151	0.665502	Adhesion, migration	C
MAGEA1	-0.60576	0.657125	0.770116	Tumor antigen	B
MAGEA10	-1.55818	0.339579	0.445056	Tumor antigen	B
MAGEA12	2.21616	4.64656	0.173821	Tumor antigen	B
MAGEA3	-0.441927	0.736151	0.788178	Tumor antigen	B
MAGEA4	0.851204	1.80401	0.690613	Tumor antigen	B
MAGEC2	1.31972	2.49618	0.518652	Tumor antigen	C
MAPK1	-0.920716	0.528247	0.0107117	Tumor marker	B
MAPK14	-0.942534	0.520318	0.00162041	Innate immune response	B
MELK	-2.1331	0.227968	0.000949422	Proliferation	B
MIF	-1.23505	0.424829	0.00436274	Innate immune response	B
MKI67	-1.27686	0.412693	0.0410014	Proliferation	B
MLANA	-0.0236714	0.983726	0.968484	Tumor antigen	C
MMP2	1.35771	2.56277	0.0474238	Tumor marker	A
MMP9	-0.019138	0.986822	0.986013	Tumor marker	C
MPO	0.0566749	1.04007	0.948712	Myeloid marker	C
MRC1	0.818799	1.76394	0.22975	Dendridic cell, macrophage	A
MS4A1	3.68419	12.8544	0.00582276	Drug target	A
MTOR	-1.11979	0.46016	0.000949422	PD-1 signaling, tumor marker	B
MX1	0.584401	1.49942	0.307829	Interferon signaling	C
MYC	-0.947916	0.518381	0.118893	Tumor marker	B
NCAM1	-2.1934	0.218635	0.0133475	Adhesion, migration	B
NCF1	1.0356	2.04997	0.0189537	Chemokine signaling	A
NCR1	1.56888	2.96675	0.0229198	NK cell marker	A
NCR3	1.99658	3.99053	0.00698224	NK cell marker	A
NECTIN2	-0.588309	0.665122	0.202703	Adhesion, migration	B
NFATC1	0.572296	1.48689	0.284433	PD-1 signaling	B
NFKBIA	1.25266	2.3828	0.0049256	T cell receptor signaling	B
NKG7	0.988181	1.98368	0.0369657	Lymphocyte infiltrate	A
NOS2	0.939814	1.91828	0.567101	Innate immune response	B
NOTCH3	-0.551191	0.682456	0.301038	Tumor marker	B
NRP1	0.478256	1.39306	0.312629	Dendridic cell	C
NT5E	1.31681	2.49114	0.121228	Checkpoint pathway	A
NTN3	-1.98734	0.252204	0.0366699	B cell marker	C
OAS1	-0.625122	0.648365	0.244871	Type II interferon signaling	B
OAS2	0.753519	1.6859	0.146631	Interferon signaling	C
OAS3	-0.218101	0.859696	0.665502	Interferon signaling	B
PDCD1	1.07956	2.11339	0.0593618	Drug target	A
PDCD1LG2	0.912317	1.88207	0.0301354	Checkpoint pathway	C
PECAM1	1.19935	2.29637	0.0383548	Adhesion, migration	C
PGF	-0.226475	0.854721	0.701021	Tumor marker	C
PIK3CA	-0.883835	0.541925	0.0198332	PD-1 signaling, tumor marker	B
PIK3CD	0.917066	1.88827	0.0303757	PD-1 signaling, tumor marker	C
PMEL	-0.726588	0.604331	0.225065	Drug target	B
POLR2A	-1.23661	0.42437	0.00617343	Housekeeping	B
POU2AF1	2.63499	6.21169	0.010947	B cell marker	A
PRDM1	0.981939	1.97512	0.0591358	PD-1 signaling	A
PRF1	0.971783	1.96126	0.0475935	NK activation	A
PSMB9	0.961883	1.94785	0.0108327	Type II interferon signaling	A
PTEN	-0.592371	0.663252	0.0645276	PD-1 signaling, tumor marker	B
PTGS2	2.06546	4.18569	0.0303757	Tumor marker	A
PTK7	-1.36343	0.388656	0.00566812	Tumor marker	B
PTPN11	-1.22677	0.427272	0.000586309	PD-1 signaling, tumor marker	B
PTPN6	-0.068297	0.953763	0.821716	T cell receptor signaling	B
PTPN7	1.09091	2.13008	0.0175511	Lymphocyte infiltrate	A
PTPRC	1.97524	3.93193	0.00505183	Lymphocyte infiltrate	A
PTPRCAP	0.883811	1.84524	0.0876624	TCR coexpression	C
PVR	-0.372984	0.772184	0.454363	Checkpoint pathway	B
PYGL	-0.824863	0.564536	0.0935195	Neutrophil	B
RB1	-0.43796	0.738178	0.215786	Tumor marker	B
RORC	1.89969	3.73134	0.0454524	Helper T cells	A
RPS6	-1.01331	0.495408	0.0115371	Tumor marker	B
S100A8	3.02641	8.14779	0.012787	Myeloid marker, MDSC	A
S100A9	3.17061	9.00425	0.00436274	Myeloid marker, MDSC	A
SAMHD1	0.394407	1.3144	0.317393	Lymphocyte infiltrate	B
SDHA	-1.10444	0.465084	0.00162041	Housekeeping	B
SELL	1.33712	2.52647	0.0586239	Leukocyte migration	C
SH2D1A	1.76615	3.40145	0.00211733	Lymphocyte activation	A
SH2D1B	1.52793	2.88371	0.0283936	Lymphocyte activation	A
SIT1	1.13792	2.20063	0.0535737	Lymphocyte infiltrate	A
SKAP2	-0.18161	0.881719	0.550512	B cell marker	B
SLAMF7	1.57044	2.96995	0.0172757	Drug target	A
SLAMF8	0.388555	1.30908	0.402617	Lymphocyte infiltrate	C
SNAI1	-1.66361	0.315648	0.00383278	Tumor marker, stemness	B
SNAI2	-0.118167	0.921358	0.838355	Tumor marker, stemness	B
SRGN	0.805324	1.74754	0.0478903	Lymphocyte infiltrate	A
SSX2	-0.162561	0.893438	0.918382	Tumor antigen	C
STAT1	-0.0447681	0.969446	0.918382	Type II interferon signaling	B
STAT3	-0.120079	0.920137	0.681525	Drug target	B
STAT4	1.46068	2.75238	0.00705196	Helper T cells	A
STAT5A	0.512263	1.42629	0.111625	Cytokine signaling	C
STAT6	0.0880392	1.06292	0.80345	Helper T cells	B
TAGAP	1.8007	3.48389	0.000111977	Lymphocyte infiltrate	A
TAP1	0.493136	1.4075	0.221205	Type II interferon signaling	A
TARP	1.58472	2.99949	0.0076702	Lymphocyte infiltrate	A
TBP	-0.93402	0.523398	0.00143266	Housekeeping	B
TBX21	1.14883	2.21734	0.0259225	Type II interferon signaling	A
TCF7	-0.0271205	0.981377	0.961505	Tumor marker	C
TDO2	1.9745	3.92993	0.00846513	Checkpoint pathway	C
TFRC	-1.36806	0.387413	0.0147049	Housekeeping	B
TGFB1	-0.184217	0.880127	0.592304	Checkpoint pathway	B
TIGIT	1.65776	3.15526	0.000985554	TCR coexpression	A
TLR3	0.612498	1.5289	0.284433	Dendridic cell	B
TLR7	0.932784	1.90896	0.0717983	Innate immune response	C
TLR8	0.201043	1.14953	0.700638	Lymphocyte infiltrate	C
TLR9	1.45905	2.74926	0.077181	Drug target	A
TNF	2.05923	4.16763	0.00183577	Checkpoint pathway	A
TNFAIP8	0.972884	1.96276	0.00877618	Lymphocyte infiltrate	A
TNFRSF14	0.694334	1.61814	0.0362379	Checkpoint pathway	A
TNFRSF17	2.3876	5.23286	0.0366699	B cell marker	A
TNFRSF18	-0.560294	0.678164	0.403024	Drug target	B
TNFRSF4	0.74023	1.67044	0.099826	Drug target	C
TNFRSF9	1.24613	2.37204	0.0133475	Drug target	A
TNFSF10	0.685026	1.60773	0.250235	Apoptosis	B
TNFSF13B	0.474997	1.38992	0.211063	B cell marker	C
TNFSF14	1.87914	3.67857	0.135967	Checkpoint pathway	A
TNFSF18	-0.279707	0.823758	0.721037	Checkpoint pathway	B
TNFSF4	0.809718	1.75287	0.148747	Checkpoint pathway	C
TNFSF9	-0.363811	0.777109	0.622886	Cytokine signaling	B
TOP2A	-1.80558	0.286066	0.00206566	Proliferation	B
TP63	4.27499	19.3598	0.0185265	Tumor marker	A
TRIM29	-2.54857	0.170924	0.106263	Tumor marker	B
TUBB	-1.37093	0.386643	8.93833e-05	Housekeeping	B
TWIST1	-0.230823	0.852148	0.785245	Tumor marker, stemness	C
TYROBP	0.249896	1.18912	0.549634	Lymphocyte infiltrate	C
VCAM1	1.23017	2.34595	0.0366702	Leukocyte migration	A
VEGFA	0.349083	1.27375	0.600786	Chemokine signaling	B
VTCN1	0.572928	1.48754	0.736011	Checkpoint pathway	B
XAGE1B	1.86639	3.6462	0.518798	Tumor antigen	C
ZAP70	1.93819	3.83225	0.000949422	T cell receptor signaling	A
ZBTB46	0.177949	1.13127	0.721037	Dendridic cell	C
ZEB1	0.249012	1.18839	0.550512	Tumor marker, stemness	B

## Sheet: FDR<0.05;log2FChange>I1I
Supplementary Table S5B. Statistically significant genes in the analysis of differential expression between the pro-immunogenic and pro-tumorigenic LCC tumors.
Genes	log2FC	Fold Change	Expression in pro-immunogenic vs pro-tumorigenic tumors	FDR	OIRRA Gene Category (Figure 3B)	Gene Cluster (Figure 3A)
ABCF1	-1.17365	0.443299	Downregulated	0.000949422	Housekeeping	B
BATF	1.52063	2.86915	Upregulated	0.00195479	Helper T cells	A
BRCA1	-1.72904	0.301653	Downregulated	0.000586309	Tumor marker	B		Note: The Limma Voom analysis was performed directionally by comparing the pro-immunogenic tumors vs the pro-tumorigenic tumors. Therefore, fold changes in this table should be interpreted as genes upregulated and downregulated in the pro-immunogenic tumors when compared to the pro-tumorigenic tumors.
BRCA2	-1.22881	0.42667	Downregulated	0.0038571	Tumor marker	B
BTLA	2.06756	4.19178	Upregulated	0.00143266	Checkpoint pathway	A
BUB1	-1.49594	0.354549	Downregulated	0.00206566	Proliferation	B
C10orf54	1.07057	2.10026	Upregulated	0.00144451	Checkpoint pathway	A
CCL17	2.52512	5.75622	Upregulated	0.0224187	Chemokine signaling	C
CCL20	3.556	11.7615	Upregulated	0.00228478	Chemokine signaling	A
CCL22	2.4981	5.64941	Upregulated	0.00218648	Chemokine signaling	A
CCNB2	-1.66557	0.31522	Downregulated	0.00183577	Proliferation	B
CCR2	1.30449	2.46996	Upregulated	0.0184265	Helper T cells	C
CCR4	1.99189	3.97759	Upregulated	0.0038571	Chemokine signaling	A
CCR6	1.98841	3.968	Upregulated	0.00265754	Chemokine signaling	A
CCR7	2.015	4.04179	Upregulated	0.00228478	TCR coexpression	A
CD19	3.08609	8.4919	Upregulated	0.00566812	B cell marker	A
CD1C	1.67032	3.18285	Upregulated	0.0461582	Antigen presentation	A
CD2	1.38528	2.61223	Upregulated	0.00101278	Lymphocyte infiltrate	A
CD22	2.26396	4.80307	Upregulated	0.00956462	B cell marker	A
CD244	1.1778	2.26232	Upregulated	0.00915303	Checkpoint pathway	A
CD247	1.70798	3.26703	Upregulated	0.000202031	TCR coexpression	A
CD27	2.33562	5.04767	Upregulated	0.00568953	Drug target	A
CD37	1.18709	2.27694	Upregulated	0.0122419	Lymphocyte infiltrate	A
CD3D	1.54182	2.91162	Upregulated	0.000949422	TCR coexpression	A
CD3E	1.3705	2.5856	Upregulated	0.00436274	TCR coexpression	A
CD3G	1.01452	2.02023	Upregulated	0.0180218	TCR coexpression	C
CD40LG	1.48096	2.79134	Upregulated	0.0383548	T cell receptor signaling	A
CD48	1.04494	2.06327	Upregulated	0.0362379	Checkpoint pathway	A
CD53	3.46001	11.0044	Upregulated	0.00568953	Adhesion, migration	A
CD6	1.20041	2.29805	Upregulated	0.0184265	TCR coexpression	A
CD69	1.6892	3.22477	Upregulated	0.00233781	Checkpoint pathway	A
CD79A	2.8333	7.12701	Upregulated	0.0133475	B cell receptor signaling	A
CD79B	2.22193	4.66518	Upregulated	0.0145857	B cell receptor signaling	A
CD8B	-1.6886	0.310227	Downregulated	0.0185265	TCR coexpression	C
CDK1	-2.21749	0.215016	Downregulated	8.93833e-05	Proliferation	B
CDKN2A	-3.10999	0.115825	Downregulated	0.0138134	Tumor marker	B
CDKN3	-1.37204	0.386345	Downregulated	0.025603	Proliferation	B
CIITA	1.5429	2.91381	Upregulated	0.00617343	Type II interferon signaling	A
CRTAM	1.65323	3.14537	Upregulated	0.0107908	TCR coexpression	A
CSF2RB	1.39771	2.63483	Upregulated	0.00233781	Cytokine signaling	A
CX3CL1	1.77886	3.43154	Upregulated	0.0303757	Type II interferon signaling	A
CX3CR1	1.79813	3.47768	Upregulated	0.035694	Lymphocyte infiltrate	C
CXCL1	2.85761	7.24813	Upregulated	0.0038571	Chemokine signaling	A
CXCL13	2.27343	4.83472	Upregulated	0.0283805	Type II interferon signaling	A
CXCR2	2.02182	4.06095	Upregulated	0.0303757	Chemokine signaling	B
CXCR3	1.81342	3.51473	Upregulated	0.00775778	Chemokine signaling	A
CXCR5	3.27883	9.70565	Upregulated	0.0056739	Type II interferon signaling	A
CXCR6	1.43887	2.71108	Upregulated	0.00705196	Lymphocyte infiltrate	A
CYBB	1.04471	2.06296	Upregulated	0.00915536	Type II interferon signaling	A
EGFR	1.8175	3.52469	Upregulated	0.0362379	Tumor marker	B
ENTPD1	1.09859	2.14146	Upregulated	0.00617343	Checkpoint pathway	A
FAS	1.58029	2.99031	Upregulated	0.00101278	B cell receptor signaling	A
FCGR2B	1.7156	3.28432	Upregulated	0.00806589	B cell marker	A
FCRLA	3.25209	9.52744	Upregulated	0.0123493	B cell marker	A
FOXM1	-1.47961	0.358586	Downregulated	0.0144179	Proliferation	B
FOXP3	1.56424	2.95722	Upregulated	0.00763961	T cell regulation	A
FYB	1.50505	2.83834	Upregulated	0.00137291	Lymphocyte infiltrate	A
G6PD	-1.34527	0.393581	Downregulated	0.0306674	Housekeeping	B
GADD45GIP1	-1.44303	0.367794	Downregulated	8.93833e-05	Apoptosis	B
GBP1	1.14029	2.20426	Upregulated	0.0084781	Type II interferon signaling	A
GPR18	1.95781	3.88471	Upregulated	0.0023872	TCR coexpression	A
GZMA	1.12936	2.18761	Upregulated	0.0196617	Lymphocyte infiltrate	A
GZMB	1.18025	2.26617	Upregulated	0.0303757	Lymphocyte infiltrate	A
GZMH	1.48716	2.80336	Upregulated	0.00502665	Lymphocyte infiltrate	A
GZMK	1.89573	3.72111	Upregulated	0.00470418	Lymphocyte infiltrate	A
HLA-C	1.11209	2.16158	Upregulated	0.0175511	Antigen processing	C
HLA-DOB	2.43639	5.41285	Upregulated	0.00130376	Antigen processing	A
HLA-DPB1	1.04147	2.05832	Upregulated	0.0118364	Antigen processing	A
HLA-DQA1	2.4343	5.40502	Upregulated	0.0413388	Antigen processing	A
HLA-DRA	1.01788	2.02494	Upregulated	0.00736773	Antigen processing	A
HMBS	-1.13472	0.455423	Downregulated	0.0125609	Housekeeping	B
ICAM1	1.91275	3.76525	Upregulated	0.00155846	Type II interferon signaling	A
ICOS	1.91578	3.77316	Upregulated	0.000540994	Checkpoint pathway	A
ID2	-1.51703	0.349404	Downregulated	0.000496584	T cell regulation	B
ID3	-1.96815	0.25558	Downregulated	0.000764282	T cell regulation	B
IDO1	1.55827	2.94501	Upregulated	0.0303757	Drug target	A
IDO2	2.33489	5.04511	Upregulated	0.009388	Checkpoint pathway	A
IKZF1	1.34444	2.53931	Upregulated	0.00227675	Lymphocyte development	A
IKZF3	1.68562	3.21678	Upregulated	0.00455226	TCR coexpression	A
IL12B	2.30305	4.93499	Upregulated	0.0224187	Drug target	A
IL18	1.82426	3.54125	Upregulated	0.000949422	T cell regulation	A
IL1A	3.79416	13.8726	Upregulated	0.00473254	Cytokine signaling	A
IL1B	2.27166	4.82878	Upregulated	0.0040328	Type II interferon signaling	A
IL21	2.05198	4.14673	Upregulated	0.0289666	Cytokine signaling	A
IL23A	-1.99739	0.250453	Downregulated	0.00775778	Dendridic cell, macrophage	C
IL2RB	1.17898	2.26417	Upregulated	0.00470418	TCR coexpression	A
IL2RG	1.55439	2.9371	Upregulated	0.000647867	Lymphocyte infiltrate	A
IL4	1.68841	3.22302	Upregulated	0.049217	Cytokine signaling	A
IL7	1.90817	3.75333	Upregulated	0.00137291	Cytokine signaling	A
IL7R	1.40072	2.64033	Upregulated	0.00850314	TCR coexpression	A
IRF4	3.05362	8.30292	Upregulated	0.00133007	Interferon signaling	A
ITGAE	-1.32976	0.397835	Downregulated	0.000496584	Adhesion, migration	B
ITGAL	1.31791	2.49306	Upregulated	0.010947	Leukocyte migration	A
ITK	1.96862	3.91394	Upregulated	0.000496584	TCR coexpression	A
JAML	1.07529	2.10715	Upregulated	0.0475935	Lymphocyte infiltrate	A
JCHAIN	2.24779	4.74954	Upregulated	0.0303757	B cell marker	A
KIAA0101	-1.51917	0.348886	Downregulated	0.00568953	Proliferation	B
KIR2DL1	-1.6601	0.316417	Downregulated	0.0270828	Drug target	C
KLRB1	1.92045	3.78541	Upregulated	0.000985554	NK activation	A
KLRK1	1.38075	2.60405	Upregulated	0.0138134	NK activation	A
KREMEN1	-1.55704	0.339848	Downregulated	0.0138134	Neutrophil	B
LCK	-3.4658	0.0905087	Downregulated	0.0107117	TCR coexpression	C
LCN2	4.07987	16.9108	Upregulated	0.00228478	Innate immune response	A
LRG1	2.49527	5.63834	Upregulated	0.00915536	Neutrophil	A
LY9	1.68994	3.22644	Upregulated	0.0107117	Lymphocyte infiltrate	A
LYZ	1.06504	2.09223	Upregulated	0.0383548	Innate immune response	A
MAD2L1	-1.73322	0.30078	Downregulated	0.000586309	Proliferation	B
MELK	-2.1331	0.227968	Downregulated	0.000949422	Proliferation	B
MIF	-1.23505	0.424829	Downregulated	0.00436274	Innate immune response	B
MKI67	-1.27686	0.412693	Downregulated	0.0410014	Proliferation	B
MMP2	1.35771	2.56277	Upregulated	0.0474238	Tumor marker	A
MS4A1	3.68419	12.8544	Upregulated	0.00582276	Drug target	A
MTOR	-1.11979	0.46016	Downregulated	0.000949422	PD-1 signaling, tumor marker	B
NCAM1	-2.1934	0.218635	Downregulated	0.0133475	Adhesion, migration	B
NCF1	1.0356	2.04997	Upregulated	0.0189537	Chemokine signaling	A
NCR1	1.56888	2.96675	Upregulated	0.0229198	NK cell marker	A
NCR3	1.99658	3.99053	Upregulated	0.00698224	NK cell marker	A
NFKBIA	1.25266	2.3828	Upregulated	0.0049256	T cell receptor signaling	B
NTN3	-1.98734	0.252204	Downregulated	0.0366699	B cell marker	C
PECAM1	1.19935	2.29637	Upregulated	0.0383548	Adhesion, migration	C
POLR2A	-1.23661	0.42437	Downregulated	0.00617343	Housekeeping	B
POU2AF1	2.63499	6.21169	Upregulated	0.010947	B cell marker	A
PTGS2	2.06546	4.18569	Upregulated	0.0303757	Tumor marker	A
PTK7	-1.36343	0.388656	Downregulated	0.00566812	Tumor marker	B
PTPN11	-1.22677	0.427272	Downregulated	0.000586309	PD-1 signaling, tumor marker	B
PTPN7	1.09091	2.13008	Upregulated	0.0175511	Lymphocyte infiltrate	A
PTPRC	1.97524	3.93193	Upregulated	0.00505183	Lymphocyte infiltrate	A
RORC	1.89969	3.73134	Upregulated	0.0454524	Helper T cells	A
RPS6	-1.01331	0.495408	Downregulated	0.0115371	Tumor marker	B
S100A8	3.02641	8.14779	Upregulated	0.012787	Myeloid marker, MDSC	A
S100A9	3.17061	9.00425	Upregulated	0.00436274	Myeloid marker, MDSC	A
SDHA	-1.10444	0.465084	Downregulated	0.00162041	Housekeeping	B
SH2D1A	1.76615	3.40145	Upregulated	0.00211733	Lymphocyte activation	A
SH2D1B	1.52793	2.88371	Upregulated	0.0283936	Lymphocyte activation	A
SIT1	1.13792	2.20063	Upregulated	0.0535737	Lymphocyte infiltrate	A
SLAMF7	1.57044	2.96995	Upregulated	0.0172757	Drug target	A
SNAI1	-1.66361	0.315648	Downregulated	0.00383278	Tumor marker, stemness	B
STAT4	1.46068	2.75238	Upregulated	0.00705196	Helper T cells	A
TAGAP	1.8007	3.48389	Upregulated	0.000111977	Lymphocyte infiltrate	A
TARP	1.58472	2.99949	Upregulated	0.0076702	Lymphocyte infiltrate	A
TBX21	1.14883	2.21734	Upregulated	0.0259225	Type II interferon signaling	A
TDO2	1.9745	3.92993	Upregulated	0.00846513	Checkpoint pathway	C
TFRC	-1.36806	0.387413	Downregulated	0.0147049	Housekeeping	B
TIGIT	1.65776	3.15526	Upregulated	0.000985554	TCR coexpression	A
TNF	2.05923	4.16763	Upregulated	0.00183577	Checkpoint pathway	A
TNFRSF17	2.3876	5.23286	Upregulated	0.0366699	B cell marker	A
TNFRSF9	1.24613	2.37204	Upregulated	0.0133475	Drug target	A
TOP2A	-1.80558	0.286066	Downregulated	0.00206566	Proliferation	B
TP63	4.27499	19.3598	Upregulated	0.0185265	Tumor marker	A
TUBB	-1.37093	0.386643	Downregulated	8.93833e-05	Housekeeping	B
VCAM1	1.23017	2.34595	Upregulated	0.0366702	Leukocyte migration	A
ZAP70	1.93819	3.83225	Upregulated	0.000949422	T cell receptor signaling	A
